# Supplementary material for: Doctoral dissertations in logistics and supply chain-related areas: 2005–2009
Source: Springer Nature journal article supplement (doi:10.1007/s12159-013-0108-2), 2013-09-30
Supplement: MOESM1 [file 12159_2013_108_MOESM1_ESM.doc]

Code 1: General Logistics

| **Author** | **Title** | | **Institution** | | **Year** | **Number** | **Abstract** |
| --- | --- | --- | --- | --- | --- | --- | --- |
| Fugate, Brian Scott | The role of logistics in the market orientation process | | University of Tennessee | | 2006 | AAT 3235476 | The ability of an organization to provide customer value and generate profit depends on how well it understands and meets the true needs of its markets. The theory of market orientation captures the essence of discovering and responding to market needs. This dissertation conceptualizes market orientation as a process, includes a more comprehensive set of behaviors of market orientation, and examines market orientation within the logistics function. Logisticians are particularly relevant to market orientation because of their increasing role in the organization as managers of supply chain relationships and as internal and external boundary spanners. The model was developed based on the literature in marketing, logistics, strategic management, organizational behavior, information processing, and knowledge management and data from in-depth interviews with logistics professionals. The nomological network consisted of five constructs: logistics market intelligence generation, logistics market intelligence dissemination, logistics market intelligence shared interpretation, and logistics market intelligence responsiveness. Logistics performance was tested as a second-order construct in the model. The qualitative and empirical survey results reveal that shared interpretation is a mediator between market intelligence dissemination and responsiveness, the impact on performance is a result of market intelligence responsiveness, and the participation of logistics in MO positively impacts performance of the function and the organization as a whole. The absolute fit of the logistics market orientation model was good (RMSEA of .05, CFI of .95, χ 2 = 1635.64, degrees of freedom of 931), and all five hypotheses tested were supported. |
| Lambert, Keith Richard | The development of a framework for an integrated logistics support system within a high technology industry in a developing country | | University of South Africa | | 2008 | AAT 0821138 | This study was conducted by following a structured process; the research consisted of three stages. The first stage dealt with the research problem, including the delimitations of the study. The second stage was further divided into three phases. The first phase deconstructed the appropriate literature, which included the interpretation of numerous definitions of logistics, integrated logistics support, and the integrated logistics support elements. In addition, the research was grounded in the fields of operations management, supply chain management and integrated logistics support. The second phase focused on the deconstruction of six case studies from four different high technology complex systems. From the analysis of the first two phases followed the third phase of research, which focused on the identification of areas requiring further research. Further research was conducted by means of a questionnaire, the results of which were analyzed for variable dependency and variable association. The third stage of the research included the collation and analysis of the findings of the first two stages of research. The analysis utilized the principles of Mode 2 research and design science research, whereby an ILS framework and associated grounded technological rules have been recommended. These recommendations are robust in nature, as they can be applied in the most challenging environment and circumstances as identified. Furthermore, by grounding the theory in the disciplines of operations management, supply chain management and integrated logistics support, the reliability, validity, relevance, and applicability of the study could be substantiated. This implied that the generated theoretical knowledge could be transferred to and applied in practice, and as such, an organization can reap substantial value added benefits, and gain considerable competitive advantage in the market place by applying this developed ILS framework and associated ILS grounded technological rules. |
| Mattioda, Daniel D. | Internal drivers of external flexibility: A detailed analysis | | University of Oklahoma | | 2007 | AAT 3291931 | This research examines internal logistics flexibility (ILF), i.e., how a supplier is able to meet changing customer demand through its logistics activities. The dissertation follows a three paper format. The first two papers are conceptual pieces, while the third is a case study. The first paper extends previous research on logistics flexibility by identifying from a customer perspective, what a supplier has to do in order to be considered logistically flexible. Research showed that suppliers need physical, human, and organizational capital resources to set a foundation for internal logistics flexibility. Internal logistics flexibility has both a customer orientation and organizational structure component which allow a supplier to understand customer demand and dedicate resources to meet that demand. The second paper develops an assessment tool which managers can use to identify current levels of internal logistics flexibility and areas that need improvement. The internal logistics flexibility assessment tool (ILFAT) is grounded in the strategy-structure-performance framework. The third paper focuses on a food service provider, SYSCO, whose customer orientation strategy puts them in tune with the needs of their customers and has used that insight to build logistics operations focused on fulfilling those needs. A supplier's customer orientation is critically important in meeting customer demand. |
| Thomas, Darrin V. | Alliances as a vehicle for e-business enablement: A study of the antecedents of e-business alliances | | University of Illinois at Chicago | | 2006 | AAT 3233188 | Since the commercialization of the World Wide Web, web technologies and the Internet have allowed companies to perform digital business operations more efficiently and effectively than ever before. However, e-Business enablement, i.e. , the process of transition from a traditional brick-and-mortar organization to a digital brick-and-click firm, has been a daunting task for several firms as it requires specific skills, capital, information, technology, access to markets, and core resources that many firms lack. Many firms have turned to external mechanisms, such as alliances, for building these resources and capabilities. The present study examined (1) the key antecedents of an e-Business alliance formation and (2) sought to understand why firms choose a specific alliance governance structure over other alternatives when participating in an e-Business alliance. We focused on four governance structures: unilateral contractual, bilateral contractual, minority equity and joint venture alliance forms. We found that EBRC (e-Business resources and capabilities) complementarity, resource and business relatedness, mimicking of alliance form and industry, and the three uncertainty measures of firm, partner and environmental uncertainty all appear to have an impact on the alliance form used, with those listed first having the greatest effect. Through cluster analyses, we were able to derive a scenario of when firms would pursue a particular alliance form given all alliance antecedents. |
| VanVactor, Jerry D. | A case study of collaborative communications within the U.S. Army Medical Department logistics community | University of Phoenix | | 2009 | | AAT 3388311 | Health care begins with effective logistical support and when managed effectively, contributes to an enhanced capability that spans a broad spectrum of health care support. The purpose of this mixed method, practice-oriented case study was to explore definitions and understanding of collaborative communication strategies in the management of a health care supply chain. The population studied included a purposive sample of 214 (41%) out of 528 U.S. Army health care logisticians who participated in a survey to develop a common operational definition of collaborative communications in supply chain management. Five themes related to the study included synergy, teamwork, enhancements in supply chain management, the need to continue training throughout a career, and commonalities in views among junior and senior executives as elements of collaborative health care supply chain management practices. The conclusions extrapolated from the study suggested that impressions of collaborative supply chain management practices and processes do not change as one matures in a career. Collaborative supply chain management involves a synergistic work environment wherein multiple parties work together toward the enhancement of supply chain practices and processes. Through the conduct of the study, no relationship could be established between improved supply chain management practices and effective collaborative communication strategies (χ 2 ν = 3.995, p = .046). Likewise, no relationship could be established regarding shared understanding between senior and junior levels of leadership regarding effective collaborative communication and effective supply chain management (χ 2 ν = 5.53, p = .0187). |
| Wang, Ni | Statistical learning in logistics and manufacturing systems | Georgia Institute of Technology | | 2006 | | AAT 3233617 | This thesis focuses on the developing of statistical methodology in reliability and quality engineering, and to assist the decision-makings at enterprise level, process level, and product level. In Chapter II, we propose a multi-level statistical modeling strategy to characterize data from spatial logistics systems. The model can support business decisions at different levels. The information available from higher hierarchies is incorporated into the multi-level model as constraint functions for lower hierarchies. The key contributions include proposing the top-down multi-level spatial models which improve the estimation accuracy at lower levels; applying the spatial smoothing techniques to solve facility location problems in logistics. In Chapter III, we propose methods for modeling system service reliability in a supply chain, which may be disrupted by uncertain contingent events. This chapter applies an approximation technique for developing first-cut reliability analysis models. The approximation relies on multi-level spatial models to characterize patterns of store locations and demands. The key contributions in this chapter are to bring statistical spatial modeling techniques to approximate store location and demand data, and to build system reliability models entertaining various scenarios of DC location designs and DC capacity constraints. Chapter IV investigates the power law process, which has proved to be a useful tool in characterizing the failure process of repairable systems. This chapter presents a procedure for detecting and estimating a mixture of conforming and nonconforming systems. The key contributions in this chapter are to investigate the property of parameter estimation in mixture repair processes, and to propose an effective way to screen out nonconforming products. The key contributions in Chapter V are to propose a new method to analyze heavily censored accelerated life testing data, and to study the asymptotic properties. This approach flexibly and rigorously incorporates distribution assumptions and regression structures into estimating equations in a nonparametric estimation framework. Derivations of asymptotic properties of the proposed method provide an opportunity to compare its estimation quality to commonly used parametric MLE methods in the situation of misspecified regression models. |

**Code 2: Channels** of Distribution

| **Author** | **Title** | **Institution** | **Year** | **Number** | **Abstract** |
| --- | --- | --- | --- | --- | --- |
| Balsevich, Fernando | Essays on producers’ participation, access to and response to the changing nature of dynamic domestic markets in Nicaragua and Costa Rica | Michigan State University | 2006 | AAT 3264133 | This dissertation analyses the relations among tomato and cattle producers and their market channels in Nicaragua and Costa Rica. The first essay analyzes the recent development of supermarket chains, their changes in procurement systems and implications for producers. Then it explores market channels impact on producer's profitability and technology. Results indicate that producers selling to the supermarket chains generate higher profits than producers selling to traditional markets because they are more productive. Producers selling to supermarket chains intensify the use of inputs. However producers selling to the leading and second-tier supermarket chains use a labor bias and capital bias technology respectively as compared to the traditional channel. The second essay focuses on the determinants and effects of the participation of cattle producers in the supermarket channel, export processor channel, and traditional auction channel. It analyzes patterns and supplies of producers by channel using farm level data (from the authors’ survey of farmers in 2004) from 300 farms in the two countries. |
| Cheng, Kuangnen | Vertical integration in airline ticket distribution: A transaction cost analysis | Golden Gate University | 2009 | AAT 3360665 | This empirical study investigates whether vertically integrated firms perform better operationally than non-integrated firms. The setting is the U.S. airline ticket distribution industry. Whether the transaction of ticket distribution should be performed within a firm or across a market has been a long-lasting debate between airlines and travel agencies. To understand what determines where firm boundaries are drawn, transaction cost analysis is performed based on transaction cost economics and vertical integration theory. DEA (data envelopment analysis) is used to assess operational performance by analyzing sixteen years (1992 through 2007) of detailed data. The results reveal that airlines with vertically integrated airline agencies do not necessarily perform systematically better than those without. These findings suggest that the benefit of ownership of the distribution channel cannot improve airline operational efficiency. |
| Fan, Chunxing | On the collaborative planning and scheduling problems | Rutgers The State University of New Jersey, Newark | 2007 | AAT 3293895 | In this research, we study the models, properties, and solution methodologies for the collaborative planning and scheduling problems. The first section analyzes the impact of collaborative channel planning and pricing policies for a supplier-transporter-buyer process with concave transportation cost functions. We prove that the profitability by total-collaboration can be at least twice of what may be achieved in a non-collaborative environment under the given assumptions. The second section analyzes the operational performance of ocean carriers under three operation policies: the non-collaborative, the slot-sharing, and the total-sharing. We observe that as the carriers' willingness to share demand information and resources in a flexible manner increases the effectiveness of collaborative scheduling increases. The third section focuses on the integrated supply-distribution problem involving heterogeneous facilities and multiple customers, each has a period demand over a multi-period planning horizon and a penalty for the shortage. We mathematically prove three properties of the problem, introduce a dominance condition for reducing the search scope, and propose a greedy search algorithm. |
| Feng, Yunfang | Supply chain models and channel strategies for distributing tangible and intangible products with the Internet-enabled market | University of Maryland, Baltimore County | 2008 | AAT 3316086 | Many new business initiatives have emerged to take full advantage of the Internet channel to complement or substitute the traditional channel for business. Our study focuses on the strategic differences between the two channels and identifies conditions under which the drop-shipping channel outperforms the traditional channel. In addition, we develop a model to study the strategic interaction between the two distribution channels for digital products. We further identify conditions when the dual channel outperforms the single channel and when the service-enhanced channel structure dominates the price-only channel structure in terms of the overall channel profits. Finally, we extend our model to deal with demand uncertainty. |
| Jiang, Li | Matching supply with demand in decentralized multi-location systems | University of Michigan | 2006 | AAT 3237983 | In this dissertation, we study several phenomena that have emerged because of newly available advanced infrastructures, with the focus on how to better match supply with demand in decentralized multi-location systems. In Chapter I, we analyze two methods of search initiated respectively by customers and retailers and supported by certain information systems. Using a system of one manufacturer and two retailers, we characterize joint stock and price decisions of retailers, analyze the impact of the two methods on channel behavior, and discuss the preferences of different parties between them. In Chapter II, we analyze the resource investment, stock allocation, and price decision to evaluate the performance of firms and the impact of various market assumptions. In Chapter III, we analyze the impact of online agent on channel structure. |
| Mutlu, Fatih | The transporter's impact on channel coordination and contractual agreements | Texas A&M University | 2006 | AAT 3231654 | This dissertation focuses on the recent supply chain initiatives that enable the coordination of supply chain entities. Recognizing the need for further analytical research in the field of multi-echelon inventory and channel coordination, we developed and solved a class of integrated inventory and transportation models with explicit shipment consolidation considerations. Moreover, we examined transporter-buyer and supplier-transporter-buyer channels and solved centralized and decentralized models for these channels with the aim of investigating the impact of transporters on channel performance. In this dissertation, we also developed efficient coordination mechanisms between the transporter and the other parties in the channel. |
| Visaria, Jay Laxmichand | A model comparing drug utilization and pharmaceutical expenditures in community and mail-order pharmacy in a retiree population | The Ohio State University | 2009 | AAT 3340400 | The objective of this study was to compare drug utilization and pharmaceutical expenditures by simulating the effects of community pharmacy on drug utilization for a retiree patient population using mail order pharmacy. Unit costs and expenditures for the medications in the basket were compared across community and mail-order pharmacy. Seventy two and a half percent of the CDTs dispensed were intended for maintenance therapy and maintenance therapy was more concentrated in mail-order pharmacy as compared to community pharmacy. The use of mail-order pharmacy services resulted in an increase in drug utilization of 2.96% over community pharmacy and a reduction in pharmaceutical expenditures by 10.0-13.0% from 2000-2005. The unit total gross costs in community pharmacy were higher for about half of all products in the comparison basket of products. The differences in pharmaceutical expenditures between community and mail-order pharmacy were explained by differences in acquisition costs, dispensing fees, and administrative costs. |

**Code 3: Customer Service/**Satisfaction

| **Author** | **Title** | **Institution** | **Year** | **Number** | **Abstract** |
| --- | --- | --- | --- | --- | --- |
| Appelqvist, Patrik Bertel | Matching customer demand, offering portfolio and operations system in technology-intensive industries | Teknillinen Korkeakoulu, Helsinki  (Finland) | 2005 | AAT C827476 | This thesis explores how to simultaneously fulfill divergent customer demands and achieve high operational efficiency through co-management of customer needs, offering portfolio, and operations. The research is carried out as a series of collaborative case/action research interventions in three organizations in electronics industry. Research results suggest customer demand as the starting point for operations system design. When customers are buying a product for making it a part of a larger whole, unique offerings delivered via project-oriented operations are needed. When customers are buying the product for its own sake, generic offerings and efficient, process-oriented operations are appropriate. For a company targeting both types of demand, it may be beneficial to design several separate operations concepts. Secondly, the research evaluates pre-defined configurations, product configurability, form postponement and generic resources as tactics for managing the trade-off between a broad offering portfolio and high operational efficiency. For theory, the research provides a model for causal relationships between customer demand, offering portfolio, operations system and performance. Testing of the model testing is suggested as an issue for further research. For management, the thesis provides a structured way of thinking about the complex issues involved in design of offering portfolios and operations systems. |
| Briggs, Elten | An examination into the nature of satisfaction formation in a continually delivered business service context | The University of Oklahoma | 2007 | AAT 3218127 | This research examines the process of customer satisfaction formation in a business-to-business services context where delivery occurs on an ongoing or continual basis. The setting is referred to as a continually delivered services (CDBS) context. The dissertation follows a three paper format. The first paper is a conceptual piece that offers a framework for global satisfaction formation in CDBS contexts. The next two papers are empirical pieces that test different portions of the conceptual framework. Data for both papers were collected from the customers of third-party logistics (3PL) service providers via an online survey instrument. The first empirical piece re-examines the relationship between global satisfaction and loyalty in light of the conceptual framework using structural equation modeling (SEM). The findings suggest that the positive relationship commonly observed between satisfaction and loyalty is more complex in CDBS contexts than has previously been acknowledged. The second empirical piece tests for the importance of velocity performance to satisfaction formation using regression analyses. The findings confirm the importance of velocity performance and illustrate how environmental conditions moderate its influence. |
| Davis, Elizabeth R. | The role of logistics service quality in creating customer loyalty | University of Tennessee | 2006 | AAT 3235470 | This dissertation examines the loyalty phenomenon and to understand the role of logistics service in creating customer loyalty. The main objective is to help companies assess the impact of logistics service in creating loyalty. Logistics service quality is purported to consist of two separate constructs---relational LSQ and operational LSQ. These elements of LSQ drive satisfaction. This research also explores the loyalty phenomenon, which is conceptualized as a causal relationship between affective commitment and purchasing behavior. The strength of this relationship is proposed to be moderated by calculative commitment, which involves the calculation of costs and benefits and the assessment of the investments made in the relationship, along with the availability of alternatives. Further, satisfaction influences the loyalty relationship differently. This research contends that satisfaction has a linear relationship to affective commitment, but its relationship to purchase behavior is nonlinear, being more significant at the extremes. These constructs are defined and operationalized, and by testing its components, along with calculative commitment and satisfaction, different loyalty “types” should be identified. Understanding that firms have a portfolio of different customer relationships, the research should ascertain what conditions drive various types of customer relationships. This research should help distinguish different customer segments based on their loyalty profiles. If the loyalty relationship can be better understood, then managers will have more clarity about how to determine what level of logistics service (as well as other services) to provide to different customer groups. |
| Gallan, Andrew S. | Effects of interorganizational coordination and customer participation on service excellence: Evidence from the healthcare sector | Arizona State University | 2008 | AAT 3327245 | Three separate models were constructed and assessed: (1) a business-to-business model of service partner relations, (2) a model of customer participation's impact on perceptions of a service experience with a focal provider, and (3) a model of service coordination and customer participation's impact on perceptions of coordination and work productivity. In a healthcare context, the models were assessed in three stages. An exploratory qualitative phase, a quantitative pilot survey phase, and a survey-based main study combine to provide insights into interorganizational coordination of service. Results demonstrate that provider partners have limited visibility of the focal provider's efforts, yet customers are able to make clear distinctions between an assessment of their experience with a focal provider and an assessment of the level of coordination between providers. Moreover, higher levels of customer participation provide greater visibility of provider coordination, increasing evaluations of service quality. Finally, it is shown that coordination between partner and focal providers can impact a focal provider's service quality efforts and work productivity. This study transcends dyadic interorganizational theory to establish a foundation for assessing interorganizational service coordination. Additionally, this research contributes an enriched view of interorganizational relations, where coproduction of service includes customer contributions, resulting in value-in-use created with the customer, consistent with many of service-dominant logic's propositions. |
| Skinner, Lauren R. | Maximizing service efficiency: Service culture within the retail supply chain | The University of Alabama | 2007 | AAT 3313745 | The purpose of this research is to examine the importance of both traditional business to consumer competencies and logistics service competencies from the retailer's perspective. The result is better understanding of service culture for the retailer. The development of a retailer service culture encompasses service from both the business to consumer and the business to business perspective, as service culture extends across organizational boundaries within traditional channels. A pilot study was conducted to verify the service culture construct and to assess the nomological validity of the proposed antecedents and consequences of service culture. The results of the pilot study indicate support for a unidimensional measure of service culture. A second study was conducted with key decision makers in various retail positions across the United States to test the conceptual model. The results demonstrate that customer orientation and relationship quality are key influencing factors for the development of service culture. Furthermore, service culture is positively related to increases in market performance and customers’ perceptions of quality for the retailer. |
| Wong, Seng-Fat | A model for minimizing satisfaction gap in partnership development | Hong Kong Polytechnic University (Hong Kong) | 2009 | AAT 3368298 | A numerical relationship model on a knowledge-based ERP methodology is developed as a new objective method of narrowing gaps between different perspectives of good partnership development through harmonizing satisfaction. Communication and interview that capture the tacit knowledge only are implemented by a questionnaire survey of five main service industries in Macau and their sub-contractors. The result has demonstrated that the satisfaction gap is widened by four confusing satisfaction factors (CSF), such as effectiveness, consideration, selling and marketing, and policy. A factor analysis of the CSF has shown that the core-companies have clear cut roles of Pure Social Inferences Type and Pure Economic Inferences Type while their partners are having different expectations. Further full scale analysis extends the findings to develop the above mentioned objective relationship model that recommends corrective actions to narrow the satisfaction gap. Effective knowledge-based indexes derived from the effective grouping of the factor analysis can be used to further enrich the partnership development. |

Code 4: Motor Transportation

| **Author** | **Title** | **Institution** | **Year** | **Number** | **Abstract** |
| --- | --- | --- | --- | --- | --- |
| Chan, Hung C. (Leon) | The stewardship and valuation perspective of multiple work arrangements | University of Houston,  Texas | 2006 | AAT 3222568 | This study investigates three issues related to the multiple work arrangements based on independent contractors and company employees. First, does the concentration of managerial ownership affect the proportion of independent contractors? Second, does the proportion of independent contractors affect the level and the variance of labor productivity? Third, does the proportion of independent contractors provide incremental information over the traditional financial performance measures for forecasting the change in return on assets one year ahead? Using the Motor Carrier Financial & Operating Information database, I first compare the proportion of independent contractors across firms with low levels of managerial ownership, i.e., those that are publicly-traded, and firms with high levels of managerial ownership, i.e., those that are privately-held. The findings suggest that publicly-traded trucking companies on average deploy a significantly higher level of soft capacity than privately-held companies. However, I do not find any evidence for the difference between the publicly-traded and privately-held trucking companies in the change of the proportion of independent contractors when they expect a temporary change in sales. Second, I compare the level and the variance of labor productivity across firms with different proportions of independent contractors. The findings suggest that the proportion of independent contractors is significantly associated with the level and the variance of labor productivity. Third, when changes in asset turnover, changes in profit margin, return on assets and growth in net operating assets are employed to represent traditional accounting information; I find that the proportion of independent contractors provides incremental information about future profitability. These results provide empirical evidence for the influence of concentration of managerial ownership on the multiple work arrangements. The results also provide insight on how production capacity based on multiple work arrangements affects labor productivity and how it can be used to forecast profitability. |
| Dick, Robert M. | The trucking industry and the implementation of the commercial driver's license | University of Nevada, Reno | 2008 | AAT 3339110 | Since the early 1900s, the trucking industry has grown from a small segment of the transportation sector to a major role in the distribution of goods throughout the country. Advances in truck technology and improvements in highway design and construction have made trucks and trucking much safer over the years. However, by the 1970s, carnage on American highways was growing and trucks were contributing to the problem. One of the policies intended to reduce accidents and fatalities caused by trucks was the Commercial Motor Vehicle Act of 1986. The act created federal guidelines for states to follow when issuing a commercial drivers' license. All commercial drivers handling equipment weighing over 26,000 pounds were required to meet federal qualifications for the license. The intent of the law was to increase highway safety by reducing fatalities. This intention was tested by using time series regression over the period from 1975 to 2006 to determine if fatalities and fatal crashes had been reduced. The results indicate that fatalities were reduced by at least 13% and fatal crashes were reduced by 14% at a minimum. Those reductions represent economic benefits of $40 million annually. |
| Doise, Michelle Lee | An integration of corporate culture and strategy: The interrelationships and impact on firm performance | University of Arkansas | 2008 | AAT 3329157 | Independently, corporate culture and corporate strategy have been extensively researched with respect to firm performance, but little is known about how the relationship between culture and strategy affects firm performance. This dissertation will examine the relationship between corporate culture and corporate strategy and its effect on firm performance in the context of the trucking industry. The trucking industry is an ideal setting in which to study these relationships since it represents a significant impact on our economy in terms of its contribution to GDP, employment, safety, taxes, government expenditures, and the ability of firms to competitively move goods from points of import or manufacture through supply chains to points of end use. Furthermore, the trucking industry is extremely competitive, being composed of approximately 500,000 firms, and currently it is facing numerous sources of rising costs making financial performance a critical concern. The literature on corporate culture, corporate strategy and firm performance is reviewed at length resulting in the conceptualization of a model and relevant constructs. It is hypothesized that performance is enhanced when specific culture types are matched with certain strategies. The results of this study confirm that firm performance is greater depending on the fit between certain cultures and certain strategies. |
| Douglas, Matthew Aaron | Commercial motor vehicle driver safety: An application of ethics theory | University of North Texas | 2009 | AAT 3385783 | Safety is an important aspect of ethical, socially responsible logistics. The current research sought to determine how drivers rely on safety norms and perceived consequences in forming safety judgments and behavioral intentions. Furthermore, the study was designed to explore how various factors (i.e., individual, organizational, and regulatory) influence drivers' safety decision-making processes. Specifically, the study sought to answer the broad question, “How do commercial motor vehicle drivers make safety-related decisions, and how do individual, organizational, and regulatory factors influence drivers’ safety decision-making processes?” Multivariate statistical analysis revealed that drivers primarily rely on deontological evaluations in forming safety judgments. Furthermore, drivers primarily relied on safety judgments when forming behavioral intentions. Drivers’ attitudes toward unsafe actions and the effectiveness of driver-related safety regulations were also influential to drivers’ judgments and intentions, respectively. The empirical findings demonstrate to managers that communication and education of safety norms may be highly effective to improve safety in unique occupational contexts where employees are given high levels of responsibility with little physical supervision, and where judgment errors can have devastating consequences for multiple stakeholders. |
| Duan, Peng | An integrated modeling framework for intermodal freight operations in hub cities | Northwestern University,  Illinois | 2006 | AAT 3212782 | In intermodal rail-truck freight transportation, hub city operations are keys to the efficiency of the system. Inefficiencies often arise due to poor planning or coordination among various stakeholders. Drayage operations, terminal operations and traffic management are the three major elements in hub city freight operations, which are closely related. For example, inefficient drayage operations create unnecessary empty truck trips, aggravating traffic congestion and terminal congestion. In the same manner, train arrivals and departures during peak hours often create increased truck traffic that further exacerbates congestion problem. In this dissertation, a framework is developed to model hub city intermodal freight operations and their complex interactions. The model ensures that drayage operations can be considered along with traffic congestion management and terminal operations within a single integrated framework. Three key models are incorporated in this framework, namely, a truck dispatching (drayage) model, a traffic assignment model, and a terminal simulation model. The contributions of this dissertation are: (i) the overall framework design; (ii) an efficient heuristic for truck dispatching problems with varying travel times; and (iii) a truck-car multi-class dynamic traffic assignment model. In addition, a terminal simulation model is incorporated in this framework so that the impact of truck dispatching and traffic congestion on terminal operations can be estimated. Overall, the proposed solution framework introduces a new approach for modeling freight operations in hub cities, with which different operating strategies and scenarios can be evaluated. |
| Goldenberg, James | Three essays on occupational safety | University of Toronto (Canada) | 2006 | AAT NR21899 | The papers that comprise this thesis address two prominent issues affecting workplace safety. The first of the three studies looks specifically at the trucking industry, examining how wage schemes tied into delivery times affect the likelihood of a truck driver being involved in an accident. The remaining two papers investigate workplace violence. One paper examines the length of time away from work for victims of workplace violence. Hazard models were estimated using data from (non-fatal) work-related injuries that were the result of workplace violence between 1996 and 1999 in the Canadian province of Ontario drawn from the administrative records of the Workplace Safety & Insurance Board (WSIB). The results of the study indicate that the greater the severity of the injury, as measured by total health care expenditures, the longer the absence from work. Furthermore, the most violent acts are associated with the largest decreases in the hazard rate and result in the longest absences. Finally, there were statistically significant differences in the duration of work absences by occupation, holding other factors constant. The final workplace violence paper uses the same Ontario WSIB data to calculate some of the financial costs associated with acts of workplace violence. A descriptive summary of the total claim payments broken down wage benefits and healthcare payments indicate that for the most part the highest dollar amounts were associated with the most severe forms of physical violence, shootings, stabbings, and sexual assaults. Whether it is the pressure of payment based on unreasonable performance, or working under the threat of violence, the information provided in these studies help to quantify some of the consequences of demanding and dangerous work-related experiences. |
| Ha, Byoung-Chun | Strategic collaboration with motor carriers and the effect on managers' perceptions of firm performance | The George Washington University | 2007 | AAT 3259289 | In an effort to understand strategic collaboration in transportation service supply, this research attempts to identify significant areas of strategic collaboration between motor carriers and shippers, and the way these areas affect managers' perceptions of organizational performance. An online survey with U.S.-based manufacturing and distribution firms was conducted to gather necessary data. The first step of the study was to use the survey results to detect the significance of selected strategic collaboration variables, including length of relationship, benefit/burden sharing, joint team operation, skill/knowledge sharing, equipment/facility sharing, shared decision making, compatible software implementation, and information sharing. Then, managers' perceptions of improvements in motor carriers' service performance after strategic collaboration with shippers was evaluated in several areas, such as order fill rate, transit time and variability, service flexibility, service diversity, freight rate, freight damage and loss rate, claim processing and restitution, and quality of information provided. Managers' perceptions of improvements in shippers’ supply performance after strategic collaboration with motor carriers was also measured in several areas, including order fill rate, order fulfillment lead-time and variability, production flexibility, total logistics cost, inventory turnover rate, on-time delivery, and rate of returns. Finally, the research tested causal relationships between strategic collaboration and improvement in motor carrier service performance, and between strategic collaboration and improvement in shipper supply performance, using path analysis with latent variables. |
| Hejazi, Behrang | Dynamic decision making for less-than-truckload trucking operations | University of Maryland, College Park | 2009 | AAT 3359278 | On a typical day, more than 53 million tons of goods valued at about $36 million are moved on the US multimodal transportation network. An efficient freight transportation industry is the key in facilitating the required movement of raw materials and finished products. Intelligent transportation system (ITS) technologies increase the flow of available data, and offer opportunities to control the transportation operations in real-time. Some research efforts have considered real-time acceptance/rejection of shipping requests, but they are mostly focused on truckload trucking operations. This study tries to use real-time information in decision making for LTL carriers in a dynamically changing environment. The dissertation begins with an introduction of LTL trucking operations and different levels of planning for this type of motor carriers, followed by the review of literature that are related to tactical and operational planning. Following a brief discussion on multi commodity network flow problems and their solution algorithm, a mathematical model is proposed to deal with the combined shipment and routing problem. Furthermore, a decision making procedure as well as a decision support application are developed and are presented in this dissertation. The study suggests that significant reductions in operational costs are expected as the result of using the proposed decision making procedure. |
| Humphrey, Anthony S. | Addressing freight imbalance in the truckload trucking industry through hierarchical planning | University of Louisville, Kentucky | 2006 | AAT 3228027 | Freight imbalance is a problem that negatively affects drivers and carriers within the truckload trucking industry. One result of this problem is that the industry experiences high annual driver turnover, exceeding 130% annually. The turnover can be attributed in part to driver dissatisfaction due to the inability of the carriers to provide regular driving tours as a result of freight imbalance. However, due to the complexity of the imbalance, carriers have difficulty combating the problem. This dissertation examines three problems addressing freight imbalance from a hierarchical planning perspective. The Weekend Draying Problem focuses is an operational planning approach for addressing weekend truckload dispatching. The application of this methodology to a nationwide trucking network reveals that a carrier can experience significant customer service improvements while at the same time meeting the needs and expectations of their drivers. As a result, more regular driving tours can be established. Collectively this dissertation demonstrates ways to address freight imbalance both in the short term planning horizon and the long term planning horizon. |
| Johnston, Ahren N. | An examination of the cost of service in the motor carrier industry | University of Arkansas | 2009 | AAT 3374246 | Shippers demand constantly improving service levels from their carriers in order to minimize increases to shipment lead times and safety stock levels caused by late shipments and damage to shipments while in transit. In regards to a general relationship between cost and quality, there are two opposing viewpoints. The traditional view is that quality is costly and that the cost of quality increases at an increasing rate as service quality increases. However, the “Quality is Free” view maintains that higher quality can actually be realized at a reduced cost by “doing it right the first time”. This study incorporates both of these viewpoints into an examination of the cost of service quality in the motor carrier industry. This study theorizes that service quality is a two dimensional construct that is defined as the adherence to measurable standards that result in the superiority of service. The two dimensions are physical/capacity and human performance. The physical/capacity dimension represents aspects of service quality that can be improved by investing in equipment (e.g. number of tractors or more rigorous maintenance schedule) or other areas. The human performance dimension represents aspects of service quality that can be improved by having employees who are well trained and motivated to provide higher quality service. This study proposes that the physical/capacity dimension of service can be described using the traditional view that quality is costly, and the human performance dimension can be described using the view that “Quality is Free.” Specifically, this study proposes that costs associated with the physical/capacity dimension of quality increase as service quality increases while costs associated with the human performance dimension decrease or remain constant. The results of the statistical analysis support the proposals of this study. There is a positive relationship between operating costs and the physical/capacity dimension of quality. If a company invests in additional capital to improve their service quality, costs should increase. This is consistent with the traditional view of the cost of quality. There is also a negative relationship between operating costs and the human performance dimension of quality. If employees do their job right the first time, there will be no need to correct mistakes, and costs should decrease. This is consistent with the “Quality is Free” view of the cost of quality. The managerial implications are to provide managers a better understanding of the cost of quality and another tool that can be used to effectively and efficiently manage quality. The results of this study will also help with the development of cost benefit analyses of potential quality improvement initiatives. |
| Karacik, Burak | Driver management for less-than-truckload carriers | Georgia Institute of Technology | 2007 | AAT 3261661 | The trucking industry is vitally important to the economy. Chapters II and III describe a scheme for the dynamic scheduling of linehaul drivers developed for one of the largest LTL carriers in the United States. The technology developed in this dissertation combines greedy search with enumeration of time-feasible driver duties, and is capable of generating cost-effective driver schedules covering 15,000--20,000 loads in a matter of minutes. The driver schedules satisfy a variety of real-life driver constraints, including U.S. DOT hours-of-service requirements (Chapter II) and union rules (Chapter III). Computational experiments justify the algorithmic design choices, and a comparison with real-world dispatch data from the LTL carrier indicates that the technology produces high-quality driver schedules. Chapter IV describes a tactical tool for determining the allocation of drivers in a trucking terminal network. One of the key tactical questions faced by an LTL carrier is how many drivers to locate (or domicile) at each terminal. Determining an effective driver allocation can be especially difficult due to union rules. Most carriers are unionized and a portion of their drivers, called bid drivers, can only move loads between their domicile (home location) and a designated region. The driver allocation technology developed determines the number of drivers to allocate to each terminal as well as the designated region for each bid driver. Computational experiments using truck movement data representative of operations at a major U.S. LTL carrier demonstrate the effectiveness of our domiciling methodology, and show that union restrictions may result in substantially larger driver fleets, in some cases even up to 50% larger. Chapter V, the final part of the thesis, investigates questions related to the number of drivers required to fulfill a given set of loaded truck moves in a more academic setting in order to obtain some fundamental insights. The goal is to determine the minimum number of drivers required to cover all the loaded moves, and the resultant dispatch schedule for these drivers. |
| Ko, Byungkon | Identification of preferred performance measures for the assessment of truck level of service | University of Florida | 2007 | AAT 3271157 | The current Highway Capacity Manual (HCM) provides analytical methods to evaluate performance levels of transportation facilities and estimate Level Of Service (LOS) perceived by the users. The HCM methodologies yield a single LOS value for all the users in a traffic stream. However, due to the unique size and operating characteristics of trucks, it is possible that truck mode users perceive LOS on various roadway facilities based on different criteria from those of the other mode users. This study focused on identifying the determinants of LOS perceived by truck mode users and measuring their relative importance based on which truck LOS estimation methodologies should be developed. The quality of a truck trip generally was found to depend on three issues: travel safety; travel time; and physical and psychological driving comfort. Truck drivers showed more concerns about the driving comfort, while truck company managers were more concerned with travel time. The travel safety aspect of a truck trip was a major concern for both groups. ‘Speed Variance’ and ‘Pavement Quality’ were the two most important determinants of truck trip quality on freeways. Truck trip quality on arterials was a function of multiple factors including ‘Pavement Quality’, ‘Turning Maneuvers’, ‘Speed Variance’, and ‘Traffic Density’. ‘Percent-Time-Being-Followed (PTBF), ‘Percent-Time-Spent-Following’ (PTSF), ‘Travel Lane and Shoulder Widths and their Pavement Quality’ were identified as truck LOS determinants on two-lane highways. Among many factors contributing to the quality of a truck trip, ‘Passenger Car Drivers’ ‘Road Etiquette’ and ‘Knowledge about Truck Driving Characteristics’, ‘Traffic Congestion’, and ‘Frequency and Timing of Construction Activities’ were perceived to be in significant need of improvement regardless of the type of roadway facility. Truck travel restrictions (e.g., truck lane restrictions) on freeways, inadequate curb radii and poor traffic signal coordination on arterials, and inappropriate shoulder width and condition and poor night-time lighting condition on two-lane highways were also considered to be greatly in need of improvement. The results of this study provide the FDOT with guidelines and recommendations to develop truck LOS estimation methodologies to effectively assess how well it is addressing the needs of freight transportation on the state roadway system and offer transportation service providers and other stakeholders valuable insights for the prioritization of transportation improvement projects for commercial truck traffic. |
| Kulkarni, Chintamani Vasant | Modeling and the performance analysis of transportation refrigeration units with alternate power systems | University of California, Davis | 2007 | AAT 3303171 | In this research a model of Trailer Refrigeration Units (TRUs) has been developed to quantify the fuel economy and emissions benefits of potential alternative power systems. Trailer refrigeration units (TRUs) are refrigeration systems typically powered by an auxiliary diesel engine and are used to deliver temperature sensitive (fresh and frozen food) products. In this paper we have developed a MATLAB/Simulink based modeling of TRUs, and we have used the model to quantify the benefits of alternative power systems. The simulation model consists of a transient thermal modeling of TRUs that is coupled to the APU. The diesel engine emission map was developed empirically and incorporated into the model. From the simulations it was observed that the TRU duty cycles, energy consumption, and emissions are highly influenced by the ambient operating temperatures. |
| Kuppa, Shankara | Load planning problem: Introduction, applications and results | University of Michigan | 2007 | AAT 3276214 | Freight transportation is an important sector in the US economy and Less-than Truck Load (LTL) carriers are an important segment of the transportation industry. The complex planning process faced by LTL carriers is typically broken down into a series of subproblems. The output of one subproblem is the input for the next step, and once the solution to a stage is set, it is not altered again later. Since each stage has an effect on the overall objective costs, a rigid approach tends to lose track of the tradeoffs involved amongst these subproblems.In our current research, we define the Load Planning Problem (LPP) by integrating shipment and container routing with some parts of the subsequent equipment balancing stage and model the associated operational constraints such as service-time and unique-path restrictions. For the first time truck-balance constraints are included at this early a stage. The LPP is considered at the strategic planning level in order to evaluate different what-if scenarios that large-scale LTL carriers might encounter. We present several integer programming based approaches to address the LPP, including a column generation based technique and a novel day-expansion based IP formulation by expanding the network such that any shipment flow obtained from the transformed network satisfies service-time requirements. We propose heuristic search algorithms based on these EP formulations. We validate our solution approaches by testing the algorithms developed on realistically-sized datasets obtained from a leading small package carrier. The day-expansion based approach produced an average savings of 5.5% over the starting solutions provided by the carrier. Given that even a single percentage of savings on these datasets potentially translates to millions of dollars of savings annually for the carrier, these results hold good potential. |
| Miori, Virginia Marie | Dynamic programming applied to a new formulation of the stochastic truckload routing problem | Drexel University, Pennsylvania | 2006 | AAT 3209800 | This thesis focuses on vehicle routing and scheduling, more specifically the truckload routing problem (TRP). We include the consideration of time windows (TRPTW). In the TRPTW, each vehicle carries a single load which fulfills either the cubic volume or weight capacity of the equipment. The demand for these loads is stochastic. The continuous flow TRPTW looks beyond traditional out and back routing by building extended routes which combine origin/destination pairs. Rather than returning directly to its domicile, a vehicle will instead proceed on to pick-up and deliver a subsequent load, which may take it even farther from the domicile. Each vehicle stays out on the road for as long as allowable by the various scenarios presented in the Department of Transportation (DOT) hours of service (HOS) restrictions. This research presents an approach to the formulation of the TRPTW which allows the use of optimization through penalty methods and dynamic programming. The traditional lane definition (origin/destination pair) has been extended. We create triplets composed of two lanes in succession which represent (1) a loaded movement and (2) the necessary follow up movement to position for the next load. The triplet provides a natural way of addressing the stochastic demand. The termination point of a triplet in a route always corresponds to the initial point of the subsequent triplet. The value of this research exists in the presentation of a new model formulation of the TRP which integrates count data analysis into the approach while taking into account real-world constraints. The movement of freight in the TRP is modeled more intuitively using triplets, resulting in greater applicability. This value of this approach is also seen in extensions of to other areas of supply chain management and network modeling. |
| Morris, Steven M. | Truck dispatching and fixed driver rest locations | Georgia Institute of Technology | 2007 | AAT 3294525 | This thesis sets out to analyze how restricting rest (sleep) locations for long-haul truckers may impact operational productivity, given hours-of-service regulations. Productivity in this thesis is measured by the minimum number of unique drivers required to feasibly execute a set of load requests over a known planning horizon. When drivers may stop for rest at any location, they may maximize utilization under regulated driving hours. When drivers may only rest at certain discrete locations, their productivity may be diminished since they may no longer be able to fully utilize available service hours. These productivity losses may require trucking firms to operate larger driver fleets. This thesis addresses two specific challenges presented by this scenario; first, understanding how a given discrete set of rest locations may affect driver fleet size requirements; and second, how to determine optimal discrete locations for a fixed number of rest facilities and the potential negative impact on fleet size of non-optimally located facilities. The minimum fleet size problem for a single origin-destination leg with fixed possible rest locations is formulated as a minimum cost network flow with additional bundling constraints. A mixed integer program is developed for solving the single-leg rest facility location problem. Tractable adaptations of the basic models to handle problems with multiple lanes are also presented. This thesis demonstrates that for typical long-haul lane lengths the effects of restricting rest to a relatively few fixed rest locations has minimal impact on fleet size. For an 18-hour lane with two rest facilities, no increase in fleet size was observed for any test load set instances with exponentially distributed interdeparture times. For test sets with uniformly distributed interdeparture times, additional required fleet sizes ranged from 0 to 11 percent. The developed framework and results should be useful in the analysis of truck transportation of security-sensitive commodities, such as food products and hazardous materials, where there may exist strong external pressure to ensure that drivers rest only in secure locations to reduce risks of tampering. |
| Namboothiri, Rajeev | Planning container drayage operations at congested seaports | Georgia Institute of Technology | 2006 | AAT 3233567 | This dissertation considers daily operations management for a fleet of trucks providing container pickup and delivery service to a port. Truck congestion at access points for ports may lead to serious inefficiencies in drayage operations, and the resultant cost impact to the intermodal supply chain can be significant. Recognizing that port congestion is likely to continue to be a major problem for drayage operations given the growing volume of international containerized trade, this research seeks to develop optimization approaches for maximizing the productivity of drayage firms operating at congested seaports. Specifically, this dissertation addresses two daily drayage routing and scheduling problems. In the first half of this dissertation, we study the problem of managing a fleet of trucks providing container pickup and delivery service to a port facility that experiences different access wait times depending on the time of day. We develop a time-constrained routing and scheduling model for the problem that incorporates the time-dependent congestion delay function. The model objective is to find routes and schedules for drayage vehicles with minimum total travel time, including the waiting time at the entry to the port due to congestion. Finally, we use the framework to develop an understanding of the potential impact of congestion delays on drayage operations, and the value of planning with accurate delay information. In the second half of this dissertation, we study methods for managing a drayage fleet serving a port with an appointment-based access control system. We develop a drayage operations optimization approach based on a column generation integer programming heuristic that explicitly models a time-slot port access control system. The approach determines pickup and delivery sequences with minimum transportation cost. Findings indicate that the set of feasible drayage tasks and the fleet size required to complete them can be quite sensitive to small changes in time-slot access capacities at the port. |
| Ni, Na | Configurations of competitive strategies and resources: A set-theoretic approach | University of Manitoba (Canada) | 2008 | AAT NR49112 | A plethora of research across various fields of management has proposed a variety of reasons to explain the success many firms enjoy. The competitive positioning school (Porter, 1980, 1985) recognizes the value of business-level strategies associated with high performance; however, it focuses on external orientation while ignoring the role of internal attributes, such as resources. By integrating the competitive positioning school and the resource-based view of the firm (Barney, 1991), this study aims to address the following substantive question using a configurational perspective: what configurations of competitive strategies and resources are likely to lead to a high level of firm performance? Results of the study are as follows: (1) All configurations that are associated with high firm performance involve customer responsiveness strategies. (2) The following configurations enable firms to achieve high performance with respect to the five *perceptual* measures (i.e., quality, timeliness, flexibility, efficiency, and resource acquisition): customer responsiveness strategies by themselves or when combined with operations & logistics resources; or with innovation strategies coupled with both resources (i.e., management & human resources, and operations & logistics resources). (3) Customer responsiveness strategies, together with management & human resources, contribute to both *perceptual* and *financial* measures of firm performance. (4) Hybrid strategies (i.e., the combined strategies of low cost, innovation, and customer responsiveness) are used to achieve high efficiency as well as financial performance with both resources as necessary conditions. (5) Firms may find it useful to emphasize the co-alignment of resources with competitive strategies. Configurations combining strategies with resources appear to be more dominant than those that include either strategies or resources by themselves. (6) A set-theoretic approach appears to have excellent promise for integrating qualitative and quantitative methods to develop and examine a configurational approach to organizations in the future. |
| Nowak, Maciek A. | The pickup and delivery problem with split loads | Georgia Institute of Technology | 2005 | AAT 3183243 | This dissertation focuses on improvements in vehicle routing that can be gained by allowing multiple vehicles to service a common load. We explore how costs can be reduced through the elimination of the constraint that a load must be serviced by only one vehicle. Specifically, we look at the problem of routing vehicles to service loads that have distinct origins and destinations, with no constraint on the amount of a load that a vehicle may service. We call this the Pickup and Delivery Problem with Split Loads (PDPSL). We model this problem as a dynamic program and introduce structural results that can help practitioners implement the use of split loads, including the definition of an upper bound on the benefit of split loads. This bound indicates that the routing cost can be reduced by at most one half when split loads are allowed. Furthermore, the most benefit occurs when load sizes are just above one half of vehicle capacity.We develop a heuristic for the solution of large scale problems, and apply this heuristic to randomly generated data sets. Various load sizes are tested, with the experimental results supporting the finding that most benefit with split loads occurs for load sizes just above one half vehicle capacity. Also, the average benefit of split loads is found to range from 6 to 7% for most data sets. The heuristic was also tested on a real world example from the trucking industry. These tests reveal the benefit of both using split loads and allowing fleet sharing. The benefit for split loads is not as significant as with the random data, and the various business rules added for this case are tested to find those that have the most impact. It is found that an additional cost for every stop the vehicle makes strictly limits the potential for benefit from split loads. Finally, we present a simplified version of the PDPSL in which all origins are visited prior to any destination on a route, generalizing structural results from the Split Delivery Vehicle Routing Problem for this problem. |
| Park,  Sang-Woo | Modeling motor carrier crash risk with variable schedules over multiple days | The Pennsylvania State University | 2006 | AAT 3229331 | This study examines seven consecutive days driving logs for the 1980s and 2004. This study found that accidents are strongly associated with driving time (time on task). Moreover, nighttime driving schedules yield higher accident risk than the other driving schedules. Particularly, drivers who take less rest time between two shifts yield higher accident risk. Also, experienced drivers (greater than or equal to 10 years) have a 15 percent lower accident risk than less experienced drivers (less than 10 years) driving at regular nighttime. However, when drivers have driven for three consecutive days, the regular driving schedules, except for the nighttime driving schedules, and the irregular driving schedules do not show a strong association with driving experience. However, for the experience variable, drivers with more than 10 years of experience have around 40 percent lower crash risk than drivers with less than 10 years of experience. Therefore, the experience is associated with the driving time. Particularly, the heavy schedule drivers who have driven for many driving hours every day have little chance to recover from fatigue. The results show that drivers who had driven more than eight hours for three consecutive days (heavy schedule) have over a 25 percent higher accident risk than driver who have driven less than eight hours for three consecutive days (light schedules). When drivers with a heavy driving duration have driven for three consecutive days, the results show that the effect of the heavy schedule is the same for experienced drivers and less-experienced drivers. Therefore, when drivers with heavy driving duration have driven for consecutive days, they may experience a decline in driving performance. Usually, drivers who use sleeper berth operation (sleep in their trucks) do not obtain the same quality of sleep as if they were sleeping at home. For the 2004 dataset, a series of models indicate that the pattern of crash risk is different for non-sleeper operations than for sleeper schedules. Models of non-sleeper operations indicate that crash risk is strongly associated with multi-day driving somewhat stronger than with driving time. Models of sleeper operations indicate strong association of crash risk and driving time. Interestingly, within sleeper berth operations, there is much less association of crash risk with regular schedules and substantial risk associated with irregular schedules. These findings help to provide a baseline estimate of crash risk relationships for the new hours of service policy initiated in 2004. |
| Regehr, Jonathan David | Exposure modeling of productivity-permitted general freight trucking on uncongested highways | University of Manitoba, Canada | 2009 | AAT NR64307 | The research designs, develops, validates, and applies an exposure model of productivity-permitted general freight trucking on uncongested highways. Productivity-permitted general freight trucks (long trucks) are multiple trailer configurations, consisting of van trailers, which exceed basic vehicle length limits but operate within basic weight restrictions. The three predominant long trucks in North America are Rocky Mountain doubles (Rockies), Turnpike doubles (Turnpikes), and triple trailer combinations (triples). Long trucks have been used in Canada since the late 1960s. Recent highway investments in the Canadian Prairie Region have effectively completed the network on which long trucks are allowed to operate. Despite widespread use of long trucks for many years and these recent infrastructure investments, there is a knowledge deficiency about long truck exposure. The research uses the transportation systems analysis approach to design, develop, and validate the long truck exposure model. Exposure is expressed as an explanatory variable in three principal dimensions (volume, weight, and cube), which is needed for predicting transportation system impacts of long truck operations. The research applies the model to clarify issues that should be considered in establishing charges for long truck permits, determining long truck safety performance, and developing load spectra for long trucks. The exposure model relies on a unique dataset that integrates output from a classification algorithm, field observations, and industry intelligence. The results indicate that long trucks travelled 67 million kilometres on a 10,000 centreline-kilometre highway network in the Canadian Prairie Region in 2006. The model demonstrates strong temporal and geographic concentration of long truck travel on the network. Application of the results reveals the following findings: (1) Decisions about establishing long truck permit charges are supported by consideration of options within a revenue adequacy rationale that are sensitive to freight density and the distance travelled by long trucks. (2) The exposure-based collision rate for Turnpikes is half of the collision rate for Rockies, about one-third of the rate for legal-length articulated trucks, and one-quarter of the rate for triples. (3) The model provides loading indicators required for pavement and bridge design and evaluation procedures and demonstrates the cubic orientation of long truck operations. |
| Satir, Salim | Improving the transportation operation efficiency of full trailer load linehaul movements for a large scale company with spatially scattered multi terminals | University of New Brunswick (Canada) | 2007 | AAT NR49824 | The efficiency of transportation operations is one of the factors having a significant effect on the country's economic growth. This thesis constitutes the research that was completed based on a case study for Day and Ross Inc. (D & R) to develop and implement an Optimization Model to improve the efficiency of general linehaul trucking operations. D & R is one of the biggest Canadian trucking companies, which provides service in the US as well as to 41 spatially scattered terminals across Canada through its linehaul operations. The lack of software specifically designed for linehaul planning and scheduling motivated the development of an Integrated Optimization System that could primarily assist planners in making their daily operational decisions and also help in reducing the total operating cost of any linehaul trucking company. This System can also assist the Management in making tactical and strategic decisions. The four major quantifiable factors contributing to the total operating cost in linehaul operations are the full miles, empty miles, brokered miles, and wait-time cost. The Optimization Model was developed to minimize the total operating cost by taking all essential decision variables into account, by increasing the full miles while minimizing the empty miles, brokered miles, and wait-time cost. The final results show that using the Optimization System developed in this research can achieve an approximate 4.8% reduction in the total operating cost. This translates into approximately $6.5 million in savings for D & R for the year 2005, if the system had been used instead of existing manual planning methods. |
| Soliman, Ahmed S. M. | Analysis of local traffic-air quality in northwest Indiana adjacent to the Borman Expressway | Purdue University, Indiana | 2005 | AAT 3198156 | The purpose of the study was to quantify the impact of traffic conditions such as free flow and congestions on local air quality. The Borman Expressway in Northwest Indiana is considered a test-bed for this research due to the high volume of class-9-truck traffic traveling on it, as well as the existing and continuing installation of the Intelligent Transportation System (ITS) to improve the traffic management along the highway stretch. An empirical Traffic-Air-Quality model (TAQ model) was developed to estimate the PM 2.5 emission factors (g/mi) based solely on the measured traffic parameters such as average speed, average acceleration and truck density. The TAQ model has shown better predictions that matched the measured emission factor values more than the EPA-PART5 model. During congestions (speeds < 30 mi/h), the TAQ model, on average, over predicted the measured values by 1.2 folds, in comparison to the 4.0 folds under predictions of the EPA-PART5 model. On the other hand, during free flow (speeds > 50 mi/h), the TAQ model, on average, over predicted the measured values by 1.5 folds. The measured values as well as the TAQ model have shown that the PM 2.5 emission factors change more aggressively with respect to the average truck speeds on the Borman Expressway more than the EPA-PART5 model predictions which assume constant emission values with respect to speed. On average a 74% improvement in air quality is expected when the average Borman speed range is improved from <30 mi/h to >50 mi/h (based on reduction of mass emitted per mile [g/mi]).An autoregressive (AR) model was also developed to forecast hourly averaged emission factors using the TAQ model. The AR-TAQ model has shown the ability to predict PM 2.5 emission factors based on traffic parameters. |

Code 5: Rail Transportation

| **Author** | **Title** | **Institution** | **Year** | **Number** | **Abstract** |
| --- | --- | --- | --- | --- | --- |
| Anderson, Mats | Empirical essays on railway infrastructure costs in Sweden | Kungliga Tekniska Hogskolan, (Sweden) | 2007 | AAT C829481 | The thesis consists of five papers. In paper I, the data situation for planning railway maintenance and renewal is surveyed internationally. The survey indicates that most infrastructure managers are still in the data gathering phase, rather than ready to use modern computerized planning tools to make sound decisions in the field of maintenance and renewal. In paper II, we investigate the data situation for infrastructure cost analysis in Sweden. A panel data set that consists of cost, traffic and infrastructure information is created. Three main cost categories are identified; infrastructure operation, maintenance and renewal. In paper III, we turn to unobserved effects models to exploit data heterogeneity. Finally in paper V, a dynamic generalized method of moments estimator is used to explore a potential dynamic cost dependency. The main findings are that the POLS approach, which has been used in similar studies in Europe recently, is rejected in favor of fixed effects estimation for this data. Furthermore, we also reject the idea of regression analysis to capture marginal rail renewal costs. In paper IV, we suggest an analytical expression combined with survival analysis of rail ages to estimate marginal renewal costs. We derive elasticities with respect to output as well as marginal costs for the different cost categories, and find that the current charge for wear and tear in Sweden is well below these new estimates. This opens up for increased, marginal cost based rail infrastructure wear and tear charges, which would reduce the financial burden on Swedish tax-payers. |
| Blodgett, Brian D. | **Exploring the rerouting of rail transported hazardous materials away from metropolitan areas** | North Central University, Arizona | 2008 | AAT 3335327 | City council members throughout the United States are concerned about a terrorist attack against a train hauling hazardous material that could potentially kill and/or injure thousands. The District of Columbia’s Legislators passed a law requiring trains hauling hazardous materials to be rerouted around the city. This study examined the cumulative risk associated with transporting hazardous materials over the existing route through the District of Columbia, as well as evaluating the overall risk along alternate routes that traverse Maryland, Virginia, and/or West Virginia but avoid the District of Columbia. The findings, which show that rerouting hazardous materials away from metropolitan areas will lower the risk in that specific area but increase the risk to other areas, could be used by the railroad industry and by communities in determining the effects that rerouting hazardous materials will have on the cumulative risk associated along an existing or planned route. |
| Bontekoning, Yvonne Margaretha | Hub exchange operations in intermodal hub-and-spoke networks: Comparison of the performances of four types of rail-rail exchange facilities | Technische Universiteit Delft (Netherlands) | 2006 | AAT C823538 | The implementation of hub-and-spoke networks in intermodal transport is suggested as one of the potential solutions for helping to increase the intermodal market share. Traditionally, trains are shunted at hubs; this is a time-consuming process. Since the early 1990s a new type of intermodal terminal, specifically designed for fast transshipment at nodes in hub-and-spoke networks, has been introduced in Europe. These hub terminals could replace this time-consuming shunting. Studies on the new hub terminals suggest that they may perform more efficiently than shunting yards. However, a systematic comparison to reveal the operational and costs differences between shunting and these new hub-terminals for a broad range of situations still lacks. The main objective of the study was to develop a model to identify favourable operational conditions for new hub terminals to be implemented and to quantify their operational performances in relation to alternative hub exchange facilities. Simulation models were developed to study rail-rail exchange operations at new hub-terminals, hump and flat shuntings yard and road-rail terminals. |
| Cramer, Barton Emmet | North American freight rail: Regulatory evolution, strategic rejuvenation, and the revival of an ailing industry | The University of Iowa | 2007 | AAT 3258564 | North American railways were crucial to the integration of national territories from the mid-1850s through the 1920s. From the 1920s, rail’s dominance in transportation declined as highways and trucking developed. From the 1970s, however, a dramatic shift began as three prongs of economic liberalization were implemented: deregulation of the industry, privatization of state-owned firms, and the liberalization of controls on foreign direct investment. This dissertation characterizes the liberalized governance regimes that have emerged, evaluates changes in the industrial and geographic organization of the freight rail industry, and examines significant episodes of regional rail restructuring involving the dominant Class I firms. Shifts in governance are examined by outlining pre-reform regulatory regimes in the US, Canada, and Mexico, then discussing the step-wise sequence of changes enacted in each country that significantly reduced restrictions on freight rail firms' business options. Liberalized governance enabled changes in the industry's organization, including its firm-size distribution, privatization of state-owned firms, and consolidation, as firms employed hitherto restricted strategies to restructure their assets and activities. Case studies of regional restructuring, designed to highlight the interplay of regulatory governance, intra-industry competition, and firm strategies, include: the consolidation of firms in the Eastern US and the privatization of Conrail; the consolidation of firms in the Western US and the impact of increased rail container traffic on infrastructure and operations; the expansion of freight rail ownership, investment, and traffic patterns integrating the NAFTA countries; and comparison of the strategies adopted by CPR and CN, the dominant Canadian firms. |
| Diop, Mbaye | Affectation de locomotives aux trains avec contraintes d'entretien et de carburant | Ecole Polytechnique, Montreal (Canada) | 2006 | AAT NR20823 | In this thesis, we consider the problem of assigning locomotives to a large number of trains scheduled over a one-week or a one-month horizon while taking into account maintenance and, possibly, fueling constraints. The objective consists of minimizing first the total number of locomotives used, second the total operational cost including the distance traveled in light moves and in deadhead, and last delayed maintenances with respect to the minimum distance between two maintenances. Each locomotive represents a commodity and is associated with a timespace network. Instead of developing a generic approach for all locomotive types, we develop a first approach for the problem of assigning electric locomotives and a second one for the problem of assigning diesel locomotives. These last locomotives need fueling about once per day and maintenance less frequently. The first approach works when short time maintenances like fueling is not considered. The second one is an extension of the first which includes a special treatment of the fueling constraints. Given the size of the instances to solve for the electric locomotives, we propose a solution approach based on several decomposition strategies. Firstly, the planning horizon is discretized into overlapping time slices and a reasonable-sized problem is solved for each slice. Secondly, a small integer linear problem is solved to identify locomotives that need maintenance during the current time slice. These locomotives are said to be critical and the others non-critical. The routing of the critical locomotives is then performed sequentially by solving, for each of these locomotives, a shortest path problem with resource constraints. Finally, the non-critical locomotives are routed simultaneously by solving an integer linear problem. |
| Kuo, April  Yi-Wen | Multi-carrier track capacity allocation in forward and spot markets of freight transport | University of Maryland, College Park | 2008 | AAT 3297409 | This dissertation addresses multi-carrier, multi-line train scheduling problems for forward and spot markets. Schedules resulting from solution of these train scheduling problems enable carriers to make customer commitments for serving forward contracts and to transport one-off-loads arising on spot markets. A train slot selection model based on multicommodity network flow concepts is developed for determining timetables for use in forward markets and a column generation methodology is proposed for its solution. The model considers needs of both shippers and carriers. The methodologies were specifically intended for solving large, real-world train scheduling problems. |
| Lai, Yung-Cheng | Increasing railway efficiency and capacity through improved operations, control and planning | University of Illinois at Urbana Champaign | 2008 | AAT 3314828 | The focus of my dissertation is to increase railway efficiency and capacity through improved operations, control and planning. Various analyses based on operations research techniques, and capacity analysis methodologies were conducted for optimizing the aerodynamic efficiency of intermodal freight trains and railway capacity planning. Intermodal freight recently surpassed coal to become the largest segment in terms of revenue for US freight railroads. However, intermodal trains are the least fuel efficient trains due to the physical constraints imposed by the combination of loads and the railcar design. Ironically, they are typically the fastest freight trains operated. This calls for investigation of the aerodynamic effects and options to improve aerodynamic efficiency that have important economic and environmental implications for this segment of rail freight traffic. In chapter 2, I investigate basic options for improving the energy efficiency of intermodal trains. It is concluded that slot utilization, slot efficiency, and filling empty slots all have beneficial effects. In addition, a train can be more efficiently operated if loads are assigned not only based on slot utilization but also better matching of intermodal loads with cars, which we term "slot efficiency". I then present an IP model (Aerodynamic Loading Assignment Model (ALAM)) that incorporates the aerodynamic characteristics to enable optimization of the loading patterns to maximize fuel efficiency (chapter 3). Several policy recommendations regarding railway intermodal operations are also developed in chapter 3 based on a series of scenario analyses. The potential annual savings in fuel consumption through use of ALAM by one large railroad on one of its major intermodal routes is estimated to be approximately 15 million gallons with a corresponding value in 2007 of 29 million dollars. ALAM was further developed to optimize multiple trains simultaneously if advance information about outgoing trains and loads is available. In chapter 4, I present static and dynamic aerodynamic efficiency models for the loading of multiple intermodal trains with a rolling horizon scheme for continuous train terminal operations. Numerical results show that the realistic rolling horizon scheme significantly reduces the adjusted gap length as compared to the current practice, which leads to a substantial benefit from aerodynamic efficiency of intermodal trains. In chapter 5, I develop a new decision support framework to help capacity planners determine how to optimize the allocation of capital investment for capacity expansion projects. This framework has three stand-alone tools: (1) an "Alternatives Generator" that enumerates possible expansion options along with their cost and capacity effects; (2) an "Investment Selection Model" that determines which portions of the network (at the subdivision level) need to be upgraded with what kind of capacity improvement options; and (3) an "Impact Analysis Module" that evaluates the tradeoff between capital investment and delay cost. Based on network characteristics, estimated future demand, and available budget, the proposed decision support framework can successfully determine the optimal solution regarding which subdivisions need to be upgraded and what kind of engineering options should be conducted. |
| Puenpatom, Tosmai | Three essays on demand for freight transportation: Optimization, spatial econometrics and parametric estimations | Washington State University | 2006 | AAT 3252317 | The dissertation evaluates the demand for grain transportation using different methodologies such as a spatial Tobit demand estimation and the optimization models. The first essay, taking account of the spatial interactions, develops the Tobit demand system with different spatial weight matrices, which represents spatial effects on demand for transportation among neighboring elevators. I proposed the new methodology of systematically constructing an *unequal* weight matrix for the spatial Tobit demand model through the use of Geographic Information System (GIS). The main results indicate a significant negative impact of the spatial factor in the demand for rail transportation and heterogeneity among elevator companies. The second essay examines the effects of Identity Preserved (IP) system on grain transportation in Washington by applying General Algebraic Modeling System (GAMS). I develop linear programming optimization models representing three scenarios, which are the current bulk grain transportation, the IP or containerized grain transportation and the IP system including extra material costs. The results indicate a significant change in wheat flows as a result of the IP system. The third study evaluates impacts of the Pacific Northwest (PNW)'s soft white wheat (SWW) marketing plan which aims to promote wheat to buyers by providing information of the different end-use qualities of the soft white wheat grown in different geographical areas. The cost-minimizing linear programming optimization model is applied to represent elevator managers' decision on grain transportation. The results indicate insignificant changes in wheat flows and a slightly increase in transport costs due to the imposition of the marketing plan. In contrast to the IP system, the zoning policy is significantly inexpensive as the result of the existing economies of scale. |
| Suteewong, Worawan | Algorithms for solving the train dispatching problem for general networks | University of Southern California | 2006 | AAT 3236555 | Recently, the research community has focused on the problem of efficient movement of freight by rail since there has been a tremendous increase in worldwide container trade. For example, there is an estimation that the Ports of Los Angeles and Long Beach (San Pedro Bay Ports), which are one of the busiest ports in North America, will double their current cargo by year 2020. This raises the demand for freight trains and leads to congestion in rail operation. Several train studies in the past focused on solving the train scheduling problem by simplifying and omitting many realistic characteristics such as trackage configurations or speed restrictions. However, we incorporate these characteristics into our models so we can obtain a solution that can be easily applied to actual railway operations more efficiently. These characteristics include multiple trackage configurations, multiple train types, multiple train lengths, multiple speed limit restrictions, and incorporation of acceleration and deceleration rates. The purpose of this research is to optimize the train travel time for general rail networks. We formulate a nonlinear integer mathematical model with an objective function to minimize the travel time. |
| Xu, Jiang | Economic analysis of railway freight transportation in China | Momoyama Gakuin University, Japan | 2006 | AAT 3221039 | Recently, high rapid economic growth in China has contributed to the expansion of freight transportation. In this paper, the author investigates how rail freight transportation volume relates to regional economics, development of traffic infrastructure, and location of industries in each province. The analysis employs to panel data all provinces and special cities from 1985 till 2002. The author elucidates the factors affecting dispatching and arriving volume of rail freight and constructs gravity and fixed-effects models explaining railway freight transportation in each province. |

Code 6: Water Transportation

| **Author** | **Title** | **Institution** | **Year** | **Number** | **Abstract** |
| --- | --- | --- | --- | --- | --- |
| Agarwal, Richa | Network design and alliance formation for liner shipping | Georgia Institute of Technology | 2007 | AAT 3271467 | In this thesis, we focus on problems related to the liner shipping industry. Given a set of cargo to be transported, a set of ports and a set of ships, a common problem faced by carriers in liner shipping is the design of their service network. We develop an integrated model to design service network for the ships and to route the available cargo, simultaneously. Also, we design exact and heuristic algorithms to solve the integer program efficiently. Computational experiments indicate that larger problem instances, as compared to the literature, can be solved using these algorithms in acceptable computational time. Additionally we provide a quantitative study of alliance formation. For the formation of a sustainable alliance, carriers need to agree on an overall service network and resolve issues concerning distribution of benefits and costs among the members of the alliance. We develop mechanisms to design a collaborative service network and to manage the interaction among the carriers through the allocation of profits in a fair way. The mechanism utilizes inverse optimization techniques to obtain resource exchange costs in the network. |
| Denisis, Athanasios | An economic feasibility study of short sea shipping including the estimation of externalities with fuzzy logic | University of Michigan | 2009 | AAT 3354137 | This dissertation examines the economic feasibility of short sea shipping (SSS). The environmental and societal advantages of SSS over competing modes are translated into lower external costs. External costs or externalities are the hidden costs not reflected in transportation prices. This non-inclusion is considered a market failure by economists. Estimating their monetary value is a challenging task. There is an inherent subjectivity, imprecision, and vagueness in current external cost valuation methods. This dissertation addresses this vagueness and imprecision of externalities using fuzzy logic. The results show that SSS has great potential for further improving its environmental performance by lowering ship emissions at ports, where most of its external costs occur, by implementing procedures, such as “cold ironing.” The dissertation assesses the feasibility and competitiveness of SSS, in comparison to the all-truck mode, in two realistic cases of prospective short sea operations along the U.S. East Coast. Combining the internal costs with the external cost estimates, the two case studies demonstrate the fair pricing principle in freight transportation, where prices are based on the full social cost of a transportation mode. |
| He, Yi | Topics in contract pricing and spot markets | Georgia Institute of Technology | 2008 | AAT 3327587 | This thesis studies two related topics in liner shipping. The first topic is the contract pricing problem for container carriers. The second part studies the interaction of the longer term contracts and the spot markets/exchanges for the same goods/services. We propose three optimization models as decision tools that carriers can use to plan the contract price structures, as well as the anticipated freight flows and empty container flows for the period covered by the contracts. Based on the models, we propose algorithms and build decision tools that generate the following output: optimal prices to be charged for the movement of freight, the anticipated freight flows and empty flows, containers to be leased, rented and purchased, and the additional voyage capacities to be procured. In addition, a three-stage stochastic model is proposed to handle uncertainties in demand rates, costs, bookings and transit times on feeder arcs. The second part of the thesis studies models to provide insight into the effect of spot market participation rates on various economic quantities. We investigate the effects of spot market participation on the contract market and on the surpluses of all market players. It is found that the contract market shrinks as more and more buyers participate in the spot market. However, the effects on the surpluses of different market players are much more complicated and depend on the following factors: market structure, demand variation along time, demand variation among buyers and capacity level. |
| Kuska, Gerhard F. | Collaboration toward a more integrated national ocean policy: Assessment of several United States federal interagency coordination groups | University of Delaware | 2006 | AAT 3200549 | This study assesses four federal interagency coordination groups in the U.S. ocean policy arena to examine the factors that facilitate and hinder interagency collaboration, with the aim of developing policy guidance for achieving effective collaboration across the range of federal agencies involved in ocean policymaking and implementation. thirty-six semi-structured interviews were conducted with current and former members of the four federal interagency coordination groups to determine what the groups were established to do, what they accomplished, and what factors promoted and hindered collaboration among the agency members in the groups. The groups were: the National Ocean Research Leadership Council (NORLC); the Interagency Committee on the Marine Transportation System (ICMTS); the Subcommittee on Oceans Policy of the Global Environment Policy Coordinating Committee (Oceans Sub-PCC); and the National Dredging Team (NDT). The study identified seventy factors that promote collaboration and ninety-two factors that hinder it, which represent a mix of structural factors, which describe organizational characteristics, non-structural factors, which describe characteristics of organizational interactions and group member behavior, and some external/political factors , which describe influences on organizations from outside the groups and their memberships. In addition, the study developed a Continuum of Collaboration to provide a framework for categorizing concepts defined in the literature on interorganizational collaboration, including communication, cooperation, coordination, harmonization, and integration. |
| Saldanha, John Patrick | Choosing the right information coordinating mechanism for the international ocean shipping process | The Pennsylvania State University | 2006 | AAT 3334020 | The objective of this study is to investigate the current nature of utilization and potential value of the Internet portal, Electronic Data Interchange, and, phone, fax and e-mail for conducting the international shipment of freight containers by ocean liners. The theoretical basis for the model used to answer the research questions utilizes a contingency approach, which assumes that only a certain level of a solution is appropriate for a specific level of a problem. The rationale of the model is that firms increase their information processing capabilities, by using EDI or Internet portals, in response to increasing information processing needs, arising from higher uncertainty. It was expected that firms who displayed such a fit would perform better than firms who did not. The data analysis revealed the existence of four differently configured gestalts of shippers. As expected, the gestalts that configured their information processing capabilities according to their information processing requirements performed the best. It was observed that large shippers with a large number of containers shipped and a higher value of shipments along with stable demand and supply, and routine uncomplicated tasks benefited from the long lead times of ocean shipping. They could use low information processing capabilities to manage their shipping process. However, when the number of overseas suppliers increased higher information processing requirements were required to maintain high performance. On the other hand, shippers who face unstable demand and supply, and experience several operational disruptions, and exceptions need to increase their information processing capability to improve performance. The long lead times of international ocean shipping, appear to impair such shippers' ability to respond to changes in demand and supply or, exceptions. |
| Somanathan, Saran | Feasibility study of a commercial shipping route through the Canadian Arctic | University of Alberta (Canada) | 2005 | AAT MR08151 | This present study uses simulation techniques to verify the feasibility of a commercial shipping venture if global warming resulted in the thawing of Arctic seas. A general purpose simulation language, VSLAM was used to check the trafficability. The economic performance was evaluated by estimating the required freight rate. For this purpose, a stochastic cost model was constructed, and a spreadsheet simulation experiment was conducted. Based on the required freight rate, it was found that the venture would be viable in the Asia-to-Canada trade route, even at an incremental capital requirement of 50%. The sensitivity of the "required freight rate" to various inputs was checked, and was found to be most sensitive to capital cost followed by, power demand in ice. |
| Tomkins, Claire Danielle | Allocation and pricing of water resources | Stanford University | 2009 | AAT 3332940 | This thesis addresses two questions central to the water intermediary’s management objective, both related to pricing. The first question is that of an optimal pricing policy in the presence of storage and both demand and supply uncertainty. The second pricing model developed in this thesis treats option contracting in the water market. We price the water option contract from the seller’s perspective and from a social planner's perspective. We then investigate the sensitivity of the contract prices and quantity to shifts in a number of contract parameters, including the presence of an outside option for the buyer and possible access to a spot market for water. Finally, we investigate changes to the contract prices and quantity in the presence of multiple buyers and sellers, where the latter requires consideration of strategic interactions between sellers. |
| Uluscu Tutun, Ozgecan S. | Performance modeling and risk analysis of transit vessel traffic in the Istanbul Strait: Studies on queues with multiple types of interruptions | Rutgers The State University of New Jersey - New Brunswick | 2008 | AAT 3359218 | In this research, we have developed a mathematical risk analysis model to analyze the risks involved in the transit vessel traffic system in the Istanbul Strait. In the first step of the risk analysis, the transit vessel traffic system is analyzed and a simulation model is developed to mimic and study the system behavior. In addition to vessel traffic and geographical conditions, the current vessel scheduling practices are modeled using a scheduling algorithm. Furthermore, a scenario analysis is performed to evaluate the impact of several parameters on the system performance. Risk analysis is performed by incorporating a probabilistic accident risk model into the simulation model. A mathematical model is developed based on probabilistic arguments and historical data and subject matter expert opinions. We have also performed a scenario analysis to evaluate the characteristics of the accident risk. This analysis allows us to investigate how various factors impact risk. These factors include vessel arrivals, scheduling policies, pilotage, overtaking, and local traffic density. Policy indications are made based on results. Finally, We have developed queuing models subject to various operation-independent interruptions. We have used waiting time arguments and service completion time analysis to approximate the expected waiting time of a vessel in the aforementioned queue for various cases of service interruptions. |
| Vanelslander, Thierry | The economics behind co-operation and competition in sea-port container handling | niversiteit Antwerpen (Belgium) | 2005 | AAT 3220057 | This thesis tries to assess the benefits from mergers and acquisitions in particular. It is shown to what extent economies of scale occur, how these depend on container-handling conditions, and how mergers and acquisitions in particular may generate economies of scale in container-handling. The existence of terminal economies of scale is demonstrated qualitatively as well as quantitatively. Economies from terminal scale are observed for all the different settings considered, they are in some cases substantial and they are mainly due to labor and maintenance. 89 influencing factors, ranked as policy, scope, chain terminal-specific of container handling supply and demand conditions are identified. The main results of the quantitative testing are that economies are increasing in terminal capacity and crane sized, decreasing in labor flexibility, and in line under new versus old equipment scenarios. Specific to mergers and acquisitions, effects on container handling conditions and economies at container terminals may be threefold: there may be economic, financial or market effects. Although the focus in the thesis is on merger and acquisition decisions, it is shown that other company decisions like the type of competition, network building, differentiation, diversification and integration impact on specific merger and acquisition effects. It is for instance noted that more limited companies are started up abroad than domestically. It is also observed that, except for the major operators PSA and Eurogate, all operators have started up more limited companies in the cargo-handling business than in non-cargo-handling businesses. The logistics sector is most often a target sector. Different strategies are however applied by the major container-handling operators. APM Terminals, Eurogate and DPA have started up more companies non-co-operatively than co-operatively. HPH and PSA have quite often teamed up with shipping companies in their terminal ventures. A final conclusion of the thesis, of relevance to eventual use of the results obtained in model and/or game setting, relates to the fact that oligopolies prevail. |
| Veldhuis, Ivo Jurgen Simon | Application of hydrogen marine systems in high-speed sea container transport | University of Southampton (United Kingdom) | 2007 | AAT C828850 | This research considers the fuel weight barrier in high-speed ship design and the use of hydrogen as a marine fuel to overcome this barrier. Simultaneously, it is now accepted that environmental pollution from ships, particularly large containerships, contributes to climate change. Hydrogen marine utilization provides a solution for both. As common to other hydrogen research the fuel system spans production to utilization. This hydrogen marine system utilizes an established production method to obtain hydrogen from natural gas through steam methane reformation. To achieve an acceptable storage volume meeting the typical high-speed ship dimensions the hydrogen also requires liquefaction. The hydrogen is then converted onboard into shaft power via combustion in aero-derivative gas turbines. This research establishes the necessary system components spanning both onshore and ship components. The novelty of the research has resulted in new design tools. Research into large hydrogen transport applications is not new and a substantial body of research is available from passenger aviation studies performed during the 1980s and 1990s. Additionally, a more current body of research is available describing hydrogen utilization in large gas turbines for energy and oil/gas industries. This combined research provides the characteristics of the onboard hydrogen system of a high-speed foil-assisted containership. This ship is capable of transporting 600 industry standard 20' containers on long-haul ocean routes, i.e. 5000 nautical miles, at a speed of 64 knots (118.5 km/hr). Such ship performance is not feasible with conventional marine fuels. The design is complex involving a combination of buoyancy and dynamic lift and two distinct operational modes at floating and dynamic draughts. Research involving this ship configuration is included here in conjunction with suitable design methodologies. Besides technical feasibility, economic feasibility of this containership has also been investigated based around the unit transport price required to recoup costs and achieve zero net present value. Such analysis identified that the containership has higher minimum freight rates than conventional containerships but substantially lower rates than aviation cargo. Due to its high-speed and improved endurance it can compete with aviation on transport time and price. Economic review also identified that shorter container door-to-door times are now demanded by the consumer production industry and this hydrogen marine container transport system meets this demand. |
| Yang, Kang-Hung. | A hybrid approach for container terminal operations | The University of Oklahoma | 2008 | AAT 3336827 | This study aims to analyze different operational problems in container terminals to provide effective and efficient policies for on-site operations. The three main topics in this study are the berth allocation problem (BAP), the quay crane scheduling problem (QCSP), and the inspection problem. Instead of analyzing these problems separately, I study the combined problems. The first study addresses BAP and the inspection problem, the second study addresses QCSP, and the third study addresses the combined problem of BAP and QCSP. The first study estimates a reasonable service rate for the inspection operation, so that the inspection will not be the bottleneck of the system. The second study addresses QCSP. I consider the problem that has one vessel and multiple cranes. Exact and heuristic solution approaches are developed for the problem. A mathematical model with a time-space network flow sub-structure and non-crossing constraints is established for small size problems. The third study focuses on a general problem that combines BAP and QCSP, named BAQCP. I develop a mathematical formulation and use a heuristic approach to solve BAQCP. Two heuristics, preemption and non-preemption, are developed. Both theoretical and numerical results demonstrate the efficiency and effectiveness of these two heuristics. In order to further improve the heuristic results, I combine the exact solution approach provided by the mathematical formulation and the heuristic approach. The heuristic solutions are set to be the initial inputs for the mathematical model. Numerical experiments show that this combined approach makes the improvement of the solution quality within a reasonable execution time, and that they can be applied for practical cases in the real world. |
| Yu, Tun-Hsiang | Essays on the Upper Mississippi River and Illinois Waterway and United States grain market | Texas A&M University | 2005 | AAT 3172088 | This dissertation examines several issues regarding the congestion on the Upper Mississippi River and Illinois Waterway. Chapter II identifies and measures the impact of lock congestion on grain barge rates on these waterways. Results indicate grain barge rates on both rivers are not affected by lagged lock congestion. Chapter III explores the interaction between grain prices in export and domestic markets and transportation rates linking these markets over time. Three model frameworks were evaluated and some consistent results are observed. In general, shocks in transportation rates (barge, rail, and ocean) explain a great proportion of the variation in corn and soybean market prices in the long run, suggesting the importance of transportation in grain price determination. Chapter IV estimates the structural demand for grain barge transportation on both the upper Mississippi and Illinois Rivers. Results suggest foreign grain demand is the most influential force affecting grain barge demand on both rivers. Also, results indicate an inelastic demand for grain barge transportation on the Upper Mississippi in the short run, demand is price elastic in the long run. The price elasticity for grain barge demand on the Illinois River is consistently inelastic. Additionally, the winter season and floods affect demand on the Upper Mississippi negatively, while barge demand increases on the Illinois River in winter. |

Code 7: Air Transportation

| **Author** | **Title** | **Institution** | **Year** | **Number** | **Abstract** |
| --- | --- | --- | --- | --- | --- |
| Amaruchkul, Kannapha | Models for air-cargo allotment management and booking control | University of Minnesota | 2007 | AAT 3292936 | Air carriers sell cargo capacity either as an allotment or on an ad-hoc basis. An allotment is a pre-negotiated amount of capacity on specific flights that is reserved for forwarders through medium-term contracts. In contrast, the carrier makes no prior commitment to accept ad-hoc shipments. This dissertation develops mathematical models to analyze the allotment-contract mechanism design problem and the ad-hoc booking control problem. We study capacity contracts between carriers and forwarders when certain parameters such as the forwarder's demand, freight charges, and operating costs are its private information. We propose contracts with three parameters: a per-flight allotment, a lump-sum payment for the season, and a per-flight payment that depends on the volume tendered by the forwarder. We identify conditions under which relatively simple payment schemes can eliminate informational rents. We also study how the carrier's profit might be affected when the forwarder may not set its booking limit equal to the allotment. We consider the cargo-booking control problem on a single-leg flight with the goal of maximizing expected contribution. Each piece of cargo is endowed with a random volume and a random weight whose precise values are not known until just before the flight is set to depart. We formulate the problem as a Markov decision process (MDP). Because of its high-dimensional state space, an exact solution is not possible. Therefore, we develop six heuristics. The first four are based on different value-function approximations derived from one-dimensional MDPs. The remaining two heuristics are obtained from solving related mathematical-programming |
| Amiel, Magali | Operateur-reseau et approche relationnelle: L'industrie du fret aerien au Canada | Universite de Montreal, Canada | 2008 | AAT NR57516 | The aim of the thesis is to adopt an approach based on the concept of network operators involving an analysis of the relationships between the three actors of air cargo namely, the airport terminal operators, air carriers and the logistic community. Three research questions have been identified and applied to the air cargo industry in Canada: (1) An issue on how institutional stakeholders of the airline industry govern the freight transport; (2) An organizational issue to determine how the air cargo industry meets the requirements of market economy; (3) An issue to determine how operational conditions affect local responses and actions of players in their system of air cargo delivery. The research methodology consists in analyzing each of the players in the air cargo industry in Vancouver, Montreal and Toronto in terms of investment, network performance and products carried. The synthesis of this analysis assesses the structure and gives a portrait of the air cargo industry in Canada. |
| Granger, Julien | Performance improvement of queuing networks with synchronization stations | The University of Wisconsin – Madison | 2006 | AAT 3234614 | This research concerns the performance improvement of queuing networks with synchronization stations. The first part of our research concerns the performance improvement of airfield operations, which represent the steps aircraft need to undergo at an airfield in air logistics systems. We use synchronization stations to model a mechanism for air traffic control, as well as a mechanism for designing operations concurrently instead of sequentially. The second part of our research concerns kanban-controlled serial production lines. We assume that there is a finite supply of raw material and a finite supply of demand in finished goods. The line can be organized into cells, and we model cells with synchronization stations. We then propose two algorithms to solve the optimal card allocation problem. The first algorithm is a heuristic based on simulation. It provides an optimal answer when tested against exhaustive simulation, but it is computationally expensive. The second algorithm is a heuristic built in two steps. In the first step, the optimal card allocation problem is formulated as a mixed integer nonlinear programming problem (MINLP) with the analytical model obtained via parametric decomposition. In the second step, a simulation-based search is performed in the neighborhood of the MINLP solution. In the third part of our research, we characterize exactly a synchronization station fed by three independent Poisson processes with shut-down levels via a Markov renewal approach. We compare this system with an alternative system comprising two synchronization stations, each with two buffers, organized in a cascading fashion. We show that those two systems are not equivalent. We provide guidelines for arranging the three input processes so that the cascading system represents most accurately the original system. |
| Ishutkina, Mariya A. | Analysis of the interaction between air transportation and economic activity: A worldwide perspective | Massachusetts Institute of Technology | 2009 | AAT 0821976 | Air transportation usage and economic activity are interdependent The objective of this work is to contribute to the understanding of the relationship between air transportation and economic activity. More specifically, this work seeks to (1) develop a feedback model to describe the relationship between air transportation and economic activity and (2) identify factors which stimulate or suppress air transportation development. To achieve these objectives this work uses an exploratory research method which combines literature review, aggregate data and case study analyses. First, this work uses data at the individual country level to identify different types of growth patterns between air transportation passengers and GDP for 139 countries. This analysis is then used to identify twenty-two representative countries which span a range of possible interaction behaviors, geographies and income categories. The case study analysis at the individual country level is performed to describe the air transportation impact for each individual economy. Specifically, the analysis is used to describe (1) how air transportation flows of passengers and cargo enable the flows of goods, services, knowledge, tourism, investment, remittances and labor among economies and (2) how air transportation flows can affect the country's factor, demand and business conditions. The air transportation demand is found to be directly affected by exogenous demand shocks, economic downturns, political and economic sanctions, and the development of other transportation modes. The analysis also identifies the following change factors which affect the demand indirectly by changing the country's economic attributes: economic liberalization, institutional and political reforms, supporting infrastructure investment, exchange rate fluctuations, political and macroeconomic stability, growing consumer demand, and changes in management practices. This analysis of stimulating and suppressing factors helps to describe the role of government intervention in changing air transportation system development and its impact on economic activity |
| Kahraman, Aykut F. | Analysis of a quality-of-service measure in a bulk-arrival, bulk-service queue: Structural results and applications in air-cargo delivery systems | State University of New York at Buffalo | 2006 | AAT 3226583 | This work focuses on the development of Markov-chain models for the analysis of bulk-arrival, bulk-service queues operating under the assumption of homogeneous and non-homogenous Poisson arrivals. The theory developed here is geared towards measuring the number stranded in bulk-arrival, bulk-service queues. The number stranded is directly related to the Quality of Service (QoS) of the server in the queuing system. Examples of such queues, commonly formed in the real world, are: transportation systems with (non-unit load) automated guided vehicles in production factories and people-movers in amusement parks. The analysis in this dissertation takes into consideration various dispatching and stranding strategies encountered in the real world. Theoretical analysis is supplemented with a case study from technology management. In particular, the case study is related to a problem in strategic capacity management of dedicated air-cargo-delivery systems. This problem needs to be analyzed under a variety of dispatching and “stranding strategies,” since these strategies vary across organizations and across cities within the same organization. Finally, extensive computational tests are performed to demonstrate the efficacy of these models. |
| Moussawi, Lama | Demand and supply matching with applications in air cargo and retail industries | The University of Texas at Dallas | 2006 | AAT 3238598 | In a world of uncertainty, matching customer demand and supply is among the most important managerial decisions and deserves careful analysis. In this dissertation, we study three different problems under the context of matching the demand and the supply. In the first two problems, the supply is fixed. This is encountered in the airline industry, where the capacity of an aircraft is fixed and the objective is to maximize profits by matching the incoming demand and the capacity. This is known as revenue management, which is concerned with making efficient use of a given resource that becomes worthless after a certain time. Among the main decisions in this area are choosing the overbooking limits beyond which any booking request is rejected and pricing the fixed capacity. Such decisions are very complex for cargo airlines because cargo capacity is two-dimensional: volume and weight. The first two chapters address, respectively, the following problems: Choosing the optimal overbooking limits and pricing a two-dimensional capacity. On the other hand, in the face of uncertain demand, the supply-related decisions encountered in the retail industry affect inventories, which in turn greatly impact profits. Inventory in the retail industry changes with respect to such decisions as to when and how much to order from a supplier. Chapter 4 addresses a problem faced by a retailer who tries to meet demand to the best possible extent from the available inventory. Specifically, the retailer's decision is to choose at any time the size of an order so that the total cost is minimized. |
| Palk, Delcy M. | Differences in airport operational efficiencies and environmental impact: An examination of United States large and medium hub commercial airports | Capella University, Minnesota | 2007 | AAT 3288817 | U.S. large and medium hub airports were evaluated to determine causes of operational efficiency differences, and whether accounting for undesirable environmental impact may create efficiency differences. Secondary data were examined in this study. The data envelopment analysis (DEA) undesirable outputs model was used for investigating operational efficiencies. Input variables included airport acreage, maximum weight bearing capability of airfield, number of runway orientations, number of parallel runways, number of intersections leading off runway, number of high-speed taxiway exits, and number of ILS approaches. Output variables included totals for calendar years 2003-2006 for cargo (in pounds), passenger, and mail (in pounds) movement (origination and departures). Undesirable output used heavy and stage III retrofit aircraft operations as a proxy for environmental impact associated with noise. It was found that large hubs have higher operating efficiencies than medium hubs, and that medium hubs are negatively impacted by annual snowfall levels of 7.5" or more. From the examined inputs and outputs measurements of this study, it appears that airports with more acreage/real property show more efficiency in moving passengers, cargo, and mail. |
| Popescu, Andreea | Air cargo revenue and capacity management | Georgia Institute of Technology | 2006 | AAT 3248756 | The air cargo industry has substantially grown over the past few years, driving the need of a structured environment with the explicit goal of maximizing revenues. The air cargo supply chain is composed of shippers, freight forwarders, and airlines. The shippers send their shipment to freight forwarders, who are responsible for contacting the airlines and procuring space to ship the cargo according to the shippers' needs. Currently, the process takes more time than needed due to a lack of coordination between freight forwarders and airlines; it is said that an integrator, a freight forwarder which owns its own fleet, moves an international shipment two or three times faster than a traditional freight forwarder/airline team [10]. The scope of this thesis is to propose a structured methodology for improving the airlines' and freight forwarders' actions when confronted with accepting demand and acquiring capacity respectively. We develop methods to tackle two air cargo revenue management problems: space allocation and show-up rate estimation. Besides the airline's revenue management problems, we solve the capacity management problem for the freight forwarder. The freight forwarder bids for cargo space on flights offered by the airlines several months before the actual departure date of the aircraft. The committed capacity has to be confirmed a few days before the departure date. In spite of its importance, there are no known solutions to this problem. We propose modeling the problem as a perishable inventory problem with backlog and lead time. We propose a stochastic dynamic programming model to illustrate the freight forwarders' problem and show that the value function is a convex function in the state variable, which is either available capacity for the current period if it is positive or backlog if it is negative, for a lead time of one and two periods. |
| Serfaty de Medeiros, Karine Paule Julie | Essays in international and financial economics | Harvard University, Massachusetts | 2008 | AAT 3334791 | This dissertation is a collection of three chapters. The first chapter presents a model of trade with heterogeneous firms under demand uncertainty along with empirical tests of its predictions. The model shows that firms facing higher demand unpredictability have more incentives to choose air transportation over sea transportation. Indeed, by reducing the lag between the production decision and final delivery, air transportation enables firms to better forecast demand levels, hence increasing their expected profits despite the higher cost. At the sector level, the model shows that unpredictability predicts the prevalence of air transportation, which in turn determines the distance elasticity of trade flows. There is strong evidence that corroborates the predictions of the model. We build a measure of demand unpredictability based on the model and provide empirical evidence showing that the factors we highlight do explain over 60% of the variation in distance elasticity across sectors. |
| Shifman, Sandra Lynnette | Inside the quality practice: Perceived benefits of achieving ISO certification in the air freight industry | Northcentral University, Arizona | 2005 | AAT 3175085 | This dissertation studied the perceptions of 112 managers of large air freight companies concerning the International Organization for Standardization (ISO). The study concentrated on the responses of managers representing ISO certified companies making efforts to improve performance, profits, quality, and competitiveness by implementing ISO and questioned the relationship between successfully achieving ISO certification and the four major company goals of improving the quality and reliability of the systems, providing customer service and satisfaction, identifying the costs of implementing a quality program, and improving on time performance. The researcher proposed an implementation road map describing the processes necessary to achieve ISO accreditation. The most important finding of this research was the importance of ISO for companies working with clients outside of the United States. Internationally, ISO certification contributed to an air freight company's increasing clients, profits, and markets. In order to remain competitive, air freight companies developed formal quality improvement programs such as ISO and have used a variety of transportation quality practices to satisfy customers and to improve their performance and profits. |
| Sim, Thaddeus Kim Teck | The hub covering flow problem and the stochastic p-hub center problem | The University of Iowa | 2007 | AAT 3290688 | The hub location problem seeks to find the best location for hubs and the assignment of non-hub nodes to hubs. The resulting structure is a hub-and-spoke network. In this dissertation, we study the hub location problem within the context of three different application areas. We first consider the air travel industry, where many airline companies (especially the legacy airlines) operate hub-and-spoke networks. Important considerations in designing such a hub-and-spoke network are the cost of establishing the hubs, the cost of transporting passengers through the network, and the operating costs and maximum flying ranges of the different aircraft types in the fleet. We introduce the hub covering flow problem, which accounts for all these design considerations. We next look at time-definite delivery services in the small package delivery industry, where a customer's package is guaranteed to be delivered within a certain time-window. With possible delays along the transportation route, a package may not be delivered on time. We introduce the stochastic p -hub center problem, which seeks to design a network where the longest origin-destination path in the network is minimized. The solution provides an upper bound on the delivery times, which can be used to design time-constrained service offerings, or to ascertain if current service guarantees are feasible. A service-level constraint is included into the model to ensure a high likelihood of on-time delivery. |
| Wong,  Wai Hung | Three studies in air cargo logistics | The Chinese University of Hong Kong  (Hong Kong) | 2008 | AAT 3362963 | Three studies in air cargo logistics are conducted respectively, covering the following three areas: carrier's passenger and cargo management, logistics service provider's partnership strategy, and an airfreight forwarders resource planning. In the first study, we formulate the passenger and cargo allocation problem as a variant of the price-dependent multi-item newsvendor model with capacity constraints. The effects of baggage weight, pricing, and costing on the number of passengers and amount of cargo carried are studied. Based on the model and the existing practice of carriers, we develop several illustrative cases and fend that to maximize profit, large aircraft may need to reduce their baggage limits significantly from the current policy. In the second study, we propose the dynamic partnership concept, which assures a feasible partnership in an online logistics community. After identifying the platform requirements, a preliminary knowledge framework which describes the collaborative knowledge and new knowledge managing approaches is suggested. In the third study, we provide a two-phase framework for an airfreight forwarder’s resource planning. In each timed phase, an optimization model first determines the aggregates and a simulation model then examines the disaggregated situations evaluating whether the aggregate estimates are viable under disaggregation and uncertainties. Here, a set of measurements are established to evaluate the performance of a resource plan. For the inadequate plans, areas of possible improvements are identified for revision. |
| Yankov, Daniel Y. | Discrete event system modeling of demand responsive transportation systems operating in real time | University of South Florida | 2008 | AAT 3326108 | Demand responsive transportation is a variable route service of passengers or freight from specific origin(s) to destination(s) in response to the request of users. In this study, DRT systems are modeled as Discrete Event Systems using Finite Automata formalism and DRT real time control is addressed using Supervisory Control Theory. Two application scenarios are considered; the first is based on air-charter service and illustrates uncontrolled system model and operational specification synthesis. The automatic synthesis of centralized and modular supervisors is demonstrated. The second scenario is a mission critical application based on emergency evacuation problem. Decentralized supervisory control architecture suitable for accommodating the real-time contingencies is presented. The modeling and control approaches described herein, coupled with the mature body of research literature in Discrete Event Systems and Supervisory Control Theory, facilitate logical analysis of these complex systems and provide the necessary framework for development of intelligent decision making tools for real time operational planning and control in a broad range of DRT applications. |

Code 8: Pipeline Transportation

| **Author** | **Title** | **Institution** | **Year** | **Number** | **Abstract** |
| --- | --- | --- | --- | --- | --- |
| Thompson, Jennifer Ruth | Misunderstood markets: The case of California gasoline | University of California at Davis | 2008 | AAT 3317977 | Spatial price spreads of wholesale gasoline within the state exhibit some characteristics that seem, on the surface, inconsistent with spatial price theory. Proprietary data, consisting of daily product prices for the years 2000 through 2002, disaggregated by company, product, grade, and location is used to examine more closely spatial price patterns. My discussion of institutional and physical infrastructure outlines two features of the industry that limit, but do not prohibit, arbitrage. First, a look into branding and wholesale contracting shows that contract terms, specifically branding agreements, reduces the price-responsiveness of would-be arbitrageurs. Second, review of maps and documents illustrating the layout of physical infrastructure, namely petroleum pipelines, confirms the existence of some connections among markets. My analysis of the day-of-the-week effects on wholesale prices demonstrates how the logistics of the use of transportation infrastructure affect market prices. Further examination of spatial price relationships shows that diesel prices follow closely the Augmented Law of One Price (ALOP), and that branding agreements cause gasoline prices to deviate substantially ALOP. Without branding, the gasoline prices follow as closely as diesel prices to ALOP. Finally, system-wide causality analysis finds linkages among markets. In summary, both physical and statistical linkages exist among the study markets. Arbitrage among these markets is limited by the logistics of transportation infrastructure and by branding agreements in wholesale contracting. |
| Thyagarajan, Karthik | Modeling distribution issues in the industrial gas business | State University of New York at Buffalo | 2007 | AAT 3277775 | This dissertation addresses some of the issues arising from the distribution of industrial gas. In the industrial gas business, the concept of vendor managed inventory (VMI) is practiced. But, the VMI concept comes with its own problems that become difficult to solve when there are multiple supply points (vendors) and a large customer base for each vendor. The first part of this dissertation investigates the above-mentioned problem with the goal of making the solution fast and implementable. The second part of the dissertation considers the problem of reallocating trailers (trucks) between plants such that certain performance indicators like volume per trip, volume per mile, and average product returned are optimized over a time horizon. The third and final part of the dissertation deals with refining the calculation of previously developed metric using concepts that include cooperative game theory. |
| Wang, Mulan Xiaofeng | Supply chain management and economic valuation of real options in the natural gas and liquefied natural gas industry | Carnegie Mellon University | 2008 | AAT 3319746 | My dissertation concentrates on several aspects of supply chain management and economic valuation of real options in the natural gas and liquefied natural gas (LNG) industry, including gas pipeline transportations, ocean LNG shipping logistics, and downstream storage. Chapter 1 briefly introduces the natural gas and LNG industries, and the topics studied in this thesis. Chapter 2 studies how to value U.S. natural gas pipeline network transport contracts as real options. Chapter 3 studies the operations of LNG supply chains facing both supply and price risk. To model the supply uncertainty, we employ a closed-queuing-network (CQN) model to represent upstream LNG production and shipping, via special oceans-going tankers, to a downstream re-gasification facility in the U.S, which sells natural gas into the wholesale spot market. Chapter 4 studies the importance of modeling the shipping variability when valuing and managing a downstream LNG storage facility. Chapter 5 summarizes the contributions of this thesis. |
| Wongsiriroj, Rapeeporn | Investigation of market power in natural gas system | Purdue University | 2007 | AAT 3287233 | The proposed equilibrium model used to examine the opportunity for the firms to exercise market power is characterized by a game-theoretic framework problem with Cournot behavior assumed. It takes into account the system uncertainty that is formulated as a two-stage problem, which employs the recourse method. Market power can be exercised in the downstream gas markets if firms, who face a downward sloping demand curve, attempt to increase prices above the competitive levels, leading to lower outputs supplied to the market. The problem is firms overreserve capacity. The base case with a sample network and calibrated data is used to validate the model. The results show that the firm who is capable of exercising market power in the gas sale markets, benefits from an exclusive accessibility to the reservation markets and then places the competitor who does not have market accessibility into a disadvantageous position. Therefore, the restricted market access leads to higher profits for the firm with market accessibility and lower profits for the competitor who cannot enter the reservation markets. However, the restricted market access does not have a significant impact on both customers and competing firms as long as the firms are governed by effective regulation. Sensitivity analysis is also performed on various sets of selective, critical parameters to determine the impact of different sources of variation on the extent of market power and social welfare. |

Code 9: Miscellaneous Transportation

| **Author** | **Title** | **Institution** | **Year** | **Number** | **Abstract** |
| --- | --- | --- | --- | --- | --- |
| Agrahari, Homarjun | Models and solution approaches for intermodal and less-than-truckload network design with load consolidations | Texas A&M University | 2007 | AAT 3296303 | In this dissertation, we investigate the development of models and solution algorithms for problems in the areas of LTL and intermodal transportation as well as in the freight forwarders industry. We develop models and solution methods to address strategic, tactical and operational level decision issues and show computational results. This research provides new insights into these application areas and new solution methods therein. The solution algorithms developed here also contribute to the general area of discrete optimization, particularly for problems with similar characteristics. |
| Agrawal, Bhuwan Bhaskar | An analytical shipper-carrier dynamic freight assignment model using a variational inequality approach | Northwestern University, Illinois | 2006 | AAT 3213046 | This dissertation presents the development of a dynamic freight assignment model that captures the shipper-carrier interconnections in the freight industry. The shippers minimize their cost by choosing a carrier with the lowest shipping cost for each shipment. The freight market reaches equilibrium when no shipper can reduce its cost further by changing the carrier for any shipment. Each carrier optimizes its operations so that it can reduce its shipping costs and attract more business from the shippers. A variational inequality (VI) formulation is used to model the market equilibrium including the feedback from the carriers to the shippers. The feedback loop provides the shippers an option to change their decisions based on new shipping costs from the carriers. The cost function in the VI is obtained from a carrier sub-model that is a dynamic multi-modal multi-commodity network assignment model based on a Linear programming formulation. An iterative projection algorithm is used to solve the variational inequality. The model is further enhanced by the incorporation of contractual agreements between the shippers and carriers. This is based on the possibility of a carrier being able to offer a lower shipping cost for a shipment in return for a volume commitment from the shipper. A procedure to model the empty truck movements in the transportation network is also developed. The formulations and solution algorithms are presented in this dissertation. Simple shipper-carrier scenarios with an illustrative carrier transportation network is used to implement the solution algorithm to demonstrate the applicability of the model. |
| Apivatanagul, Pruttipong | Network design formulations, modeling, and solution algorithms for goods movement strategic planning | University of California, Irvine | 2008 | AAT 3335574 | Efficient freight transportation is essential for a strong economic system. Increases in demands for freight transportation, however, lessens the efficiency of existing infrastructure. Current practices, however, limit the number of projects that can feasibly be considered at one time. This dissertation proposes network design models which can automatically create project combinations and search for the best of these. Network design models have been studied for the passenger movements and focus on highway expansions. In this dissertation, the focus is shifted to freight movements which involve multimodal transportation improvements. A freight network design model is developed based on a bi-level optimization model. The development then involves two components. The first task is to set the freight investment problems within the bi-level format. This includes finding a suitable freight flow prediction model which can work well with the bi-level model. The second task is to provide a solution algorithm to solve the problem. The dissertation sets the framework of the freight flow network design model, identifies expected model issues, and provides alternatives that alleviate them. Through a series of developments, the final model uses a shipper-carrier freight equilibrium model to represent freight behaviors. Capacity constraints are used as a means to control service limitations since reliability issues, an important factor for freight movements, cannot be captured by steady state traffic assignment. A case study is implemented to allocate a budget for improvements on the California highway network. |
| Bherer,  Jean-Pierre | Etude de faisabilite, projet complexe et benchmarking: Le cas de la Plateforme Logistique Agroalimentaire de Longueuil | Universite de Sherbrooke, Canada | 2009 | AAT NR64213 | With over 400 000 jobs, the agroalimentary industry plays a major role in Quebec's economy. According to a number of experts, its future is in jeopardy due to market globalization. The project's sponsors believe that the establishment of an intermodal logistics platform combining highway and railway carriers would enable this industry to better control its costs. It would also help the industry address emerging issues and challenges, such as food security and bioterrorism, the saturation of transportation infrastructure, the shortage of road transportation labor, and pollution problems linked to this mode of transport. In the context of managerial issues, the author focused on the conditions needed to successfully establish the Longueuil agroalimentary logistics platform. This empirical research involved two studies. Benchmarking carried out on the most efficient logistics sites in Europe and the United States identified 12 specific success factors to this type of project. The research showed that these factors were different from generally acknowledged project management success factors. The organizational feasibility study involving 45 managers from agroalimentary and logistics industries and Quebec organizational and governmental representatives provided the opportunity to situate the project with respect to these key success factors. A comparison of the two studies established the gap to overcome to ensure the project's feasibility. An implementation strategy was then proposed. Armed with this observation on the strategic role played by project success factors, a model demonstrates the place of benchmarking within project management. Project planning modeling is then presented in order to develop a high-performance tool that could be used during the feasibility study of similar projects. By way of conclusion, the author gives full rein to his imagination, outlining a theory on success factors that promote the achievement of major, innovative, and complex projects. |
| Burks, Robert E. | An adaptive tabu search heuristic for the location routing pickup and delivery problem with time windows with a theater distribution application | Air Force Institute of Technology, Ohio | 2006 | AAT 3223088 | The time constrained pickup and delivery problem (PDPTW) is a problem of finding a set of routes for a fleet of vehicles in order to satisfy a set of transportation requests. Each request represents a user-specified pickup and delivery location. The PDPTW may be used to model many problems in logistics and public transportation. The location routing problem (LRP) is an extension of the vehicle routing problem where the solution identifies the optimal location of the depots and provides the vehicle schedules and distribution routes. This dissertation seeks to blend the PDPTW and LRP areas of research and formulate a location scheduling pickup and delivery problem with time windows (LPDPTW) in order to model the theater distribution problem and find excellent solutions. This research utilizes advanced tabu search techniques, including reactive tabu search and group theory applications, to develop a heuristic procedure for solving the LPDPTW. Tabu search is a metaheuristic that performs an intelligent search of the solution space. Group theory provides the structural foundation that supports the efficient search of the neighborhoods and movement through the solution space. This research evaluates the robustness of the developed adaptive tabu search algorithm. A linear program is developed to calculate lower bounds for the generated problem objectives. |
| Chen,Wen | New models and solutions for stochastic optimization for R&D and transportation problems | Rutgers The State University of New Jersey, Newark | 2008 | AAT 3351103 | In this dissertation we develop new models and efficient solution procedures for important stochastic optimization issues in industrial R&D and transportation. The first model deals with the problem of how a firm can decide to bring into the market a new product either by using internal research (IR) or by purchasing (or licensing) outside existing technology (ET). Finally, explicit solutions and numerical computations are given for three interesting choices for the stage duration distributions. With the second model we study an inventory system in which the retailer during each period can further optimize its response to a shortage by either choosing to ignore the excess demand or by selecting one of a fixed number of available express channels to fulfill the excess demand. In the third model we study a container shipping problem in which in every period the demand is random, production is completed at some distant location and shipping is done using containers with a high transportation fee per container. |
| Daniel, Aang | Routing and scheduling with time windows: Models and algorithms for tramp sea cargos and rail car-blocks | Georgia Institute of Technology | 2006 | AAT 3294467 | This thesis introduces a new model formulation to solve routing and scheduling problems, with the main applications in answering routing and scheduling problems faced by a sea-cargo shipping company and a railroad company. For the work in sea-cargo routing and scheduling, we focus our methodology on the tramp shipping operation. Tramp shipping is a demand-driven type of shipping operation, which does not have fixed schedules. The schedules are based on the pickup and download locations of profitable service requests. The problem is that given a set of products distributed among a set of ports, with each product having pickup and download time windows and a destination port, find the schedule for a fleet of ships that maximizes profit for a specified time horizon. The problem is modeled as a Mixed Integer Non-Linear Program and reformulated as a Mixed Integer Linear Program. Three heuristic methods, along with computational results, are presented. We also exploit the special structure enjoyed by our model and introduce an upper-bounding problem to the model. With a little modification, the model is readily extendable to reflect soft time windows and inter-ship cargo-transfers. The other part of our work is the work in train routing and scheduling. A typical train shipment consists of a set of cars having the common origin and destination. To reduce the handling of individual shipments as they travel, shipments are grouped into blocks. The problem is that given a set of blocks to be carried from origins to destinations, construct the most cost effective train routes and schedules and determine block-to-train assignments, such that the number of block transfers (block swaps) between trains, the number of trains used, and some other cost measures are minimized. The same modeling technique, with extra precedence requirements, is used. Computational results are presented. |
| Ellabib, Issmail M. | Design and analysis of ant colony system based approaches for vehicle routing problem with time windows | University of Waterloo (Canada) | 2005 | AAT NR09520 | Vehicle fleet planning is responsible for a significant proportion of economical, social, and environmental aspects of modern transportation systems. In this thesis, two prevailing planning issues are the main focus, namely, the routing of capacitated vehicles to visit all customers, and the scheduling of service to meet timing or precedence restrictions imposed on vehicle routes. In many applications where these issues appear, the problems can be formulated as the Vehicle Routing Problem with Time Windows (VRPTW). These applications encompass diverse activities such as retail distribution, school bus routing, mail and newspaper delivery, municipal waste collection, fuel and oil delivery, e-commerce, etc. The problem is typically focused on the efficient use of a fleet of capacitated vehicles that must make a number of stops to serve a set of customers so as to minimize cost, subject to vehicle capacity constraint and service time restrictions imposed at the customer locations. Due to the complexity of the problem, metaheuristics are often used for analyzing and solving practical sized instances. Recognizing the complexity and the wide applicability, this thesis addresses the VRPTW by developing Ant Colony System based approaches for solving it. Pheromone update strategies with the concept of parallel processing have been developed to come up with an approach that can solve the problem more efficiently. The main concern here is to find a useful mechanism for sharing pheromone information and to organize the interaction among cooperating colonies in a more manageable control structure. |
| Facanha, Cristiano | Life-cycle air emissions inventory of freight transportation in the United States | University of California, Berkeley | 2006 | AAT 3254307 | This study provides a life-cycle inventory of air emissions (CO 2 , NO x , PM 10 , CO, SO 2 , and Pb) associated with the transportation of goods by road, rail, and air in the U.S. It includes the manufacturing, use, maintenance, and EOL phases of vehicles, construction, operation, maintenance, and EOL of transportation infrastructure, as well as oil exploration, refining, and fuel distribution. This is the first comprehensive study to compare road, rail, and air transportation of goods in the U.S. in terms of life-cycle emissions. Even though results reflect a baseline scenario, the model also enables the differentiation of results based on alternative vehicle configurations (e.g., vehicle sizes), business practices (e.g., vehicle utilization, empty back haulage), and geography (e.g., energy mix, road grade, rail track grade). Depending on the pollutant, rail transportation rates 40-90% better than road transportation. Air transportation scored the lowest in terms of environmental performance, being from two to sixteen times worse than road transportation. However, the ranking can change by accounting for intra-modal variations (e.g., small trucks versus large trucks) and uncertainty. Results confirm that total emissions are significantly underestimated if only fuel combustion emissions are accounted for. Fuel combustion accounts for 70-90% of total emissions of CO 2 . NO x emissions tend to be more concentrated in the fuel combustion phase (70-98%). Infrastructure is the predominant phase for PM 10 emissions due to construction processes, especially for road and air transportation. Due to regulations of CO emissions from road transportation, truck manufacturing dominates CO emissions from road transportation. Fuel combustion is still the predominant phase for CO emissions from rail transportation due to lack of emission standards. Airport operations rate high in CO emissions due to the operation of ground support equipment. In terms of SO 2 emissions, road and air infrastructure are the predominant phases due to road construction processes, and ground support equipment, respectively. Fuel combustion is representative in rail transportation due to lack of fuel sulfur reduction standards. Due to the use of unleaded fuel, vehicle manufacturing is responsible for the majority of lead emissions for all three modes. Differences between tailpipe emissions and total system wide emissions can range from 2% for rail transportation's NO x emissions to an almost twenty-threefold difference for air transportation's PM 10 emissions. Therefore, it is of paramount importance to consider infrastructure, vehicle manufacturing, and pre-combustion processes, whose life-cycle share is likely to increase as new tailpipe emission standards are enforced. Fuel combustion emission factors however, are still the most important parameter influencing total emissions of CO 2 and NO x . Mode operational efficiency is of paramount importance to improve the environmental performance of freight transportation, and it can be reflected in improvements in equipment utilization and reductions in empty backhauls. Air emissions do not depend significantly on geographic location. Finally, there are significant differences between the environmental performance of freight transportation in the U.S. and Europe. |
| Fulwider, Benjamin | Driving the nation: Road transportation and the post revolutionary Mexican state, 1925-1960 | Georgetown University,  District of Columbia | 2009 | AAT 3378771 | This dissertation examines the creation of a road transportation network in Mexico during the twentieth century. This study examines several components of Mexico's transportation revolution including the planning and construction of roads, the emergence of the trucking industry, and efforts to ensure an adequate supply of cars, trucks, and buses. The study links these changes to the development of Mexico's post-revolutionary state. By examining an important development project that spanned the entire post-revolutionary period, this study offers a revised vision of Mexico's national state. The study depicts a state that drew its strength from pragmatism, flexibility, and a willingness to devolve and decentralize important decisions to local actors. This approach, especially after 1940, helped Mexico achieve remarkable economic growth but also limited who would enjoy the fruits of that growth. Finally, this dissertation demonstrates how the shift to road transportation bound the United States and Mexico into a more integrated and interdependent relationship, redefining ideas about Mexican nationalism and the legacy of the revolution. |
| Heaton, Karen L | Feedback actigraphy and sleep in long-haul truck drivers | University of Kentucky | 2007 | AAT 3298833 | Truck drivers have the highest rates of occupational motor vehicle fatalities of any job classification in the United States. The organization of their work, the environment, and the work itself place truck drivers at risk for sleep restriction, fragmentation and motor vehicle crashes. In spite of significant sleep restriction and evidence of sleep onset, truckers may not recognize themselves as sleepy. Feedback actigraphy may be a cue that influences truckers to stop driving when they are sleepy. The specific aims of this dissertation were to (1) Review select subjective measures of sleepiness commonly used in the occupational health research; (2) Identify a model for predicting the probability of falling asleep at the wheel in long-haul truck drivers; (3) Investigate the psychometric properties of the Epworth Sleepiness Scale in a sample of long-haul truck drivers; (4) Evaluate the effects of feedback actigraphy on sleep quantity and quality, attitude toward sleep, and perceived control of sleep in long-haul truck drivers. The Epworth and Karolinska Sleepiness Scales were found to be the best subjective sleepiness measures for use in the study of long-haul truckers. Along with use of medications to stay awake, the Epworth sleepiness scale predicted the probability of long-haul truckers' falling asleep at the wheel within the past 12 months and 30 days. Other predictor variables for falling asleep within the past 12 months were sleeping less than six hours per night, and driving more than six hours at night. The use of feedback actigraphy in long-haul truckers did not improve subjects' performance on any of the dependent variables in the pilot study. |
| Henrickson, Kevin E. | Labor and industrial organization topics in transportation economics: Wages and deregulation, spatial demand and competition, and intermodal rates | University of Oregon | 2006 | AAT 3224092 | This dissertation is a series of three essays examining topics in transportation economics. The first essay analyzes the effects of the deregulation of the motor carrier industry on compensation by union status. In contrast to previous studies, I find evidence that compensation premiums for surviving unionized firms who were able to compete in the deregulated environment have increased. However, since deregulation, there has been a major exodus of union firms; thus, while union compensation has not been seriously affected by deregulation and compensation premiums have increased, the number employed in the unionized sector has fallen and fallen dramatically. In my second essay, I develop and estimate a model of spatial competition between grain elevators located on the Upper Mississippi and Illinois Rivers. Using a variety of both parametric and nonparametric methods, I uncover structural breaks in the data along the geography of the network. In addition, given that shippers compete spatially, I estimate a model which incorporates spatial autocorrelations with competing elevators. The results suggest that demand elasticities vary across the spatial environment and that the presence of competitors has a sizable impact on the structure of demand. These results are of central importance to policy-makers as they call into question the assumptions made by models currently in use for measuring the benefits of inland waterway improvements, and yet, provide estimates that are easily adapted to the models used to measure these benefits. In the third and final essay, I examine railroad pricing over space. In particular, I examine how railroad rates differ in the presence of competition from other railroads, competition from other modes of transportation and competition from local users of the commodity being hauled. Using a model of market dominance, the results provide strong evidence that railroads decrease the rates that they charge to ship corn to the Northwest and to the Gulf Coast as the threat of competition from barge transportation increases and as the area production of ethanol, a local user of corn, increases. |
| Hewitt, Michael R. | Integer programming based search | Georgia Institute of Technology | 2009 | AAT 3394386 | When integer programming (IP) models are used in operational situations there is a need to consider the tradeoff between the conflicting goals of solution quality and solution time, since for many problems solving realistic-size instances to a tight tolerance is still beyond the capability of state-of-the-art solvers. However, by appropriately defining small instances, good primal solutions frequently can be found quickly. We explore this approach in this thesis by studying the design of algorithms that produce solutions to an integer program by solving restrictions of the problem via integer programming technology. Computational experiments demonstrate that the proposed approach outperforms both best-known meta-heuristics and a state-of-the-art MIP solver. In the second part of the thesis we present an IP-based search algorithm for mixed integer programs that does not depend on problem structure. Lastly, the thesis addresses the applicability of IP-based search to a real-world problem; namely the Service Network Design problem faced by Less-Than-Truckload (LTL) freight transportation carriers. |
| Hiselius, Lena Winslott | External costs of transports imposed on neighbours and fellow road users | Lunds Universitet (Sweden) | 2005 | AAT C821547 | The overall purpose is to study various external effects of the transport system; effects that are not considered (or not fully considered) today. The first paper estimates the relationship between accident frequency and homogeneous and inhomogeneous traffic flows, which is useful for calculating the marginal external accident cost of the traffic flow. We find that important information is lost if differences between traffic modes are not considered. The indication is that an additional vehicle on the road decreases the accident risk. Separating the traffic flow into cars and lorries, we find that an additional car increases the accident risk whereas an additional lorry lowers the accident risk. The second paper, a literature overview, discusses the value of road and railway safety by combining the results of psychological and economical studies. Various factors that possibly influence individuals' perception of risk and their willingness to trade risk for money are examined. We find that the use of different values within different contexts may be motivated. The findings imply, furthermore, that studies estimating the value of safety should focus not only on disparities between transport modes per se but also on disparities between accident types. In the third paper, the choice experiment approach is used to assess people's preferences regarding railway transports of hazardous materials. Exposure to hazardous materials is used to describe various transport configurations. It is shown that the choice experiment method as well as the use of exposure can be applied within this area. In the final paper, preferences regarding road transports of hazardous materials are examined. The method and design are the same as used in the previous paper but with special attention given to the presence of biases. The presence of hypothetical bias is tested for by the use of self-reported degree of confidence, and the presence of a focusing effect explored by the inclusion of information on other fatal risks. We find that there are no major differences in individual preferences regarding hazardous materials transported by rail or road. It is also found that individuals that are confident in their answers express higher values of willingness to pay (accept a compensation) for a reduction (increase) in exposure. |
| Huynh, Nathan Nhan | Methodologies for reducing truck turn time at marine container terminals | The University of Texas at Austin | 2005 | AAT 3174463 | One of the prominent issues container terminal operators in the US are seeking to address is how to effectively reduce truck turn time. Historically, c has received very little attention from terminal operators because port congestion has never been a barrier to their operations. However, with the recent explosive growth in containerized trade, terminals are straining to accommodate the truck traffic that moves through them. The heavy intermodal truck traffic is not only causing problems for terminal operators but for the public as well. The emissions from idling trucks are a hazard to people working and living in and around the terminals. With containerized trade volume expected to double in the next ten years, the problems associated with port congestion could get worse if measures are not taken to address the source of the problems. Terminals in some areas of the US are now required by state law to expedite the flow of trucks through their terminals. In California, any truck that idles for more than thirty minutes will result in a $250 fine to the terminal operator. This law has prompted terminal operators to look for ways to move trucks through their terminals faster, not just to avoid paying the fine, but also to lower the inland transportation cost of shipping a container via their terminals to remain competitive. This dissertation investigates the two measures terminal operators are taking to reduce their terminals' truck turn time. The first measure is investing in additional yard cranes to facilitate the handling of containers. To this end, this research seeks to assist terminal operators in deciding whether or not to make the investment. Statistical and simulation methodologies are developed to better understand the availability of yard cranes versus truck turn time. The second measure is implementing a truck appointment system to regulate the number of trucks into the terminal. To this end, this research seeks to assist terminal operators in evaluating the consequences of limiting truck arrivals into the terminals. Furthermore, this research develops a methodology to assist terminal operators in implementing the truck appointment system, should they decided to have one. |
| Ileri, Yetkin | Drayage optimization in truck/rail networks | Georgia Institute of Technology | 2006 | AAT 3248701 | This thesis introduces a new model formulation to solve routing and scheduling problems, with the main applications in answering routing and scheduling problems faced by a sea-cargo shipping company and a railroad company. For the work in sea-cargo routing and scheduling, we focus our methodology on the tramp shipping operation. Tramp shipping is a demand-driven type of shipping operation, which does not have fixed schedules. The schedules are based on the pickup and download locations of profitable service requests. The problem is that given a set of products distributed among a set of ports, with each product having pickup and download time windows and a destination port, find the schedule for a fleet of ships that maximizes profit for a specified time horizon. The problem is modeled as a Mixed Integer Non-Linear Program and reformulated as a Mixed Integer Linear Program. Three heuristic methods, along with computational results, are presented. We also exploit the special structure enjoyed by our model and introduce an upper-bounding problem to the model. With a little modification, the model is readily extendable to reflect soft time windows and inter-ship cargo-transfers. The other part of our work is the work in train routing and scheduling. A typical train shipment consists of a set of cars having the common origin and destination. To reduce the handling of individual shipments as they travel, shipments are grouped into blocks. The problem is that given a set of blocks to be carried from origins to destinations, construct the most cost effective train routes and schedules and determine block-to-train assignments, such that the number of block transfers (block swaps) between trains, the number of trains used, and some other cost measures are minimized. The same modeling technique, with extra precedence requirements, is used. Computational results are presented. |
| Jeong, Jaehoon | Wireless sensor networking for intelligent transportation systems | University of Minnesota | 2009 | AAT 3389327 | This dissertation studies the Wireless Sensor Networking for Intelligent Transportation Systems, tailored and optimized for road networks. For military scenarios, since the road networks are used for main maneuver of military troops in cities or urban areas, they need to be protected for military operations. For civil engineering scenarios, the Intelligent Transportation Systems have been developed and been evolving to support the driving safety and transportation efficiency through the information computing and can be communications among transportation infrastructures and vehicles. Roadways are mainly used for the transportation of people and goods and also are nowadays equipped with intelligent devices, such as electronic tollgates and variable message signs for driving. In addition to this, vehicles are equipped with GPS-based navigation systems and emergency notification systems for the driving efficiency and safety. With this trend, Wireless Sensor Networks have been considered new parts for the Intelligent Transportation Systems and are being deployed into road networks in order to enhance further the driving safety and security. This dissertation studies the key technologies in the wireless sensor networking for the security and communications in the road networks as follows: (i) Localization for sensor location, (ii) Road Surveillance for vehicle monitoring, (iii) Data Forwarding for road sensing data delivery and (iv) Reverse Data Forwarding for road condition information sharing. In order to design the technologies to be tailored for road networks, this dissertation investigates the characteristics of road networks and takes advantage of the characteristics for the wireless networking. The first characteristic is the predictable vehicle mobility within the roadways. The second is the abstract representation of the layouts of the road networks into road maps. The third is the vehicular traffic statistics representing the vehicle density on the roadways and intersections. The fourth is the vehicle trajectory representing the future vehicle mobility along the roadways, guided by the GPS navigation systems. These four characteristics open a door of new research on wireless sensor networks. Therefore, using these road network characteristics, this dissertation designs and evaluates the wireless sensor networking technologies for road networks. |
| Johns, Kimberly D. | Biofuels in the European Union: A multi-level analysis | University of Illinois at Chicago | 2009 | AAT 3364608 | This dissertation examines the factors influencing policy tool decisions in response to a European Union directive regarding the use of biofuels for transport. This study provides a comparative analysis of twenty-five nations during the first four years of implementation (2004-2007). A typology and descriptive analysis of the policy tools employed by each nation is presented. In addition, a multi-level analysis is conducted to discern the effects of specific variables on both the diversity of policy tools chosen and individual policy decisions. Tool diversity is measured as the number of tool types implemented each year by the individual nation. The analytical model focuses on six constructs: international obligations, institutional factors, energy capacity, external interaction with industry, academia, and community groups; prior commitment to biofuels use, and social factors. The primary data were yielded from ninety-five national annual reports submitted to the European Commission. The findings reveal several patterns of policy adoption. Over time, tool diversity increased, and certain tool types demonstrated distinct patterns of adoption. The results of the multi-level analysis show prior commitment and external interaction to be positive and significant predictors of tool diversity. Time is also a consistent and significant determinant of tool diversity and adoption of certain tool types. The second phase reveals relationships between other independent variables and individual tool types that are obscured in the diversity model. The findings have several implications for policy tools and policy learning. First, certain variables have stronger relationships to particular tool types. Second, the significance of prior commitment demonstrates to the potential for accumulated knowledge to lead to policy innovations. Third, external interaction with varied groups leads to the adoption of a greater diversity of tools. This finding points to the rising significance of networks in governance. Additional research is needed to understand how policy networks influence both the range of policy options considered and subsequent policy decisions. |
| Kaisar, Evangelos I. | A stowage planning model for multiport container transportation | University of Maryland, College Park | 2006 | AAT 3222641 | The ship turnaround time at container terminals is an important measure of a port's efficiency and attractiveness. The speed and quality of load planning affect the length of turnaround time considerably. Container operations are extremely important from an economic standpoint, making them a prime target for productivity improvements. In addition, load planning is a very complex problem, since the planners have to account for the stability of the ship and rely on a variety of other stochastic processes. Unfortunately, the load-planning problem is NP-hard making it difficult to obtain an optimal solution in polynomial time. Heuristics that trade quality for tractability are therefore promising tools when coping with this problem. Efficient load planning is accomplished by formulating the stowage-planning model to minimize extra shifting as a mixed integer-programming problem. The key contributions of this dissertation are as follows: (1) A mathematical model is developed which considers real life constraints and considering loading/unloading along the entire voyage. (2) A second mathematical model is formulated to obtain a lower bound on the value of the objective function of the exact solution. (3) A heuristic procedure is developed that is guide by practical considerations that account for the structure of the stowage-planning problem. All proposed mathematical models and heuristic are validated with experimental results. In all cases, these results demonstrate the stability, flexibility and efficiency of the model, and establish its potential as a versatile and practical method for large scale container loading. |
| Kordab, Imad Hani | Bilevel optimization methods to evaluate intermodal freight transportation investments in Colombia | Harvard University | 2009 | AAT 3350969 | In this thesis we posit a set of optimization models to answer the research question of efficiently selecting infrastructure investment projects on intermodal freight transportation networks in a developing economy. In answering such a question, we present a network design problem as a single level optimization model of an intermodal route assignment problem subject to an investment budget constraint. We then formulate another version of the network design problem as a bilevel mixed integer nonlinear programming problem where we include the investment costs as part of the decision variables in the objective function rather than through a budget constraint. We evaluate a proposed inter- modal freight transportation corridor between the eastern region of Llanos and the western Pacific port of Buenaventura in Colombia. Our findings suggest that both the single level and the bilevel models have their advantages and limitations and neither is superior over the other as a tool for evaluating investments in intermodal freight routing. We find that these models are useful tools for assessing and evaluating transportation corridor projects at the strategic planning level. |
| Lacasse-Guay, Eve | Affectation des types d'avions aux vols avec contraintes de maintenance | Ecole Polytechnique Montreal  (Canada) | 2009 | AAT NR57166 | The interaction between the fleet assignment problem and the aircraft routing problem is studied in this thesis. Given a weekly schedule, the fleet assignment problem assigns an aircraft type - a fleet - to each flight. This assignment must not exceed the number of aircraft available, must respect the flow conservation constraints and aims to maximize the anticipated profits. Once the fleet assignment is known, the aircraft routing problem is solved for each aircraft type. An aircraft route is a sequence of flight legs, connections and waiting periods. Moreover, an aircraft route must contain a maintenance check at a prescribed frequency. In this thesis, the aircraft routing problem is studied on a weekly horizon. The work of this thesis aims at integrating maintenance planning in the fleet assignment problem. To achieve this goal, two parts are presented. The first part proposes a multicommodity model for solving the aircraft routing problem. This model is solved by the commercial solver Cplex and builds aircraft routes that respect the maintenance constraints. When it is impossible to do all the required maintenance checks, the model identifies aircraft routes that cover all flights and provides the number of delays on the maintenances. The second part of this work is devoted to the integration of maintenance constraints in models for the fleet assignment problem. First, using a multicommodity model generally used for this problem, we propose the addition of maintenance constraints that provide a better maintenance management. The second type of constraints is generated as needed in a cutting plane method. The separation algorithm for these constraints uses a column generation algorithm applied to a problem separable by aircraft type. In summary, this thesis proposes a new model for the aircraft routing problem, two new solution approaches to solve the combined fleet assignment and the aircraft routing problem and, finally, a classification of the literature on the aircraft routing problem. |
| Lantz, Brenda M. | The effects of technologies on commercial vehicle company safety and service: A supply chain perspective | The Pennsylvania State University | 2006 | AAT 3248357 | Because of the importance of safety, and the potential benefits for both the general public and the commercial vehicle industry of improving safety, the main goal of this project was to identify those commercial vehicle-related technologies that, through successful adoption, have had a positive impact on the safety of motor carrier companies. This was examined through two perspectives---one simply examining the effect of a technology implementation on safety, and the second identifying the effect of a successful adoption of a technology on safety. It was hypothesized that technologies with factors that lead to successful adoption will have a greater safety impact. The models for on-board safety monitoring technologies (that did not rate high on average for any adoption factor) illustrated no significant effect on safety; however, the models for technologies in both the freight mobility area and the electronic clearance area illustrated a negative effect on safety. The main implication of this study for both commercial vehicle companies and government agencies is that simply implementing a technology, or advocating implementing a technology, may not give a desired result, and in some cases may even result in a negative impact on safety. The company needs to take the time to learn the technology and integrate it fully into the company in the right way in order for it to have a positive impact. |
| Mahendra, Anjali | Institutional perspectives on road pricing: Essays on implementation, response, and adaptation | Massachusetts Institute of Technology | 2008 | AAT 0821248 | Road pricing involves charging road users a fee for the external social costs of using private vehicles. These costs typically remain unaccounted for in routine road transport operations and benefit-cost analyses. They include the costs of travel delays for other road users due to congestion, the costs of air pollution and greenhouse gas emissions, and the health costs resulting from exposure to pollutants and road accidents. This dissertation focuses on the institutional challenges to implementation of road pricing that have not received adequate attention in literature, through three papers on the following topics. (1) Vehicle Restrictions in Four Latin American Cities: Is Congestion Pricing Possible? (2) Potential Impacts of Road Pricing on Businesses and Freight Transport: The Case of the Netherlands (3) Implications of the London Congestion Charge for Firms in Key Economic Sectors: Influencing Factors, Impacts, and Responses. The findings of this paper are valuable for other cities planning the implementation of road pricing. |
| Malaguzzi Valeri, Laura | Essays on regulation, deregulation and institutional changes | University of Michigan | 2005 | AAT 3192716 | This dissertation focuses on the economic effects of institutional changes, with special attention to the role of government intervention. The economic structure that is in place and any restriction a government imposes or lifts determine how economic agents, be they consumers or firms, respond to the incentives they face. Gauging their response is crucial from an economic policy perspective. It is instrumental in defining how policies affect the economy and in determining their welfare effects, that is identifying who gains and who loses following institutional changes. Two basic steps are necessary to this end: first, identifying the actual economic structure in place and second, determining how policy changes interact with the existing economy. |
| Mohd Satar, NurulHuda | An empirical test of modal choice and allocative efficiency: Evidence from US coal transportation | The University of Wisconsin, Milwaukee | 2009 | AAT 3405084 | This dissertation examines whether coal shippers use an allocatively efficient mix of transportation services. Attaining such efficiency is significant in part because cost of hauling coal constitutes a large share of its delivered price. Past research examining bulk transportation services prior to the enactment of pro-competitive policies reveals an inefficient allocation of such services because rates did not account for the full cost of transportation, especially for rail service along single provider routes. However, there is a dearth of research examining the allocative efficient use of transportation services following these policies. Coal shippers should benefit from the enactment of pro-competitive policies if rates fully reflect the opportunity cost of using different modes of transportation. However infrastructure and capacity constraints that limit modal choices might create a business environment that allows carriers to engage in the monopolistic pricing schemes that prevailed prior to the enactment of pro-competitive policies. Monopoly pricing allowed carriers to avoid charging high prices for low quality service. Past research observes that rail carriers were most likely to engage in this pricing behavior when shippers faced a lack of inter- or intra-modal competition. To capture the distortion in prices due to a lack of modal choice, this dissertation estimates a generalized transportation cost function for two groups of shippers. One group includes shippers with accessibility to all major transportation modes and the other includes shippers whose choices are limited to only rail and trucking services. Findings indicate that shippers with limited choice of transportation modes use an allocatively inefficient combination of transportation services, whereas shippers who have access to all major modes of transportation use an allocatively efficient combination. |
| Motuba, Diomo Nanje | A truck-based urban planning model: Typology, model development and validation | North Dakota State University | 2009 | AAT 3391583 | Historically, transportation planning efforts in urban areas have focused primarily on the passenger mode. This research developed a long haul urban planning model for the Fargo-Moorhead (North Dakota and Minnesota) region using a three-stage model; trip generation, trip distribution and trip assignment. The model was developed for three industrial groups: retail, manufacturing and transportation and warehousing. The freight model developed was then combined with a passenger planning model with it were evaluated. Truck trip generation and OD data were collected for the Fargo-Moorhead (ND-MN) metropolitan area using surveys. OLS models were used to develop truck production and attraction equations with the number of employees as the independent variable for three industrial groups: retail, transportation and warehousing and manufacturing. The results indicated that the number of employees was statistically significant in predicting truck trip productions and attractions with the rates different from each other. The gravity model was used to distribute trips that had at least one end in the study area. For external-external (EE) trip surveys using license plate recognition technology were used to develop EE origin-destination tables. The trips were then assigned to the network using the equilibrium assignment technique. The model developed was validated against observed EE OD table and truck traffic counts. Deviation from the observed EE OD to the models output table was found to be less than 1%. The modeled truck volumes replicated 84.44% of the truck counts. The validated model was then incorporated into the passenger model by applying heavy adjustment factors into the capacity of the passenger models link. Combining the passenger and truck models had significant impact as it resulted in a 10% redistribution of passenger trips. The combination also improved the passenger models replication of observed traffic counts from 68% to 72%. |
| Nemani, Ashish Kumar | Combinatorial approaches to solve scheduling problems | University of Florida | 2009 | AAT 3400291 | In this dissertation, we discuss classical scheduling problems especially in transportation industries. All of these problems come from real life applications and are very critical from the academic as well as the financial point of view. Being NP-hard problems there doesn't exist any well-defined algorithm which can solve them efficiently with good running time, and thus rules of thumbs are still being followed in practice, with very myopic use of optimization procedures. These decisions are usually worth billions of dollars per year and even a slight improvement will have a significant economic impact. Through efforts described in this document, we try to develop some holistic approaches along with heuristics, to get efficient and effective results for these decision problems. This proposed work has the potential of implementation in commercial grade software. We first suggest some hybrid approaches to solve the intermodal load planning problem, which generate very effective solutions within minutes. In our second problem, subset-disjoint minimum cost cycle problem, we suggest several exact and heuristic approaches to find the minimum cost cycles which contains at most one node from any subset. These problems occur very often as a subproblem of other combinatorial problems. In the third problem, location routing problem, we suggest column generation algorithm and show its effectiveness by doing experiments with benchmark problems. In our last problem, which is very critical in all railway industries, we propose several models based on based on mixed integer programming, heuristics, and other hybrid approaches. These algorithms show a significant improvement over the current practices. |
| Novoa, Clara M. | Static and dynamic approaches for solving the vehicle routing problem with stochastic demands | Lehigh University, Pennsylvania | 2005 | AAT 3188502 | This research focuses on the vehicle routing problem with stochastic demands (VRPSD). The VRPSD occurs in the delivery of industrial gases and the restocking of retail stores. Our research studies the VRPSD from two different perspectives. Our first method (Part I of this dissertation) solves the multiple VRPSD under a two-stage approach and new recourse actions that include customers completed by other vehicles and the re-scheduling of extra-trips. The second method (Part II of this dissertation) constructs the route dynamically in multiple stages using current information about vehicle capacity. We model the problem as a Markov Decision Process and use a rollout algorithm (RA) for computing the solution. Both two-stage and dynamic approaches exhibit considerable advantages over following deterministic solutions from VRP The best rollout solutions result from merging the two previous approaches. |
| Ozener, Okan Orsan | Collaboration in transportation | Georgia Institute of Technology | 2008 | AAT 3346046 | In this thesis, we investigate synergies between participants in transportation and distribution systems and we explore collaborative approaches to exploit these synergies to reduce transportation and distribution costs. Implementing collaborative approaches not only involves identifying and exploiting synergies between system participants, but also entails allocating any benefits fairly among them. We study collaboration in two environments: truckload transportation and vendor management inventory replenishment. The first part of the thesis addresses the cost allocation problem of a collaborative truckload transportation procurement network. More specifically, we study a logistics network where shippers identify collaborative routes with few empty truck movements in order to negotiate better rates with a common carrier. We investigate how to allocate the cost savings, or equivalently the cost, of these routes among the members of the collaboration. In the second part of the thesis, we investigate collaboration opportunities among carriers. When several carriers have to satisfy truckload transportation requests from various shippers, they may reduce their transportation costs by exchanging requests. In the last part of the thesis, we study vendor managed inventory replenishment. Vendor managed inventory replenishment is a collaboration between a supplier and its customers. We design a mechanism capable of computing a cost-to-serve for each customer that properly accounts for the synergies among customers. |
| Park, Minyoung | Capacity modeling for multimodal freight transportation networks | University of California, Irvine | 2005 | AAT 3198651 | Since the early 1990's, public policies for transportation planning have evolved towards modally balanced transportation systems, requiring planning agencies to more precisely evaluate the capacity of their transportation systems, considering all feasible modes as well as low-cost capacity improvements. However, existing methods for capacity analysis are limited to either an individual facility or a single mode network, and thus appear insufficient for multimodal systems capacity analysis. This dissertation presents an advanced method for capacity assessment that can serve as an analytical tool for strategic planning of freight transportation systems, particularly from a multimodal perspective. The multimodal network capacity model proposed in this research takes a mathematical form of a nonlinear bi-level optimization problem with an embedded user equilibrium network assignment problem at its lower level. The bi-level problem, referred to as the MNCP model in this thesis, is comprehensive in the sense that many crucial factors are incorporated including multiple modes and commodities, behavioral aspects of network users, external factors, as well as the physical and operational conditions of a network. The numerical tests designed to illustrate the application of the proposed MNCP model indicate that the algorithm developed for solving the bi-level problem has been successfully implemented. These results show the capability of the model not only to estimate the capacity of a multimodal network, but also to identify the capacity gaps over all individual facilities in the network, including intermodal facilities. By incorporating more precise capacity measures into the planning process, planning agencies would benefit from the MNCP model in articulating investment priorities across all transportation modes, thus achieving their goal of developing sustainable transportation systems in a cost-effective manner. |
| Patterson, Tai Zachary | Freight shipper mode choice in the Quebec City-Windsor Corridor and its impact on carbon dioxide emissions | McGill University  (Canada) | 2007 | AAT NR32230 | The Quebec City - Windsor corridor is the busiest and most important trade and transportation corridor in Canada. The transportation sector is the second largest greenhouse gas (GHG) emission category in the country. Governments around the world, including Canada, are considering increased mode share by rail as a way to reduce transportation emissions. To understand whether freight mode shift is a realistic means to reduce transportation emissions, an analytical model is needed that can predict the effect of government policy on mode split. This thesis provides background on the freight transportation-GHG nexus in Canada and describes the development, implementation, reasoning behind, and results of, a Stated Preference shipper carrier choice survey for the Quebec City - Windsor corridor conducted during the fall of 2005. It then describes how the resulting carrier choice models are used to estimate the potential to displace truck traffic to rail (premium-intermodal) under current conditions, as well as to test the effectiveness of different possible future policy or service offering scenarios. The results show that premium-intermodal has the potential to capture a substantial share of traffic between the main destinations in the Quebec City - Windsor Corridor. However, its ability to contribute significantly to reducing CO 2 emissions is limited. According to the analyses conducted, potential reductions are considered to be in the range of nil to 0.413 Mt--a fraction of what the federal government was hoping to be able to achieve through "further public-private collaboration to promote the use of intermodal freight opportunities and to increase the use of low-emission vehicles and modes" (Government of Canada 2002). At the same time, these potential reductions are based on a small proportion of total truck-related emissions and a few city-pairs. Extension of the current analysis to more city-pairs separated by longer distances might arrive at different conclusions. |
| Razakamanifidiny, Patrick Dany | Preparer une firme-reseau dans le transport routier des hydrocarbures  le cas de TOTAL Madagascar | Universite de Sherbrooke and Universite du Quebec a Trois-Rivieres  (Canada) | 2009 | AAT NR50585 | In a dynamic context, a network firm is more and more suggested in scientific writings as a prevalent strategy to develop several firms in subcontracting link in order to satisfy the needs of their customers asking for products which are complex to manufacture. This study is developed inside the framework of an intervention-research applied to the case of the oil distribution company TOTAL Madagascar. 71 weeks of intervention actions carried out with 27 subcontracting firms of hydrocarbon road transport located to Antananarivo are recorded within this framework. One of the critical elements in the oil distribution in Madagascar is the scarcity of the subcontracting firms of hydrocarbon road transport which are able to meet the required quality criterions. A lack of management standards observed in several small and medium enterprises of hydrocarbon road transport, a growth of the number of tankers accidents, and an insufficiency of individual resources to develop competences constitute the main reasons which explain this scarcity. By this way, a preparation step of a network firm was developed in order to increase the management competences of the subcontracting firms of hydrocarbon road transport, and to develop their capacity of collective learning. The realization of these activities had been allowed: 44 managers of 27 participating firms to be trained, certified and sensitized with the network firm practice, 78% of the participating firms to be enthusiastic to pass to the creation of a network firm, and the enterprise pivot TOTAL Madagascar to record a significant diminution of the number of tankers accidents which is passed from 10 (77% of the total number of the tankers accidents) at the beginning of the process in 2003 to 5 (36%) at the end of this process in 2005 and to 3 (27%) in 2007. These tangible and positive results seem to prove the commitment of firms participating in the preparation step of the network firm. In this way, it is appropriate to put the hypothesis according to the experience done within the framework of this study that could be considered as a learning trajectory type of the preparation step which efficiently stimulates the intention of the participating firms to be organized in network. This present case, through these results, strengthens the consideration according to the success of the network firm which depends in the efficiency of the change process related to its preparation. |
| Ritter, Matthew John | Effects of animal handling and transportation factors on the welfare, stress responses, and incidences of transport losses in market weight pigs at the packing plant | University of Illinois at Urbana,  Champaign | 2007 | AAT 3270010 | The objective of this dissertation was to determine the causes of dead and non-ambulatory pigs at US packing plants and to identify management strategies to reduce these transport losses. Four studies involving a total of 297 trailer loads of market weight pigs (n = 42,283) were conducted within a Midwestern US production system to determine the effects of various pre-slaughter stressors and management strategies on physical indicators of stress (at loading and unloading) and transport losses. Pigs were loaded using commercial procedures and were transported 2 to 4 h to a commercial packing plant. Three studies established that transport losses were minimized when pigs were provided with transport floor spaces of 0.46 m 2 /pig or greater. However, the effects of transport floor space on transport losses were dependent upon season in one study, and this warrants additional research. Distance moved during loading was evaluated in two separate studies. Both studies demonstrated that pigs moved long distances (47 to 91 m) had 2-fold higher (P < 0.01) rates of open-mouth breathing during loading than pigs moved short distances (0 to 30 m), but distance moved during loading did not affect transport losses at the plant. The effects of mixing unfamiliar pigs during transport (mixed vs. unmixed) and feed withdrawal prior to loading (0 vs. 24 h) were evaluated. Although not statistically significant, transport losses were numerically reduced by ∼50% for pigs that were fasted 24 h prior to loading and for pigs that were not mixed during transport. Trailer design (pot-belly vs. straight deck) and season did not affect (P > 0.05) total transport losses, but the incidence of total non-ambulatory pigs was higher (P < 0.05) in the winter than in the spring and summer. A fifth study involving 64 market weight pigs at the University of Illinois Swine Research Center established that pre-slaughter stressors (aggressive handling, restricted transport floor space, and long distances moved) have additive effects on rectal temperature, blood acid-base balance, and longissimus lactate concentrations. Collectively, these studies identify causes of transport losses and demonstrate that it is possible to handle and transport pigs with minimal stress responses. |
| Root, Sarah Elizabeth | Models and algorithms for addressing complex constraints and objective functions: Applications from freight transportation and medical resident scheduling | University of Michigan | 2007 | AAT 3276280 | In this dissertation, we develop models and algorithms to solve complex, real-world scheduling problems arising in the application areas of freight transportation and medical resident scheduling. In freight transportation, we present the load matching and routing (LMR) problem and explain how the non-linear cost structure, time windows of each of the loads and large-scale nature of the problem pose challenges to optimization methods. Although traditional approaches such as multi-commodity flow models can be modified to address LMR, these modifications make multi-commodity flow models intractable for all except trivially-sized problem instances. We instead develop a model where the variables (called clusters) are designed to capture both the time-windows and non-linear cost structure implicitly within the variable definition. The resulting mathematical program has significantly fewer constraints; however, the number of variables is much larger. We next describe how our cluster-based modeling approach can be extended to capture additional problems faced by express package carriers-trailer assignment and equipment balancing. |
| Sangkapichai, Mana | Transportation and the environment: Essays on technology, infrastructure, and policy | University of California, Irvine | 2009 | AAT 3384613 | With soaring oil prices and growing concerns for global warming, there is increasing interest in the environmental performance of transportation systems. This dissertation contributes to this growing literature through three independent yet related projects essays that deal with transportation technology, infrastructure, and policy. |
| Senese, James A. | Managing post-merger corporate culture: A case study of two mergers in the United States transportation industry | The University of Oklahoma | 2007 | AAT 3242156 | One topic often disregarded when a merger is planned is how the corporate cultures of the two companies will react with each other when the companies are brought together. Since every organization has a unique culture, it is possible that the two cultures could clash and undermine the benefits of the merger by reducing productivity, disrupting operations, disturbing the supply chain, or alienating customers. This dissertation examines and discusses---in case study format---the different approach the leadership of two organizations took to manage corporate culture in their transportation industry mergers. One company proactively sought to recognize and adopt the best cultural characteristics of both pre-merger partners. The other company chose to rapidly integrate two competitors with an expectation that the culture of the acquired organization would be assimilated into the culture of the new owner. Using descriptors coined by Harrison and Stokes in 1992, the first case study examines a merger that featured the combination of a company with a power culture with a competitor that had a support culture. According to senior management, both cultures contributed to the financial success of the predecessor companies. With the approaching merger, however, the leadership team recognized that a clash of the different values, attitudes, and driving forces could be detrimental to the new company. The second case studies the merger of two competitors that sought to build a larger end-to-end network. In this case the post-merger culture change (P. M. C. C.) methodology consisted simply of requiring that the acquired company adopt the rules and practices of the acquiring company. The creation of these case studies has contributed to the body of knowledge by providing the rationale, results, and consequences that might be analogous to other organizations considering a post-merger culture change. The two mergers selected for this research represent the extreme ends of the change spectrum. Since no two mergers are alike, this case study research provides information that may be of value to those considering a merger or acquisition. Merger participants should take into account such factors as the workforce size, geographical distribution, strength of collective bargaining agreements, and tenure of employees when making post-merger culture change decisions of their own. |
| Silas, Michael Anthony | An investigation on off-hour delivery policy design using optimal incentives and a behavioral micro-simulation approach | Rensselaer Polytechnic Institute,  New York | 2009 | AAT 3385668 | The objectives of this dissertation are to provide insight in designing off-hour delivery programs by developing: (1) policies to optimally distribute financial incentives to receivers gained from various funding mechanisms; (2) methods to simulate the behaviors of receivers and carriers pertaining to off-hour deliveries; (3) an understanding of how different market segments influence OHD operations; and (4) an understanding of how policy design will increase participation in off-hour deliveries. These objectives were achieved through policy mathematical models and a Behavioral Micro-Simulation framework developed here. The mathematical policy models developed in this dissertation serve as guidelines to optimally distribute financial incentives, and to finance them through cases considering an exogenous budget and regular-hour penalties. In general, the optimal incentives found depend on: (1) the class elasticity to off-hour deliveries; (2) the average number of class tours per receiver; (3) the tour elasticity; (4) the cost to move tours to the off-hours; (5) the revenues collected from penalties; and (6) the inverse off-hour delivery market share. Using these optimal solutions, numerical experiments were conducted to prove that: (1) tours can be shifted to the off-hours when receivers are given incentives to accept off-hour deliveries; and (2) the penalties considered were all effective at generating a budget for OHD incentives. The analyses done using the Behavioral Micro-Simulation revealed several key results: (a) financial incentives given to receivers in exchange for accepting off-hour deliveries, and financial rewards to carriers making off-hour deliveries would increase participation in off-hour deliveries; (b) time of day toll surcharges have no major impact on increasing off-hour deliveries; (c) carriers located close to their urban customers are more likely to participate in off-hour deliveries as they can easily begin to accrue the benefits from off-hour delivery operations; and, (d) increased enforcement of parking fines for double parking during the regular hours could increase the number of carriers participating in off-hour deliveries. |
| Spann, Gwendyl Patrice | WebQual: The perception of Website quality as it relates to intermodal business segments | Webster University, Missouri | 2006 | AAT 3269294 | Today websites are a critical link between the customer and the company. Until recently, there has not been an effective way to capture the opinions of website quality, other than the number of hits or visits to a particular website. In 2000, Dr. Eleanor Loiacono created WebQual, which evolved from the survey instrument, ServQual. This study uses WebQual to determine the customers' perception of website quality. WebQual now utilizes four constructs: Usefulness, Ease of Use, Entertainment, and Complimentary Relationships. WebQual is further categorized into 12 dimensions. The combination of the 12 dimensions determines the quality perception from the end users' viewpoint. More specifically, this study looks at the *quality* of a Midwestern transportation company's website based of the perceptions of three Intermodal Business Segments: International, Premium and Domestic. The study determines the customers' overall perception of the website's quality and determines if this perception varies among the different Intermodal Business Segments. |
| Warier, Prashant | Dynamic decision support for regional LTL carriers | Georgia Institute of Technology | 2007 | AAT 3271617 | This thesis focuses on decision support for regional LTL carriers. Regional carriers deliver about 60% of their shipments within a day and almost all of their shipments within two days. Furthermore, most drivers get back to their domicile at the end of each day. Therefore, the focus of the thesis is the development of effective and efficient decision models supporting daily operations of regional LTL carriers which provide excellent service at low cost. This thesis presents an effective solution approach based on two optimization models: a dynamic load planning model and a driver assignment model. The dynamic load planning model consists of two parts: an integer program to generate the best paths for daily origin-destination freight volumes and an integer program to pack freight into trailers and trailers into loads, and to determine dispatch times for these loads. Techniques to efficiently solve these integer program solutions are discussed in detail. The driver assignment model is solved in multiple stages, each stage requiring the solution of set packing models in which columns represent driver duties. Each stage determines admissible driver duties. The quality and efficiency of the solution approach are demonstrated through a computational study with real-life data from one of the largest regional LTL carriers in the country. An important "technique" for reducing driver requirements is the use of meet-and-turn operations. A basic meet-and-turn operation involves two drivers meeting at a location in between terminals and exchange trucks. A parking lot or a rest area suffices as a meet-and-turn location. This ensures that drivers return to the terminal where they started. More sophisticated meet-and-turn operations also exist, often called drop and hook operations. In this case, drivers do not exchange trucks, but one of their trailers. The motivation in this case is not to get drivers back to their domicile, but to reduce load-miles. The thesis presents analytical results quantifying the maximum benefits of using meet and turn operations and optimization techniques for identifying profitable meet-and-turn opportunities. |
| Wong, Chi Fat | Delivery planning under uncertainty in logistics and express industry | The Chinese University of Hong Kong  (Hong Kong) | 2007 | AAT 3295079 | In this dissertation, we aim to investigate some delivery planning problems under different aspects of uncertain conditions in order to present some insights on how to develop more efficient and effective logistics solutions in the challenging, dynamic and competitive industry of express delivery nowadays. Two delivery planning problems and one travel time estimation model under various aspects of randomness are addressed in this dissertation. The first delivery planning problem considers an extension on a well-known problem--the vehicle routing problem with time windows (VRPTW), where the travel time required between each delivery location is a stochastic variable, instead of a fixed value. We name this version of the VRPTW as a vehicle routing problem with time windows and stochastic travel times (VRPTWST). A two-stage stochastic integer programming with recourse model is developed and its objective is to minimize the vehicle travel cost together with the expected loss due to the violation of the delivery time windows. The focus of the second delivery planning problem addressed in this dissertation is switched to the randomness of the demands at the delivery locations. We consider a single-depot problem in which a large volume of packages have to be delivered in a dense and small area with a lot of high-rise buildings within an extremely tight delivery commitment time window. At each vertex, the package volume (i.e. demand) is a highly stochastic variable and its service time is also dependent on the demand. This version of problem is typically faced by express service providers which offer premium express services to customers that are protected by the money back guarantee (MBG) condition. We name this version of problem as a *time-constrained vehicle routing problem with stochastic demands and service times* (SVRP-D). Since both the demand and service time of a vertex are stochastic, the vehicle capacity and the commitment-time (i.e. deadline) constraints may not be satisfied after the demands are realized, and recourse action is thus necessary to "rescue" the "infeasible" delivery plan through additional effort and cost. Three typical recourse actions are independently considered: (1) restocking; (2) outsourcing; and (3) reassignment. A two-stage stochastic integer programming is proposed such that the first-stage problem is to determine a set of a priori routes which minimize the vehicle travel cost and the cost for any known recourse actions. Dependent on a first-stage solution, the second-stage problem is to decide the optimal recourse plan with least cost according to the pre-determined recourse action. Lastly, we introduce a travel time estimation method which can be considered as an upstream extension on the first delivery planning problem or any routing problems that require travel time in a road network as an input parameter. |
| Xu, Dongsheng | Resource allocation among multiple stochastic demand classes in express delivery chains | Hong Kong University of Science and Technology | 2007 | AAT 3256265 | With the trend of globalization and increasing transportation volume, the express delivery has been developed as a major branch of international shipment and supply chain management. In express delivery chains, multiple demand classes with various levels of urgency and importance as well as the demand uncertainty are two key issues to the delivery performance. In this dissertation, we consider three resource allocation problems among multiple stochastic demand classes, which are differentiated by the system scope and the distance along the delivery chain from express hubs to customers. In the system-wide level, we perform a heavy traffic analysis to the single vehicle loop in an automated storage and retrieval system. We show that the loop configuration, which has received little research attention, has a major impact on the cargo waiting time. Analytical models are established and empirical studies are conducted. The conclusions suggest that a substantial improvement can be achieved by making proper adjustments to the loop configuration. In the facility-wide level, we study a routing problem in integrated automated shipment handling systems, where a critical decision is the route selection linking various origins (e.g., system gate points) and destinations (e.g., storage racks). |
| Xu, Jing | Shipper-carrier cooperation in outsourcing logistics via contract and execution | Hong Kong University of Science and Technology | 2009 | AAT 3398671 | The thesis studies the shipping contract and the process of execution aiming at enhancing shipper-carrier cooperation and communication in the shipping process. Free cancellation of shipment booking causes conflict in interests of carrier and shipper and prevents optimization techniques from being used. Therefore, a new contract form with a discount term is proposed to benefit both shipper and carrier. The discounted freight rate is offered only for early confirmed booking which requires zero cancellation. The discount allows the shipper to reduce shipping cost and get a higher service level, while the use of confirmed booking helps carrier to stabilize demand and enables better revenue management and operation planning. Two stochastic models are developed to study shipper's behavior with single carrier. The first model minimizes shippers shipping cost with the optimal confirmed booking volume being calculated from the distribution of show-up volume. An algorithm is developed to find the distribution, followed by the proof of strongly consistence. The second model adds the consideration of service level. We prove that the booking decision and shipment assignment are independent and thus solvable like Model 1. Numerical results demonstrate the impacts of demand characteristics on shipper's booking behavior, showing that the optimal volume of confirmed booking reveals shipment show-up probability. For the carrier, a small discount can be enough to encourage the shipper to use confirmed booking. In the multiple-carrier problem, a new booking and assignment policy is designed for the shipper to make decisions when some carriers offer discounts for confirmed booking and other carriers do not. The proposed policy is proved to be feasible and satisfying the MQC requirement, while enabling the shipper to make the best use of the discount. The new policy shifts the no-show risk of demand from participating carriers to non-participating carriers. This forms a strategic game for the carriers and pushes them to participate in the new contract, so that in the unique Nash Equilibrium, the shipper as the creator of the game can minimize its total cost as all carriers participate. |
| Xu, Ning | A dynamic model of integrated production-transportation operations | Rensselaer Polytechnic Institute,  New York | 2008 | AAT 3342887 | The Integrative Freight Market Simulation (IFMS) aims at developing a comprehensive urban freight transportation demand model, which includes three key dimensions of the freight system: (1) financial, by focusing on profit maximization; (2) commodity flows, that represent demand; and (3) vehicle trips, the logistical response of the supply side to satisfy consumer demands. This thesis focuses on the development of analytical formulation to estimate urban freight-related flows for integrated shipper-carrier operations in the IFMS framework. The problem studies how the suppliers adjust production level, profit margin, and routing strategy in response to the competition, until Walrasian equilibrium is reached satisfying the following conditions: (1) the suppliers' profits are maximized, they are not able to earn more by changing their own business strategies; (2) the consumer demands are satisfied; and (3) the market clears, and no inventory is left. |
| Yates, Justin Timothy | Network-based risk mitigation and resource evaluation in the transportation of hazardous materials and terrorist threat | State University of New York at Buffalo | 2008 | AAT 3320471 | The expanse of U.S. transportation systems has helped to facilitate persistent national economic growth, its ease of access and reliability vital to the plethora of users who utilize daily the established infrastructure. Recent events have shown cause for concern, however, as the vulnerability inherent in such transportation systems has been exploited by the calculated attacks of highly motivated individuals and groups who have used these networks to target the connected critical infrastructure and human populations. This research focuses on the protection of large geographic regions, and the critical components contained within, in their susceptibility to covert attacks using hazardous materials vehicles as the tool of implementation. Focusing on the detection and interception of such attacks, this work introduces three mathematical models responsible for the placement of varying types of sensors within a geographic region of interest and employs a hypercube spatial queuing model to ascertain response unit functionality and capability given the sensor network schema. The regions of Lancaster-Palmdale, California and Northridge, California are used in the systematic examination of model performance and solution characteristics. A case study within the region of Los Angeles County, California is offered as a demonstration of the success of the model to cope with networks and parameters of realistic scope and scale. The results of model implementation show trends in the application of sensor networks as a means to regional vulnerability reduction and infrastructure protection and illustrate the relationship between sensor placement and the successful instantiation of a response team and the allocation of its individual units. The complete model relies heavily on a Geographic Information System (GIS) for the manipulation and management of all network and sensor data and combines integer programming and queuing theory concepts in the development of an integrated detection and interception model for the protection of multiple points of critical infrastructure within a large geographic region. |
| Yoon,  Dae-Gwun | Analysis of truck delays at container terminal security inspection stations | New Jersey Institute of Technology | 2007 | AAT 3334396 | After September 11, 2001, special attention has been given to the vulnerability at container transportation to terrorist activities. United States Customs and Border Protection (CBP) has set up inspection stations for containers at seaport terminals to screen containers, but this practice affects the truck turnaround time in the seaport by generating additional processing delays. This dissertation analyses the additional truck turnaround time incurred at the inspection stations under various levels of security. Queuing models were used to estimate truck delay as containers are inspected at two successive security inspection stages. Each stage may utilize one or more inspection equipment. The objective is to determine the number of equipment needed to keep the total delay at an acceptable level. Homeland security, CBP, seaport terminal officers, truck and marine carriers may use this research to develop an effective and efficient plan for handling marine freight and containers. |
| Zajac, Mateusz | Reliability model of intermodal transportation | Politechnika Wroclawska  (Poland) | 2007 | AAT C830079 | The goal of dissertation is to create reliability model of intermodal transportation taking into account process of ageing transshipment machines and transportation vehicles. Initial and final phase of transport is road transport phase, the second and the fourth transshipment phases, the third train transport phase. Definition of intermodal transportation and current transportation system situation in Poland are presented in chapter 2. The third chapter consist of dissertation goal and scope. Latest reliability model of intermodal transport is presented in chapter 4. This model is created by Markov chain, where exponential distribution of probabilities are assumed, transshipment phases aren't taken into account. The fifth chapter includes five-phases reliability model of intermodal transport, described by Markov model (without ageing processes). Availability function is accepted as prime function describing reliability of transport system. In chapter 6 five phases model was described by semi-Markov process, what made possible to take into account ageing of transshipment machines and transport vehicles. There was comparison of phases models in chapter 7. Model with phases of transshipment gave proper values of availability. Chapter 8 consist of information about data collection in 2006 in Poland. Chapter 9 presents results of computations based on data taken from real system. How it is shown, the highest values of availability is prescribed to transshipment phase (A=0,996), the lowest in train transport phase (A=0,956). When shadings of time dedicated to rail phase increase, than level of availability decrease (to A=0,968). This situation is because rail vehicles used in Poland are old and intensities of failures is high. |
| Zhang, Guangming | Operational flexibility in drayage vehicle routing: Multi-resource routing problem with flexible tasks | Northwestern University, Illinois | 2007 | AAT 3284281 | In this dissertation, we explore modeling and solution methods for intermodal drayage operations. This research is motivated by the need to provide operational choices in drayage operations to increase efficiency; however, as shown in our work, the introduction of this flexibility in modeling and solution methods is challenging. Intermodal freight transportation often includes modes such as rail, truck, and maritime between shippers and consignees. Drayage refers to the regional movement of loaded and empty equipment (trailers and containers) by tractors, and it is the most costly part of intermodal operations. Drayage movements are typically less than 50 miles, but consist of fairly complex operations, involving multiple intermodal and equipment yards, as well as multiple shippers and consignees. The objective of the drayage coordination problem as defined in this research is to schedule tractor and trailer movements at minimum cost by reducing the number of tractor trips needed and the number of empty miles traveled, which are also referred to as "non-revenue-generating trips". This dissertation considers the Multi-Resource Routing Problem (MRRP) with flexible tasks as a method to model the routing and scheduling problems arising in drayage operations. Tasks may be either well-defined, in which both the origin and the destination of a movement are given, or flexible, in which the origin or the destination is chosen by the model. Several issues arise when solving an MRRP with flexible tasks. This dissertation focuses on: (1) the generation of feasible executions for flexible tasks; (2) the generation of feasible tractor routes; (3) the selection of near-optimal routes; and (4) the inclusion of future task requests. In this dissertation, we propose and evaluate new methods to address these four issues. |

Code 10: Warehousing and Storage

| **Author** | **Title** | **Institution** | **Year** | **Number** | **Abstract** |
| --- | --- | --- | --- | --- | --- |
| Ayodhiramanujan, Karthik | Integrated analytical performance evaluation models ofwarehouses | Oklahoma State University | 2009 | AAT 3372155 | This research effort pertains to the development of integrated analytical models that address capacity/congestion and inventory issues simultaneously in warehouse systems. The first part of the dissertation focuses on the development of a queuing network model of the “shared-server system,” which is an inventory store with a server performing both storage and retrieval operations. The second part of the dissertation focuses on the development of a queueing-inventory (QI) model of an order-picking system. The last part of the dissertation focuses on the development of an integrated model that demonstrates the applicability of these key building blocks (the shared-server system and the order-picking system) in developing an end-to-end model of the warehousesystem. Extensive numerical experiments indicate that the proposed analytical models can be solved in a computationally efficient manner and are accurate for a wide range of parameter values when compared with simulation estimates. |
| Cho, Nayoung | Integrated network design models for crossdocking and warehousingstrategies with tactical considerations | Purdue University | 2009 | AAT 3378712 | In this thesis, we identify the critical operational characteristics for various distribution strategies, and then develop integrated distribution network design models by taking into account those operational factors. The first part of this thesis presents a crossdocking network design problem for a two-stage and single commodity supply chain. We present a capacitated crossdocking network design model that minimizes the total logistics cost while controlling the lead times, inventory levels, and load-balancing. The proposed heuristics that are based on Lagrangian relaxation show good performance in terms of solution quality as well as computational requirements. The second part of this thesis is devoted to warehouse capacity acquisition-location models. The objective of this research is to develop integrated models for designing optimal or near optimal capacitated warehouse-distribution networks by determining the number, the location, the capacities, as well as the inventory policy of warehouses simultaneously. Heuristics based on Lagrangian relaxation are proposed. The third part of this thesis compares crossdocking and warehousingdistribution strategies in a quantitative form. First, we introduce analytical models, which approximate the supply chain network design for both crossdocking and warehousingsystems. Specifically, we consider a two-stage, single product, and single plant supply chain. Next, we present simulation models to compare these two strategies when the retailers face stochastic demand. We determine the number of distribution centers and inventory policies at the distribution centers and the retailers. Finally, we offer some managerial insights regarding the type of distribution strategies and the associated operational policies that may be appropriate for a given business environment. |
| Chow, Ka Ho | Knowledge based decision support system in the design and control of warehouse operations | Hong Kong Polytechnic University  (Hong Kong) | 2008 | AAT 3347736 | This research paves the way for a novel approach to support decision making processes of policy selection and resource allocation in warehouse operations. The system, termed the Knowledge-based Decision Support System (KDSS), is proposed and constructed to support the decision making processes for the capture of logistics data, logistics information analysis and knowledge manipulation during the design and control of warehouse operations. To validate the feasibility of the proposed system in aiding the decision making processes during the resource allocation and policy selection stage, two case studies have been conducted in GENCO international logistics service company (USA) and in Eastern Terminal Logistics (ETL) freight forwarding company (Hong Kong), using the suggested approach. In both cases, the building of an essential domain into KDSS is critical. It is found that the efficiency of overall warehouse operations in these two companies is greatly improved, implying that KDSS is beneficial to other logistics service companies and industries that contain warehouse operations |
| Hamdan, Amer | A methodology to establish warehouse productivity measures and warehouse efficiency using DEA | The University of Texas at Arlington | 2005 | AAT 3179124 | In this research, a methodology for establishing and implementing warehousing performance measures is developed. This quantitative methodology is focused on labor productivity, since labor cost is the largest single cost component of general warehousing and distribution. Also, a new warehouse efficiency model is presented to evaluate the overall efficiency of a group of warehouses at the enterprise level where multiple inputs and multiple outputs are involved. This model is developed using Data Envelopment Analysis (DEA) as a multi-factor productivity model for measuring the relative efficiencies of a homogeneous set of Decision Making Units (DMUs), or in this case, the set of warehouses used in the study; where the relative efficiency score of each warehouse is calculated in the presence of multiple inputs and multiple outputs. The primary objective of the presented “restricted” DEA model is to move from technical efficiency towards overall efficiency. The relative efficiency scores for the warehouses used in the study were analyzed before and after the use of weight restrictions. And finally, using the DEA efficiency scores (DEA results) and performing sensitivity analysis and hypothesis testing, we were able to address some of the characteristics and debates around specific warehousing issues. |
| Johnson, Andrew | Methods in productivity and efficiency analysis with applications to warehousing | Georgia Institute of Technology | 2006 | AAT 3212245 | Previously in the literature, a two-stage method has been developed to investigate the impact of practices and attributes on efficiency. When applying this method to two sets of warehouse data, two issues arose: how to measure efficiency in small samples and how to identify outliers. The small sample efficiency measurement method developed in this thesis is called multi-input/multi-output quantile based approach (MQBA) and uses deleted residuals to estimate efficiency. The outlier detection method developed in this thesis introduces the inefficient frontier. Both overly efficient and overly inefficient outliers can be identified by constructing an efficient and an inefficient frontier. The outlier detection method incorporates an iterative procedure previously described, but not implemented in the literature. Further, this thesis also discusses issues related to selecting an orientation in super efficiency models. These issues are addressed using two data sets recently collected in the warehousing industry. The first data set consists of 390 observations of various types of warehouses. The other data set has 25 observations from a specific industry. For both data sets, it is shown that significantly different results are realized if the methods suggested in this document are adopted. |
| [Kile, Justin Wayne](javascript:void(0);) | Design of walk-and-pick order fulfillment systems | University of Michigan | 2006 | AAT 3237994 | The objective of this research was to answer two important questions, which relate to the operation and design of walk-and-pick investigated the order hatching problem, both in theory and in practice. This study found that certain special cases or variants of the order hatching problem are solvable, while other cases of the problem are NP-hard. A Mixed Integer Programming (MIP) model was developed and used to obtain near-exact solutions. The MIP provided good lower and upper bounds to the problem, which proved useful in the investigation of the heuristic solution procedures. An additional MIP model was presented to find exact solutions. An order batching heuristic was presented, which shows strong results in a numerical experiment. Although good solutions are obtained with this particular heuristic, the results indicate that it is computationally intensive. Furthermore, solutions obtained through the MIP model suggest there is still room to obtain even better solutions, via heuristic procedures, although the challenge is to do so without further increasing computational burden. The second question investigated the assignment of tours to individual pickers, to ensure that pickers are not overworked, while completing all tours as quickly as possible. A method for determining a good lower bound for this problem was introduced, as well as a heuristic that provides near-optimal solutions to the problem. In order to utilize this particular heuristic, the number of pickers in the system is needed; therefore, two methods for determining the number of pickers needed by the system were developed. |
| Lam, Marco | Three essays on clustering in location routing problems | The University of Alabama | 2008 | AAT 3373606 | In this research, we introduce the production planning - multi-depot location routing problem (PP-MDLRP). The PP-MDLRP is a multi-period extension of the multi-depot location routing problem (MDLRP). Because the PP-MDLRP is NP-hard, we develop decomposition based heuristic approaches. In Chapter 3, we develop a capacitated hierarchical clustering heuristic to solve the MDLRP. Because hierarchical clustering does not require a priori assumptions about the number of clusters, we propose two stopping criteria: minimum number of clusters required and change in within cluster variation. In Chapter 4, we test the performance of the two stopping criteria introduced in Chapter 3 under varying assumptions and compare the performance of our heuristic approach with existing heuristics and metaheuristics proposed in the literature. Results indicate that on average the minimum number of clusters stopping rule provides better solutions than the change in variation stopping rule after the descent heuristic improvement phase. However, each stopping rule finds a better solution for 1/3 of the cases. In Chapter 5, we develop two decomposition based heuristic approaches for the PP-MDLRP. Results show that after the improvement phases, the mixed decomposition approach provides better solutions than the functional decomposition approach in 94% of our test cases. The relative difference in heuristic performance is affected by the underlying problem structure. In particular, the interaction among number of warehouses, number of areas with a high concentration of customers, and the fraction of customers that are located in these areas is statistically significant. |
| Pohl, Letitia M. | Improving unit-load warehouseswith new aisle designs | University of Arkansas | 2009 | AAT 3361722 | Gue and Meller have developed innovative new designs that improve upon traditional aisle layouts by reducing expected travel in unit-load warehouses*.* The new aisle designs incorporating the flying-V cross aisle and fishbone aisles were developed to reduce travel to a single storage location under a random storage policy. The purpose of this research is to more fully develop the flying-V and fishbone designs by considering issues such as dual-command travel (Contribution 1) and nonuniform storage (Contribution 2). We also investigate a new aisle design to further reduce expected dual-command travel in unit-load warehouses(Contribution 3). In Contribution 1 we develop an analytical expression for the expected travel-between distance in a fishbone warehouse*.* Combining this expression with the previous expression for single-command travel distance, results in an analytical expression for expected dual-command travel distance. We also compare the performance of fishbone under dual-command operations to traditional warehouse designs and show reductions in travel distances of 10-15%. In Contribution 2 we investigate the performance of flying-V and fishbone for both single-command and dual-command operations under turnover-based storage policies. We compare their performance to three traditional aisle layouts under random storage and under turnover-based storage using three ABC curves: 20/40, 20/60 and 20/80. The flying-V cross aisle is preferred over the traditional layouts for single-command travel in most instances, but is generally not recommended for warehousesthat perform 100% dual-command operations and use a turnover-based storage policy. The fishbone design performs better than the traditional designs for all the warehouse sizes and operating conditions we evaluated. For single-command travel, the improvement is 10-20% for medium-sized to large warehouses*.* Improvement in dual-command travel distances is 6-16% across all warehousesizes. Our study has also shown that for all five aisle layouts, the warehouseshape and aisle structure that performs best under random storage also performs well under turnover-based storage for both single- and dual-command operations. Contribution 3 investigates a new aisle design for unit-load warehousesthat perform 100% dual-command operations. We find that the inserted cross aisle reduces expected travel-between distances over a fishbone warehousefor medium-sized and large capacity warehouses*.* Fishbone triangle improves on traditional *warehouses* with middle cross aisles for those same warehousesizes by 10.6% and 11.7%, respectively, but requires a larger warehousearea. |
| Sobanski, Eric Benjamin | Assessing lean warehousing: Development and validation of a lean assessment tool | Oklahoma State University | 2009 | AAT 3386955 | This research was undertaken to fill a gap in the academic literature and in practice by developing a comprehensive lean implementation assessment tool for warehousingoperations implementing lean manufacturing principles and techniques. *.* The specific lean constructs identified from the lean manufacturing literature that are measured in the lean implementation assessment tool developed in this research are visual management, standardized processes, continuous and leveled flow, pull systems, workplace organization, empowered employees, quality assurance, and continuous improvement. Each of the key constructs was assessed for all the major functional areas applicable within each warehouse. The lean constructs identified were further developed working within multiple warehousingfacilities, each in various stages of lean implementation with unique characteristics and industries to enhance the generalizability of the lean implementation assessment tool developed in this research. The lean constructs are refined and operationally defined through onsite analysis and multiple assessor use to ensure cross-facility applicability and multiple assessor perspectives. The operationally defined and scored evaluation items were aggregated to determine scores at the facility level, individual function level, and individual construct level to provide usable feedback and analysis. The data collection process identified specific areas of improvement and provided feedback with regard to the implementation and utilization of lean warehousing principles. Furthermore, the implications of the underlying factors and structure of assessment, implementation, and practice are examined based on the findings from the application of the lean implementation assessment tool. |
| Topcu, Aysegul | A heuristic approach based on golden section simulation-optimization for reconfigurable remanufacturing inventory space planning | Northeastern University | 2009 | AAT 3369773 | The focus of this dissertation is on decision-making and modeling issues that arise in facility and warehouse designs in a remanufacturing context. Key components that decision-support systems need to address in such settings include uncertainty in yield rates and demand, reconfigurable and flexible designs, interdependencies between returned products, and type of inventory control system. In order to address the above important issues, a mixed-integer, multi-period and multi-component stochastic programming recourse (SPR) optimization model has been developed which identifies optimal schedules of internal, external, and reconfigured amounts of inventory space for a given time period. It is recommended that heuristic methodologies be used to overcome the resulting problems of solving large combinatorial optimization models. In addition, results from these models are compared to the expected value formulations which result in a much higher minimum cost solution, underscoring the potential value in the SPR modeling approach. In order to better emulate a generalized remanufacturing facility with random receiving patterns, component yields, and refurbished demand over multiple time periods, a Monte Carlo simulation model has been developed. Finally, a heuristic approach based on a multi-dimensional golden section search algorithm is implemented to identify the optimal storage capacities and reconfiguration decisions that minimize long-term expected total costs. The computation time with the heuristic approach is successfully reduced by 97% from 49.2 hours to 83.9 minutes with a higher number of inventory capacities. In several cases, total cost with this approach tends to be only 0.67% higher, which is sufficient in practical applications. Using the heuristic approach, the savings from reconfiguration are calculated under different yield rate and cost scenarios. The results demonstrate that reconfiguration becomes very important and can save a company substantial sums when the difference in yield rates among part types is high. |
| Zhang, Min | Designing the layout and routing of a manufacturing facility to mitigate workflow congestion | State University of New York at Buffalo | 2007 | AAT 3291548 | The first part of this work discusses the notion of workflow congestion in the context of material handling equipment interruptions in a manufacturing or warehousing facility. Development of a combination of probabilistic and physics-based models for workflow interruptions permits evaluation of the expected link travel time. To calibrate our modeling process we develop an object-oriented simulation model which explicitly considers various workflow interruptions. Our major finding is that re-routing of traffic in a congested facility can significantly alleviate congestion delays and improve the efficiency of material movement. A managerial insight derived from this work is that re-routing is most effective in medium traffic intensity situations. In the second chapter, we present a model labeled Full Assignment Problem with Congestion (FAPC), which simultaneously optimizes the layout and flow routing. A branch-and-price algorithm is proposed and a computational study is performed to verify its effectiveness as a solution methodology for the FAPC. A numerical study confirms the benefits of simultaneous consideration of layout and routing when confronted with workflow congestion. Three conclusions are offered from our work. First, a combination of re-layout and re-routing is a more powerful way to mitigate the impact of workflow congestion rather than using just the re-layout or just the re-routing options. Second, it is important to model workflow congestion in a manufacturing facility--namely, ignoring it can result in a significantly poor design. Third, the QAP layout is dominated by the FAPC layout for situations of medium workflow intensity. In the third part, we present the modeling details of the simulation model that captures different instances of interruptions especially including pedestrian traffic and acceleration/deceleration factors. The importance of this work stems from the realization that we apply the statistical results from the simulation model that is of high fidelity to analytically study and measure workflow congestion in a factory. |

Code 11: Inventory

| **Author** | **Title** | **Institution** | **Year** | **Number** | **Abstract** |
| --- | --- | --- | --- | --- | --- |
| Atali, Aykut | Quantitative modeling in inventory management with imperfect information | Stanford University | 2007 | AAT 3242517 | In this dissertation, we design and build sufficiently general inventory/production models that capture the complexity of an operation and incorporate available information. In the first part of the dissertation, we present a general formulation of a multi-item production problem addressing two important features observed in practice. In the second part of the dissertation, we investigate the inventory record inaccuracy problem and the value of visibility in inventory management. In existing computerized inventory systems, the discrepancy between the inventory records and sales-available on-hand inventory distorts the replenishment process. The systems fail to order when they should or carry unnecessary inventory due to early replenishment. We show that the main sources of discrepancy between inventory record and physical stock can be grouped under three classes: shrinkage, misplacement, and transaction errors. We explicitly model how different error sources lead to inventory discrepancies. We then demonstrate how companies should manage their inventory in the presence of unobserved inventory discrepancies. Finally, we quantify the *true* value of inventory visibility, as well as the value of reduction of some of the error sources offered by the latest technologies such as RFID (Radio-Frequency Identification). |
| Basinger, Karen L. | Impact of inaccurate data on supply chain inventory performance | The Ohio State University | 2006 | AAT 3238207 | This research explores data inaccuracy and its impact on supply chain inventory performance. Theft and data entry error cause differences between the physical inventory levels and inventory levels recorded in the computer system. Physical inventory counts are one method commonly used to align physical and recorded inventory levels. Expected benefits of new technology, such as radio frequency identification (RFID) include improvements in the accuracy of supply chain data, including possibilities of real-time alignment of the data. This research looks at the factors of theft, order error, lead time, synchronization frequency, demand variability, stock-out policy, two separate ordering policies and their impact on inventory performance in a three-level supply chain setting for a single item. The order policies considered are the reorder point (ROP) policy with a fixed order quantity and the order-up-to (OUT) policy with a variable order quantity. Simulation modeling is used to analyze factor impacts on the service level degradation, inventory level degradation, and inventory inaccuracy. Factors and performance measures are analyzed at the system level and the individual echelon level. |
| Bates, Jonathan J. | A dynamic inventory/maintenance model | University of South Florida | 2007 | AAT 3306852 | A model is proposed to provide inventory and maintenance guidance for a system of operating parts. This model is capable of handling a system with multiple operating components, unknown part lifetime failure distribution, and separately maintained parts. In this model, part reliability characteristics are used along with system costs to predict the required stocking levels and part replacement times. Two maintenance strategies are presented that have the unique characteristic of allowing flexible scheduling of replacements. A case study is completed comparing developed stocking policies to an existing policy. An estimation selection method is introduced and fit into the model for computing Weibull distribution parameters when part reliability is not well known. An algorithm is displayed that describes the implementation of the system model and data from practical case scenarios are conducted using this algorithm. |
| Beardslee, Eugene A. | Dynamic optimization of service part inventory control policy through applied data mining and simulation | University of Oklahoma | 2007 | AAT 3256647 | This research defines a novel approach for associating inventory item behavior, focusing initially on demand patterns, with an optimal inventory control policy. This method relies upon the definition of typical service part inventory demand patterns and the ability of data mining algorithms to classify inventory transaction data into one of these defined demand patterns. To facilitate this data mining effort, a simulation which creates archetypal inventory demand time series is proposed as the training data source for the data mining task. Actual service part inventory transactions thus classified will be used in a separate service part inventory simulation, modeling a multi-item inventory controlled using a set of common stochastic inventory control policies. Through simulation optimization, using simultaneous perturbation stochastic approximation (SPSA), an optimal demand-pattern to control-policy pairing is sought. The resulting set of optimal pairings will then be used to determine the optimal policy which should be applied to actual service part inventory items after performing demand classification data mining of the actual inventory transaction time series. Improving the efficiency of inventory management within the maintenance and repair service business area holds great promise for reducing inventory investment and improving customer service. Ideally, application of this research could enable an inventory management system which supports the use of multiple concurrent and dynamic inventory management policies focused on reducing inventory cost and increasing customer service and complex equipment availability. |
| Boone, Christopher A. | Managing service inventory in the supply chain | Auburn University | 2006 | AAT 3225249 | This dissertation incorporates three distinct yet related research efforts, each exploring a different aspect of the evolving role of service parts inventory management in today's supply chain environment. The first effort utilizes a field-based comparison of a system approach to service parts inventory management and a traditional item-based approach to service parts inventory management. Results suggest that a system-based approach to service parts management is more effective in reducing the number, duration, and magnitude of service part related disruptions than the more traditional item-based approach. The second effort relies on a Delphi panel of service parts experts to highlight the most critical challenges of service parts management. Consensus was achieved amongst the panel members regarding the ten most critical challenges and opportunities for future research were proposed. The final effort relied on a grounded approach to identify the challenges and objectives of service parts management and resulted in the development of two descriptive models. Each model presents a broad perspective and provides a basis upon which future research can build. |
| Chen, Ching-Yu | Essays on supply chain inventory management | Rutgers The State University of New Jersey, Newark | 2008 | AAT 3351102 | This thesis is composed of two parts. Part I, develops models that integrate inventory planning with project management in project-driven supply chains. Part II studies multi-echelon inventory models with batch ordering policy and compound Poisson demand. Project-driven supply chains (PDSCs) are combinations of project activities and their supporting material supply chains where the demand for the latter is driven by the material requirement of the former. In Chapter 2, we present a modeling paradigm to help firms make material supply and project decisions jointly in PDSCs under the guaranteed service-time assumption. In Chapter 3, we relax the guaranteed service-time assumption to allow for stochastic service-times in which the material lead times are stochastic. In Chapter 4, we study multi-echelon tree-structure supply chains in which external demand follows a compound Poisson process, and each stage employs a continuous-time policy. We present an analytical framework to characterize the probability distributions of inventory levels and stock out delays. We propose procedures to approximate the internal demand processes and lead time distributions. A dynamic programming algorithm is developed to search for the optimal reorder points (subject to approximations). A numerical study is conducted to demonstrate the efficiency and accuracy of the approximations. |
| Choi, Sungyong | Risk-averse newsvendor models | Rutgers The State University of New Jersey, Newark | 2009 | AAT 3387965 | I study the impact of risk aversion on the optimal ordering quantity. For single-product models, I obtain closed-form optimal ordering quantity under coherent measures of risk and closed-form approximation under exponential utility function. For a large but finite number of products, I also obtain closed-form approximations under the both risk measures when product demands are independent. My approximations are as simple to compute as the risk-neutral newsvendor solutions and the gap between the optimal solutions and approximations quickly converges to zero as the number of products increases. Then I prove that the risk-neutral solution is asymptotically optimal under coherent measures of risk, as the number of products tends to be infinity. The same proposition is proved under exponential utility function, as the ratio of the degree of risk aversion to the number of products goes to zero. Thus, in both cases, risk aversion has no impact in the limit. Demand dependence significantly affects the optimal ordering quantity. I derive analytical and numerical insights for the interplay between demand correlation and risk aversion. All these results are consistent with our insights and confirmed by numerical examples from my computational study. I conclude my dissertation by comparing risk-averse newsvendor models and financial portfolio optimization models. |
| Cluver, Brigitte Gaal | Consumer clothing inventory management | Oregon State University | 2008 | AAT 3336382 | This present research develops a model that describes and explains the process of consumer clothing inventory management. Data show that consumers’ clothing inventories can be categorized accordingly: active, permanent inactive, temporary inactive, invisible, inactive, and transitional inactive. Within permanent inactive inventories were items that informants believed they would never dispose; such items often symbolized various connections and/or held hedonic value. Within temporary inactive inventories were items that informants believed they would eventually dispose; such items were often stored because informants were waiting to find future opportunities to use the items or the best disposal outlets. Occasionally, clothing items were invisible to informants, made so either unintentionally or intentionally. Clothing items within transitional inactive inventories were those items that informants had taken psychological and behavioral steps towards disposing of, yet still retained possession. Data collected were used to develop a Consumer Clothing Inventory Management Model. The model explains what causes consumers to store versus dispose of inactive clothing items and provides direction regarding the identification of ways to encourage consumers to pass inactive items on to others who can use them. |
| Deniz, Borga | Essays on perishable inventory management | Carnegie Mellon University | 2007 | AAT 3302992 | My dissertation addresses a number of challenges in perishable inventory management in supply chains. Essay 1 reviews the literature on supply chain management, of perishable products that have a fixed or random lifetime, primarily focusing on challenges introduced by aging of such products. Essay 2 considers a discrete-time supply chain for perishable goods where there are separate demand streams for items of different ages. Essay 3 studies replenishment policies for perishable goods when substitution is possible between items of different ages. We analyze different order-up-to level type replenishment policies and compare their performance with each other as well as the optimal policy. We provide analytical results on optimality of our proposed policies for some special cases. Also structural properties of our policies are investigated. A comprehensive computational study is conducted using a various demand distributions and parameter settings. Based on our study we find that NIS (order-up-to inventory replenishment policy based on new items only) is closer to optimal compared to TIS (older-up-to inventory replenishment policy based on total inventory). We also observe that when items are significantly more valuable than older items NIS is more robust than TIS against demand fluctuations. |
| Feng, Qi Annabelle | Inventory models with forecast updates: Multiple delivery modes and service constraints | The University of Texas at Dallas | 2006 | AAT 3210656 | This study examines different aspects of inventory planning approaches under these objectives. We provide below a brief description of the results obtained for the specific problems considered in this study. In the first problem discussed in chapter 2, we present a periodic-review inventory model with multiple delivery modes. In the second problem, we consider a two-stage newsvendor model. In chapter 3, we study long-term type I service targets (probability of satisfying the demand). In chapter 4, we analyze long-term type II service targets (proportion of demand satisfied). We discuss how to evaluate these service measures and compare ordering policies under different planning approaches. In chapter 5, we extend the two-stage newsvendor problem by allowing for order cancellation at the second stage. Optimal ordering decisions are derived and are compared with those without the cancellation option. We further consider the supplier's production planning problem. A two-stage buy-back contract is proposed to coordinate the channel decisions. We also discuss how the channel profit is split between the vendor and the supplier. |
| Giesen, Ricardo | Online inventory replenishment and fleet routing decisions under real-time information | University of Maryland, College Park | 2007 | AAT 3260452 | This dissertation examines effectiveness of policies for managing inventories taking into consideration the interaction between inventory replenishment, retailer sequencing and transportation cost. A major motivation for the online inventory routing problem is the presence of uncertainty about future consumption rates at different facilities. The possibility of updating plans on a continuous basis, based on real-time information about demand realizations makes possible decisions to modify the set and/or the sequence of subsequent facilities to be visited, diverting a truck from its current destination to visit a different facility, and adjusting amounts to be delivered to subsequent customers in the route. This dissertation proposes two decomposition approaches, in which a simplified version of either the inventory-control or the routing side is solved first, and then that solution is used as a soft constraint when solving the other side. For each approach, different operational polices are proposed, reflecting different degrees of sophistication in terms of technology and optimization capabilities. These operational policies are based on a rolling-horizon framework, wherein new plans are repeatedly generated, based on updated information. Finally, the performance of proposed strategies is simulated and the impacts of using sophisticated real-time strategies are discussed. |
| Hamister, James W. | Impact of category management practices on performance of FMCG supply chains | State University of New York at Buffalo | 2007 | AAT 3291516 | This dissertation investigates the impact of Category Management practices on the performance of fast moving consumer goods (FMCG) supply chains. The major hypotheses are that, first, increased adoption of category management elements may be positively related to supply chain performance. Second, increased adoption of the various supply chain management initiatives may also be positively related to supply chain performance, mediated by increased supplier partnering. This dissertation has several theoretical and managerial objectives. First, a theoretical model describing the relationship spanning two research streams in the operations management and marketing areas is developed. Second, this research empirically validates the theoretical model through survey research specifically in the FMCG sector. The FMCG sector is important to the US economy, but has received relatively insufficient attention. Third, this research may also offer practical guidance to retailers and suppliers within the FMCG sector for improving performance, with implications for both consumer satisfaction and increased firm performance. |
| Han, Chaodong | The impact of globalization on inventory and financial performance: A firm-level and industry-level analysis | University of Maryland, College Park | 2009 | AAT 3372853 | This dissertation investigates how globalization affects inventory and financial performance from both firm and industry perspectives. Essay 1 contributes to the supply chain management literature by providing a two-dimensional measure of globalization: foreign market penetration (depth) and geographic expansion (breadth), and may enhance our understanding of global supply chains. The second essay analyzes the impact of global inbound and outbound supply chains on inventory performance within the U.S. economy. This research argues that global activity (i.e., global sourcing and exports) has offsetting effects on domestic inventory levels: an increasing impact due to risk considerations and a decreasing impact due to cost pressure from rising inventory costs. In summary, this dissertation comprehensively investigates the impact of global supply chains on inventory performance and financial performance in the context of multinational firms and U.S. domestic manufacturers and hence is expected to enhance our understanding of global supply chain management theory and practices. |
| Hu, Xinxin | The effect of production uncertainty on optimal production-inventory policies in monopolistic and competitive settings | University of Michigan | 2006 | AAT 3208471 | This dissertation systematically studies and compares different mechanisms that help firms to integrate operational improvements with the production and inventory control policies. The first essay aims to compare advance demand information and safety capacity option. Two of the most interesting findings are that (1) in general, conditions that make better demand information more valuable make the option to outsource less valuable (and vice versa) and (2) the combined effect of both options can be greater than the sum of the individual effects. It is thus able to provide managers with some guidance on how to think about their need for more safety capacity or better information (or both) when dealing with uncertainties. The second essay extends the above results and considers a firm with two plants having unreliable capacity. The firm’s two alternatives include cooperative planning and transshipment, both of which help to reduce the uncertainty in demand and in capacity. The essay shows how the capacity uncertainty influences firms' production and transshipment decisions. Through a numerical study, we explore situations where implementing the optimal policy is most beneficial. The model allows us to evaluate the benefits of flexibility resulting from two sources of capacity combined with the benefits of transshipment, and to quantify some of the claims used in the collaborative planning programs. The remainder of the dissertation is dedicated to a study of decentralized system and focuses on the feasibility of coordination. |
| Jain, Aditya | Logistics issues in stochastic inventory models | University of Rochester | 2006 | AAT 3230305 | This dissertation is a collection of three essays on the joint optimization of inventory and logistic decisions. We study stochastic inventory models in which products sourced from a single make-to-order supplier can be shipped by two alternative freight modes differing in lead-times and costs. The inventory model in the first essay is a continuous review model, whereas the model considered in the second essay is a periodic review inventory model with inventory holding and back order penalty costs incurred continuously in time. For these models, we derive the optimal policy for the freight mode decision orders of arbitrary size. Further, given that each order is shipped optimally using the two freight modes, we characterize the optimal policy for placing orders. For the continuous review model, we solve for the optimal reorder point and order quantity. We provide a geometrical representation of the optimal solution, enabling easier understanding of and useful insights into the solution. For the periodic review model, we show that the optimal policy for placing orders in not a simple (s, S) policy. We provide bounds for the optimal policy that are tight and are simpler to compute. Further, we characterize the best (s, S) policy for the model and compare it with the optimal policy. For both continuous and periodic review models, we dual freight model with single fright models. In the third essay, we analyze stochastic inventory system of a firm that faces random delays in its shipments. For this system, we model and analyze various strategies for mitigating the risk of shipment delays. We provide a comparison of these strategies and establish the complementarity of operational flexibility and lead-time visibility. |
| Khawam, John Habeb | Warranty inventory management and supplier decision models | Stanford University | 2009 | AAT 3382944 | In high-volume situations, warranty inventory management involves many complexities such as stochastic demand rates, probabilistic requests for credit instead of replacement, probabilistic repairs, multiple sources of supply originating from both the stochastic reverse channel and the company’s purchasing decisions, and, in some cases, batching of remanufacturing. In this dissertation, we firstly formulate several related warranty inventory system models that aim to minimize inventory levels while meeting service level constraints. Next, we consider several related models that incorporate the intricate cost structures that are often present in warranty inventory systems. We formulate two-stage models in which the company first makes a strategic decision on testing and remanufacturing capacities; then, in the second stage, the company aims to minimize inventory costs when faced with various levels of visibility into pipeline inventory in the reverse channel. We also evaluate the cost of ignoring the learning curve. First, we explore a model with deterministic parameters and then expand the model to include a stochastic learning portion. |
| Kim, Chiwon | Dynamic inventory management with expediting | Massachusetts Institute of Technology | 2008 | AAT 0821058 | We study the optimal expediting and regular ordering policies of a serial supply chain with a radio frequency identification deployment at each installation. We identify systems, called sequential, that yield simple and tractable optimal policies. For sequential systems, outstanding orders including expediting do not cross in time. For such systems, we find that the optimal policies of expediting and regular ordering are the base stock type policies. The directional sensitivity of the base stock levels with respect to expediting costs is also obtained. We provide an important managerial insight on the radio frequency identification technology: we need to actively use the additional information from the radio frequency identification technology through new business processes such as expediting to unveil more benefits from the supply chain. On the other hand, orders may cross in time for systems that are not sequential, thus in such a case optimal policies are hard to obtain. We propose a heuristic for such systems and discuss its performance and limitation. Lastly, as an extension to the model, we study the optimal policies of expediting and regular ordering when there is an expiry date on outstanding orders. The optimal expediting policy identifies a number of base stock levels depending on the age of the orders, but the structure of the optimal policy remains simple for sequential systems. |
| Le, Tung H. | An inventory routing problem with perishable goods | Purdue University | 2009 | AAT 3378791 | Our research explores modeling issues, solution approaches and potential benefits for IRP models with perishable goods. The main contributions exist in four areas: (1) PIRP is formulated a large scale mixed integer problem. This model, to our best knowledge, is the first IRP model with perishable goods. (2) We introduce an innovative column generation approach which can obtain good solutions of PIRP within reasonable time. As a result of solving LP relaxation by column generation, we obtain the strong lower bound on the optimal solution of PIRP. (3) By studying the polyhedral structure of PIRP, we develop three families of valid inequalities for PIRP. The computational results showed that these valid inequalities are effective to strengthen PIRP. (4) We propose a Tabu search algorithm to solve large-scale PIRPs in which the search is done on routing binary variables and continuous variables, the quantities of goods delivered to customers, are determined through a linear programming problem. The computational results showed that the Tabu search algorithm can provide a good heuristic solution. |
| Lindsey, Matthew Douglas | Reliable prediction intervals and Bayesian estimation for demand rates of slow-moving inventory | University of North Texas | 2007 | AAT 3288271 | Inventory management tools are proposed that provide estimation procedures for the future demand rates of inventory with intermittent demand. Prediction intervals, adapted from statistical procedures developed for software reliability, for the future demand rate of a group of products that have no sales or no more than one sale over a specified time frame are proposed. A Monte Carlo simulation study is conducted to assess the reliability of these prediction intervals across various sizes of product groups and demand rates as well as for mixtures of demand rates and identify reliable parameter ranges. Sales data from a Fortune 500 company were used to assess the performance of the proposed prediction intervals. Two models--a Bayes model, using a prior probability distribution for the demand rate and a Poisson model, using a Poisson distribution for demand--were used to obtain optimal inventory levels over several periods assuming a known cost for surplus and shortage. This procedure has been proposed in the literature. However, its performance has not been examined under various demand rates such as intermittent demand. A Monte Carlo simulation study was used to examine the performance of the Bayes and Poisson model under moderate and intermittent demand. When the demand rates of the products are homogeneous, the inventory costs related to the Bayes model is lower than that of the Poisson model. The Poisson model is preferred under conditions of high variability among product demand rates. An improvement that optimized inventory costs for some demand rates was made to the Bayes model using a mixture of priors. |
| Liu, Jun | A stochastic inventory model with price quotation | University of Toronto  (Canada) | 2009 | AAT NR 59141 | This thesis studies a single item periodic review inventory management problem with stochastic demand, random price and quotation cost. An (r, S 1, S 2 ) policy with r < S 2 , S 1 ≤ S 2 is proposed for the problem with two prices. It prescribes that when the inventory is less than or equal to r , the price quotation is requested; if the higher price is quoted, then order up to S 1 , otherwise to S 2 . There are two cases, r < S 1 or S 1 ≤ r. In the first case, every time the price is quoted, an order is placed. It is a single reorder point two order-up-to levels policy that can be considered as an extension to the (s, S) policy of one reorder point, one order-up-to level. In the second case, S 1 ≤ r, it is possible to "request a quote but not buy" if the quoted price is not favorable when the inventory is between S 1 and r. Two total cost functions are derived for the cases r < S 1 ≤ S 2 and S 1 ≤ r < S 2 respectively. Then optimization algorithms are devised based on the properties of the cost functions and tested in numerical studies. The algorithms successfully find the optimal policies in all of the 135 test cases. Compared to the exhaustive search, the running time of the optimization algorithm is reduced significantly. The numerical study shows that the optimal ( r , S 1 , S 2 ) policy can save up to 50% by ordering up to different levels for different prices, compared to the optimal ( s , S ) policy taking quotation cost as order setup cost. It also reveals that in some cases it is optimal to search price speculatively, that is with S 1 < r , to request a quote but only place an order when the lower price is realized, when the inventory level is between S 1 and r. |
| Manikas, Andrew Steven | Essays in inventory decisions under uncertainty | Georgia Institute of Technology | 2008 | AAT 3308794 | In this research, we focus on the inventory decisions for companies with uncertain customer demands. We first investigate forward buying strategies for single stage inventory decisions. The situation is common in commodity industry where prices often fluctuate significantly from one purchasing opportunity to the next and demands are random. We propose a combined heuristic to determine the optimal number of future periods a firm should purchase at each ordering opportunity in order to maximize total expected profit when there is uncertainty in future demand and future buying price. Second, we study the complexities of bundling of products in an Assemble-To-Order (ATO) environment. We outline a salvage manipulator mechanism that coordinates the decentralized supply chain. Third, we extend our salvage manipulator mechanism to a two stage supply chain with a long cumulative lead time. With significant lead times, the assumption that the suppliers all see the same demand distribution as the retailer cannot be used. |
| Martinez, Oscar E. | Multiobjective coordination models for maintenance and service parts inventory planning and control | University of Central Florida | 2008 | AAT 3340996 | This research considers the aspect of joint maintenance and service part inventory optimization. We decompose the joint maintenance and service part inventory optimization problem into the supplier’s problem and the customer's problem. Long-run expected cost functions for each problem that include the most common maintenance cost parameters and service parts inventory cost parameters are presented. Computational experiments are conducted for a single-supplier two-echelon service parts supply chain configuration varying the number of customers in the network. Lateral transshipments (LTs) of service parts between customers are not allowed. For this configuration, we optimize the cost functions using a traditional, or decoupled, approach, where each supply chain entity optimizes its cost individually, and a joint approach, where the cost objectives of both the supplier and customers are optimized simultaneously. We show that the multiple objective optimization approach outperforms the traditional decoupled optimization approach by generating lower system-wide supply chain network costs. The model formulations are extended by relaxing the assumption of no LTs between customers in the supply chain network. Similar to those for the no LTs configuration, the results for the LTs configuration show that the multiobjective optimization outperforms the decoupled optimization in terms of system-wide cost. Hence, it is economically beneficial to jointly consider all parties within the supply network. Further, we compare the model configurations--LTs versus no LTs, and we show that using LTs improves the overall savings of the system. It is observed that the improvement is mostly derived from reduced shortage costs since the equipment downtime is reduced due to the proximity of the supply. |
| Metan, Gokhan | Robust and adaptive inventory management: Theory and algorithms | Lehigh University | 2008 | AAT 3314710 | We investigate robust and adaptive methodologies to address these issues. First, we analyze the value of information for two-stage inventory management in a robust optimization framework. We derive closed-form expressions for the optimal order quantities and provide insights into the impact of the cost parameters. We also compute the critical probability of the baseline scenario, for which the manager switches between pre-defined optimal strategies, and justify this behavior in the light of a risk-return tradeoff. Numerical experiments are very encouraging; performance improves by 10 to 50% when the manager considers three demand sub-regions rather than one and minimizes the worst-case cost. The second part of the thesis focuses on dynamic and data-driven algorithms, which incorporate information revealed over time without requiring the decision-maker to estimate the underlying distribution. Our first algorithm is devised for general non-stationary demand processes; its goal is to adjust dynamically the sample size. Our second algorithm is tailored to cyclical demand distributions and studies clustering mechanisms to identify the past demand points, among the historical data set, that are relevant to compute the optimal order at the next time period. The third algorithm investigates the use of range forecasts for the demand in addition to data-driven techniques in the case of the newsvendor problem. The motivation for this last approach is that historical data under-represent rare events, which are precisely the instances a risk-averse decision-maker wants to protect his revenue against. |
| Myers, Bret Rothschild | Analysis of an inventory system with product perishability and substitution: A simulation-optimization approach | Drexel University | 2009 | AAT 3374737 | This thesis focuses on some inventory management policies for substitutable and perishable items under demand uncertainty. A set of perishable products with fixed shelf lives is considered under an ( *R,S i* ) system of inventory control where demand for a preferred product can be satisfied by a substitute product with a known probability, in the event of a stock out of the preferred product. While taking demand substitution and product expiration into account, the retailer is faced with the decision of determining the order-up-to level, *S i* , for each product *i* which maximizes expected total profit, given a common review period, R, determined exogenously. Under demand uncertainty, the problem detailed in this thesis involves stochastic optimization. An exact closed form expression, however, for expected profits becomes difficult for certain parameter values involving product shelf-life, product substitution, and lead time. As an alternative approach, order replenishment, demand consumption, substitution, and product expiration can be effectively modeled using discrete-event simulation. Through a discrete-event simulation model, each realization of the profit function can be evaluated for a selected value of *S i* , and a mean profit value can be estimated after a number of replications of a simulation run. In order to find the best *S i* solution, the technique of simulation-optimization is used. |
| Olivares Acuna, Marcelo Osvaldo | Econometric analysis of inventory and capacity management | University of Pennsylvania | 2007 | AAT 3271795 | This dissertation is composed of three essays. The first essay develops a methodology to estimate the underlying costs of a Newsvendor model based on actual decisions. We present a structural estimation framework that captures the effect of uncertainty and mismatch costs on the decisions made by the newsvendor. This econometric model is applied to a hospital that balances the costs of reserving too much vs. too little operating room capacity. The results reveal that the hospital places more emphasis on the tangible costs of having idle capacity than on the costs of schedule overrun. Over-confidence and incentive conflicts are important drivers of the frequency of schedule overruns. The second and third essays analyze finished-goods inventory holdings in the U.S. automobile industry. The second essay uses panel data to measure the effect of several factors on aggregate inventory holdings of new vehicles. Four of these factors--product variety, demand variability, production flexibility and sales volume--explain a large fraction of the differences in inventory across manufacturers. The third essay estimates the effect of local market conditions on inventory holdings of automobile dealerships. We collected (via a web-crawler) an original dataset on inventory and sales of auto dealerships of a large manufacturer. Using cross-sectional variation of dealers in geographically isolated markets, we estimate the effect of market structure (number and type of competitors) and sales on inventory levels. The results suggest a strong positive non-linear effect of the number of rivals on the buffer stock carried by retailers, which increases inventory. Counterfactual experiments indicate that reducing the dealership network of this manufacturer (thereby reducing competition) could reduce the remaining dealers’ days-of-supply from 14% to 27%. |
| Ormeci, Melda | Inventory control in a build-to-order environment | Georgia Institute of Technology | 2006 | AAT 3233573 | This dissertation addresses inventory control in a build-to-order environment. It consists of three independent sections: challenges of managing supply in the auto industry from a build-to-order (BTO) perspective and some solution approaches, a stochastic control problem dealing with managing supply, and exploring Lagrangian methods in stochastic models. In the first part, focusing on the auto industry we look at the challenges and solution strategies of employing BTO with global supply. In the second part we look at a stochastic control problem, which also provides theoretical evidence in support of the Ship-to-Average policies. In the final part of the thesis we further study the Lagrangian approach developed in the second part. We explore the power and applicability in more details, demonstrate specific technical characteristics and describe additional applications. In this process, we look at several Brownian control problems with different forms of constraints. We solve these constrained Brownian control problems using Lagrange methods and note that the modeling aspect plays a critical role in the solution. |
| Ortiz, Olga L. | Stochastic inventory control with partial demand observability | Georgia Institute of Technology | 2008 | AAT 3308804 | This dissertation focuses on issues associated with the value of information in models of sequential decision making under uncertainty. First, we study the effect of the accuracy of inventory counts on system performance when using a zero-memory controller in an inventory system that is modeled as a partially observed Markov decision process (POMDP). Second, we assess the value of demand observation quality in an inventory system with Markovian demand and lost sales. We then extend our results to consider the effects that product substitution has on system performance. We show that systems with low demand variability, high holding cost levels, and high levels of substitution benefit more from demand observability than systems with high demand variability, low holding cost levels, and low levels of substitution. Third, to enhance our understanding of sequential inventory control with substitutable products, we analyze a two-item inventory problem with known deterministic primary demand, but stochastic one-way substitution. We model this problem as a MDP and show that a decision rule that minimizes the single period cost function, when applied at every decision epoch over the infinite horizon, is an optimal policy for the infinite horizon problem. A definition of increased substitutability is presented, and it is shown that increased substitutability never increases optimal expected total discounted cost. |
| Pakiding, Fitryanti | Improved inventory control strategies for farm supply cooperatives | Oklahoma State University | 2007 | AAT 3259608 | This research examines farm supply cooperative inventory management performance and to identify improved inventory control strategies. The data were obtained from an inventory data of a farm supply cooperative in Oklahoma from March 2004 to February 2006. To examine the inventory performance of the cooperative, the Inventory Turnover Ratio (ITR) and Inventory Management Index (IMI) were employed. The improved inventory control strategies related to these three activities were developed in this study. A strategy called “proper inventory mix” was implemented to the sale activity; a strategy based on economic order quantity was applied to improve the purchasing activity; lastly the centralization storage model was applied in making a better decision in transferring items between branches activities. The inventory performance of each group of items found to be varied significantly within the group and among the groups of items. The finding indicates that the cooperative needs to improve its inventory turnover as well as its gross margin. The improved sales strategy was found to significantly increase the performance of some groups of items. The improved purchasing strategy was found to significantly reduce the ordering costs and the holding costs. The stocking locations strategy was found to reduce the total distance to transfer the items, hence decrease the transportation cost. Despite of all the improvement in inventory performance due to the implementation of improved inventory control strategies developed in this study, it can be concluded that there is no single “ideal” inventory control system that can be applied to every item. |
| Rangarajan, Atul | Newsvendor inventory decisions under risk: Analytical and evolutionary agent models | The Pennsylvania State University | 2007 | AAT 3393799 | This thesis deals with inventory management under risk in the newsvendor model while incorporating the decision maker’s risk preferences. The newsvendor is modeled as being risk-averse, risk- neutral or risk-seeking, collectively referred to as the risk aware newsvendor. The first model looks at a risk aware newsvendor who sells a single product over a single selling season. We consider the associated expected utility maximization problem to find the optimal order quantity. We also investigate a common assumption on the existence of an interior point solution to the expected utility maximization problem. We provide intuitive arguments on why (and when) the assumption is reasonable. Using Monte-Carlo simulation, we obtain the distribution of expected utility for a newsvendor with a power utility function considering both risk averse and risk seeking preferences. An analysis of these distributions using stochastic dominance results is also performed. Finally, we study the effect of incorporating supply disruption risk in addition to the demand risk faced by the newsvendor. The newsvendor assures capacity at the supplier by reserving it at some cost. Orders are placed with the supplier and arrive, in full, if no disruption in supply occurs (or not at all otherwise). Assuming a Power utility function for the newsvendor, we provide closed form solutions for all risk preferences for the optimal order quantity. The effect of supply disruptions in the evolutionary agent model is investigated. |
| Roumiantsev, Serguei | New insights into inventory dynamics and its financial implications: Evidence for United States and international public companies | University of Pennsylvania | 2006 | AAT 3225534 | Classical inventory models offer a variety of insights into the optimal way to manage inventories of individual products. Can insights from these models be used to explain the inventory dynamics of entire companies? Can one also judge on the quality of company operations using only public data? The goal of this dissertation is to address those issues using empirical data and investigate it in details for a variety of industries and countries. We start in the second chapter with analyzing absolute and relative inventories using a quarterly data panel and find empirical evidence that firms operating with more uncertain demand, longer lead times and higher margins have higher inventory levels. Our results demonstrate that classical inventory models can help with high-level strategic choices in addition to tactical decisions. Next, in the Chapter 3, we show that superior earnings are associated with the speed of change/responsiveness in inventory management, after controlling for industry- and firm-specific effects. In the final step, in the Chapter 4 we empirically study inventory dynamics for a large sample of publicly held companies from OECD nine countries. Depending on the country, our model explains between 76% and 95% of the variation in the absolute inventory and we show that raw materials inventory is the cash cycle component that has the highest negative significant association with accounting performance. |
| Salzarulo, Peter A. | Vendor managed inventory programs and their effect on supply chain performance | Indiana University | 2006 | AAT 3229585 | Vendor Managed Inventory (VMI) programs are one popular method of placing a supply chain under centralized control. Under VMI, the customer supplies the vendor with inventory information and the vendor uses this information to manage the customer's inventory. In this respect, the customer authorizes the vendor to make all inventory replenishment decisions. This dissertation investigates how VMI enhances a manufacturer's production timing and results in improved levels of service and inventory. In the first study, we compare three replenishment strategies in a two-echelon serial supply chain. These strategies include Make-to-Order, Make-to-Stock, and Vendor Managed Inventory. To compare these strategies, we develop several probability models that we use to calculate the expected fill rate, average customer inventory, and average manufacturer inventory. The second study determines the benefit of VMI in a two-echelon arbores cent supply chain. Assuming that each customer orders a unique product, most of VMI derives much of its benefit from improved production timing. To this end, three reordering policies are investigated, including echelon and installation stock policies. In addition, we propose a heuristic policy which calculates a power function of the customers' inventory positions and initiates production once the result of this function reaches a threshold value. Numerical analysis is used in both studies to determine the impact of several key environmental variables. |
| Sawaya, William James | The performance impact of the extent of inter-organizational information sharing: An investigation using a complex adaptive system paradigm and agent-based simulation | University of Minnesota | 2006 | AAT 3227585 | To capture the complexity of a supply networks’ relationships and interactions, methods such as agent-based simulation can provide a rich representation of complex supply networks systems. This is accomplished by explicitly modeling the individual organizations and the ways in which they interact and react to each other, which might otherwise be abstracted away. This research is unique in that it explores information sharing both up and down the supply network. Specifically, information passed from the customer to the supplier in the form of POS data, as well as information passed from the supplier to its customers, in the form of lead-time estimates. It is among the first such studies to explicitly consider information sharing of both types simultaneously. Demand point-of-sale data is found to be generally beneficial to the manufacturer and be, at least, not worse for their customers in a setting with significantly more variability of demand than is generally considered in most studies and with stochastic transportation times. But shared information does not benefit all organizations alike. Shared lead-time information is often beneficial to the distribution centers particularly when lead-time variance is high and when demand volumes are high, but can cause the manufacturer to carry more inventory. |
| Schmitt, Amanda J. | Strategic inventory management for supply chains subject to supply uncertainty | Lehigh University | 2008 | AAT 3316903 | We focus on how supply uncertainty affects not only the optimal settings for inventory levels, but also how it can impact the strategic choices made for inventory system design. In our first topic, we model a supplier who is subject to yield uncertainty as well as complete disruptions. We demonstrate the importance of using multiple-period models and accurately identifying and segregating uncertainty sources by comparing the exact model to two approximations which fail to do so. We demonstrate that these approximations fail to provide full backup inventory quantities even when it is optimal to do so. Our second topic addresses supply disruptions for a single retailer and develops tools for inventory analysis of such systems. We show how discrete-event uncertainty and continuous sources of uncertainty have differing impacts on optimal inventory settings. We develop a closed-form approximate solution for the system by focusing on a Single Stochastic Period (SSP) of demand or yield. Finally, we expand to multi-echelon analysis and model the One-Warehouse Multiple-Retailer system with supply uncertainty. We combine demand uncertainty and supply disruptions and study the balance between risk pooling and risk diversification. We show that when risk-averse objectives are employed, the decentralized system is frequently the optimal choice in order to protect against cost risk due to supply disruptions. |
| Seijo, Roberto Luis | Modified (Q, r) inventory control policy for an assemble-to-order environment | Texas A&M University | 2009 | AAT 3884320 | The main objective of this research is to develop a modified (*Q, r*) policy that incorporates the safety time, and to evaluate this policy in terms of expected inventory cost and expected penalty cost / late orders. The problem is addressed following the heuristic approach discussed by Hadley and Whitin (1963). Two main models are developed based on the following assumptions: (1) early shipments are allowed by the customer, and (2) no early shipments are allowed. The behavior of both models is analyzed mathematically and by means of numerical examples. It is shown that from a manufacturer perspective, the first model is preferred over the traditional (*Q, r*) model. However, it poses a threat for the long term business relationship with the customer because the service level deteriorates, and for the implications that early shipments have on the customer inventory. The behavior of the second model is strictly related to the problem being addressed. Its merits with respect to the traditional and the "early shipment" model are discussed. This discussion is centered on the coefficient of variation of the lead-time demand, the ratio (*IC* /π), and the location of the supplier. A final model which is a hybrid of the previous two shipping policies is developed. The models developed in the course of this research are generalizations of the traditional (*Q, r*) model. |
| Sellamuthu, Sivakumar | An effective implementation of operational inventory management | Texas A&M University | 2009 | AAT 3370800 | This Record of Study describes the Doctor of Engineering (DE) internship experience at the Supply Chain Systems Laboratory (SCSL) at Texas A&M University. The objective of the internship was to design and develop automation tools to streamline lab operations related to inventory managementprojects and during that process adapt and/or extend theoretical inventory models according to real-world business complexity and data integrity problems. A holistic approach to automation was taken to satisfy both short-term and long-term needs subject to organizational constraints. A comprehensive software productivity tool was designed and developed that considerably reduced time and effort spent on non-value adding activities. This resulted in standardizing and streamlining data analysis related activities. Real-world factors that significantly influence the data analysis process were identified and incorporated into model specifications. This helped develop an operational inventory managementmodel that accounted for business complexity and data integrity issues commonly encountered during implementation. Many organizational issues including new business strategies, human resources, administration, and project managementwere also addressed during the course of the internship. |
| Singh, Praneet Narayan | Essays on product assortment, inventory and pricing decisions in supply chains | University of Rochester | 2007 | AAT 3263996 | This dissertation is a collection of three essays on retail inventory management under discrete consumer choice. We apply analytical models that incorporate joint product assortment, inventory, and pricing decisions in a two-stage supply chain to examine how structural issues and interactions between entities affect the optimal level of product assortment that is offered to customers. In the first essay, we compare product assortment and stocking decisions in seven supply chain structures, and delineate the critical influence of the structure of a supply chain on the size of the optimal assortment. We demonstrate that in most practical situations, single or dual stage fulfillment supply chains that employ a virtual fulfillment mechanism will offer a larger product assortment than supply chains that do not do so. The second essay studies a price-only contract between an upstream wholesaler and a downstream retailer in a segment of the supply chain, where the wholesaler makes the pricing decision and the retailer makes the quantity and product assortment decisions. We show that the double marginalization and the consequent lack of coordination in the supply chain manifests as lower product variety that the retailer offers to his customers. Finally, we study simple formulations of five coordinating contracts and discuss the relative cost of administering these contracts in a multi-product setup. We conclude in the third essay by applying non-analytical approaches to examine the effect of some key factors on assortment planning. These include the customer preference structure, retail price dependent utility function, correlation of retailer demands and stock-out based substitution. |
| Srinivasan, Mahesh | Optimal and approximate policies for periodic review inventory systems: The case of order crossover and multiple supply options | The Pennsylvania State University | 2007 | AAT 3393813 | This dissertation investigates optimal and approximate policies and comparing the cost performance of these policies to other sub-optimal order up-to form of base-stock policies. First we consider a model with a single supply source/option and formulate the order crossover problem as a Markov Decision Process and investigate the optimal policy. We show that considering order crossover in setting the inventory policy results in a potential reduction in inventory levels and inventory costs due to a lowering of the order-up-to level, if the inventory policy is an order-up-to-level form of policy. We also propose approximate policies and demonstrate through simulation that these policies perform substantially better than, or at least perform as well as, the sub-optimal “order-up-to” base-stock form of policies and are easier to compute and implement as compared to the optimal policy. Further, we extend the order crossover problem to include two supply sources/ options having stochastic supply lead times. We investigate the optimal and near-optimal inventory policies under such scenarios and compute the performance of these policies under various demand lead-time distributions. Through numerical experiments, we show that for a vast majority of problem instances, not considering the use of the fast supply option can result in sub-optimal policies and significant additional costs as high as 21-23 percent, even when the cost of using the fast supply option is ten times more than the cost of using the slow supply option. Even when the cost of using the fast supply option is substantially higher, (twenty times more expensive), a significant portion of the orders are placed using this option, especially when stock-out costs are high. |
| Sui, Zheng | Simulation-based meta-optimization in vendor managed inventory systems | State University of New York at Buffalo | 2007 | AAT 3277767 | Although the VMI philosophy has been embraced in a number of industries, there are few research works that attempt to develop analytical models for it because of the complexity in modeling. Simulation has been used to model VMI systems in the literature, but none of the existing works seek optimal inventory policies. Hence, a methodology based on simulation optimization has been developed here to obtain the optimal inventory policies in VMI systems. The solution methodology for the simulation model is based on two paradigms: a dynamic slave paradigm, which optimizes the inventory replenishment policy for the retailers, and a static master paradigm, which optimizes the inventory replenishment policy for the distribution center (DC). The slave problem is modeled as a semi-Markov decision problem. Approximate dynamic programming, also called reinforcement learning, is used to optimize the inventory replenishment policies for the retailers. For the master paradigm, a genetic algorithm is applied to optimize the (Q*, R*) policy for the inventory replenishment at the DC. Numerical examples are presented which show that the methodology based on reinforcement learning and genetic algorithms outperforms some well-known benchmarking algorithms. |
| Tajbakhsh, Mohammad Mahdi | Inventory managementand sourcing decisions in the presence of upstream uncertainty | University of Toronto (Canada) | 2007 | AAT NR39576 | The thesis combines inventory management and sourcing decisions in the presence of either price or yield uncertainty. First, we consider a continuous review inventory model in which suppliers make deal offers with random discount prices at random points in time. We propose an (R, s , Q 1 , Q 2 , ..., Q) policy under which an amount R is ordered when the inventory level hits zero, a discount offer is rejected if the inventory on hand is more than s, and the inventory level is raised to a target s + Q i when a discount offer at price c i (i = 1, 2, ..., n ) is accepted. Numerical examples are presented to demonstrate cost savings due to discount offers as well as to shed light on the managerial insights in the problem of optimal supplier selection. Second, we develop two EOQ-based inventory models in which an inventory manager must determine the order size as well as the supply reliability level in the presence of uncertainty in the quality and/or quantity of supply. The number of acceptable units in the order is captured by the binomial yield model, and an improvement in reliability increases both the order setup cost and the unit price. For each model, we present an equation of which a solution is the optimal reliability level and a closed-form solution for the optimal order size given the optimal reliability level. We then compare the two models with regard to their reliability levels. Furthermore, these two models are extended to multiple-supplier cases where the suppliers’ order quantities are to be optimized. Using each model, we then address the supplier selection problem and conclude that multiple sourcing is never optimal. This is contrary to the literature advocating diversification in supply base in the presence of uncertainty. |
| Varghese, Vijith | Forecasting intermittent demand in large scale inventory system | University of Arkansas | 2009 | AAT 3374242 | The goal of this research is to improve demand forecasting and inventory control in large scale inventory systems with intermittent demands. This is achieved by a four prong approach. One, this research developed an individual intermittent demand forecasting technique named MCARTA with performance better than that of other relevant intermittent demand forecasting techniques and robust across hard to forecast demand scenarios. Two, a new metric to measure the performance of a forecasting technique within the context of an inventory system, named the FLTDD divergence metric is developed via the lead time demand distribution. Third, this research identified error measures with which behavior of operational performance measures can be predicted. Based on these two applications the effect of forecasting techniques in an inventory system can be evaluated. Finally, this research developed a meta-forecaster by applying supervised statistical learning, with which the selection of the best forecasting techniques for an item can be made efficient in a large scale inventory system. |
| Wallin, Cynthia J. | Inventory ownership and placement decisions for an externally sourced item within a buyer-supplier dyad | Arizona State University | 2006 | AAT 3220781 | This dissertation attempted to fill a gap in the literature by seeking to understand inventory ownership and inventory placement decisions for an externally sourced item in the buyer-supplier dyad. A set of propositions were developed relating the transaction specific attributes of asset specificity, uncertainty, and frequency to the two decisions of inventory ownership and inventory placement for a single externally-sourced item. Empirical data to test the conceptual framework were collected by means of a passive role-playing experiment in which subjects were asked to make inventory ownership and placement decisions for a particular externally sourced item in a given business scenario. The resulting stated preference data were then analyzed via several statistical tools, including contingency table analysis, binary logistic regression, non-parametric chi-square tests, and multicategory logistic regression to evaluate the theoretically derived propositions. Results of the analysis indicate moderate support for the predictive ability of two of the transaction attributes, asset specificity and uncertainty, and weak support for the third transaction attribute, frequency, as predictors of inventory ownership, inventory placement and the overall inventory managementapproach choice. The model was robust in predicting the placement of inventory in the buyer-supplier dyad, but an unexpected bias was exhibited by the subjects toward choosing the supplier, rather than the buyer, for inventory ownership. |
| Wu, Owen Qun | Production-inventory systems: Optimal control and empirical analysis | The University of British Columbia (Canada) | 2006 | AAT NR20021 | This thesis consists of three independent essays in the area of production and inventory management. The first essay is concerned with a competitive equilibrium production-inventory model with application to the petroleum refining industry. We show that, the optimal control is of a threshold type. Next, we consider an economy with many raw material suppliers, production firms and consumers. Both the supply and the demand are uncertain and price-sensitive. We establish and characterize the rational expectations equilibrium price process for this economy, and further derive the equilibrium in an explicit form for a special economy. Finally, we simulate the equilibrium model to reproduce some stylized facts of the petroleum refining industry and fit the model with actual data. The second essay studies an inventory system that supplies price-sensitive demand modeled by Brownian motion. The optimal pricing and inventory replenishment decisions under both long-run average and discounted objectives are derived, and related to or contrasted with previously known results. In addition, we emphasize the interplay between pricing and replenishment decisions, and the ways in which they react to the demand uncertainty. We show that the joint optimization of both decisions may result in significant profit improvement compared to the traditional method of making decisions separately or sequentially. We also show that multiple price changes result in only a limited profit improvement over the optimal single price. In the third essay, we examine the inventories of publicly traded American manufacturing companies between 1981 and 2000. The median of inventory holding periods were reduced from 96 days to 81 days. The average rate of inventory reduction is about 2% per year. The greatest reduction was found for work-in-process inventory, which declined by about 6% per year. Finished-goods inventories did not decline. Inventory holdings significantly affect firms’ long-term stock returns. Firms with abnormally high inventories have abnormally poor long-term stock returns. Firms with slightly lower than average inventories have good stock returns, but firms with the lowest inventories have only ordinary returns. |
| Yang, Xiaolou | Essays in financial propagation and corporate inventory investment behavior | The University of Texas at Austin | 2006 | AAT 3246099 | The three chapters comprising this Ph.D. dissertation focus on how financial propagation affects firms’ inventory investment dynamics. These studies will enrich the current literature on inventory behavior and macroeconomic activities. In the first chapter, I investigate the role of financial frictions on corporate inventory investment dynamics. I develop a tractable linearized version of equation based on a firm’s optimization problem which describes the joint evolution of inventory investment and financial variables. The empirical results support the significance of financial frictions for firms’ inventory investment behavior. In the second chapter, I incorporate both trade credit and bank loans into the traditional production smoothing inventory model. I find that the use of trade credit can significantly mitigates financial stress and helps firms overcome liquidity shortages. This finding illustrates a channel to dampen the impact of contractionary monetary policy and make the consequent reduction of the inventory investment less severe. Moreover, this study provides evidence showing that trade credit and bank loans are not perfect substitutes. In the last chapter, I present a decision-making process that incorporates a Genetic Algorithm (GA) into a state dependent dynamic portfolio optimization system. A GA solves the model by forward-looking and backward-induction, which incorporates both historical information and future uncertainty when estimating the asset returns. It significantly improves the accuracy of expected return estimation and thus improves the overall portfolio efficiency over the classical mean-variance method. |
| Yu, Yimin | Essays in operations and inventory management | University of Minnesota | 2009 | AAT 3371927 | This thesis consists of two essays. The first essay is on capacity pooling and cost sharing among independent firms in the presence of congestion. We analyze the benefit of production/service capacity sharing for a set of independent firms. We show how a cost allocation rule can be designed to induce all firms to report truthfully this information. Moreover, we show that, under this allocation rule, truth telling is a dominant strategy, with each firm reporting truthfully its private information regardless of the reporting decisions of other firms. The second essay is on a customer-item decomposition approach to inventory problems. We consider inventory systems with periodic review, correlated, non-stationary stochastic demand and correlated, non-stationary stochastic and sequential lead times. We treat systems with both single and multiple stages. We use the customer-item decomposition approach to decompose the associated inventory control problem into sub-problems, each involving a single customer-item pair. We then formulate each subproblem as an optimal stopping problem. We use properties that arise from this formulation to show that the optimal policy is a state-dependent base-stock policy and to show, for the case of positive demand, that the optimal policy can be obtained via an algorithm whose complexity is polynomial in the length of the planning horizon. We also use the formulation to construct myopic heuristics which lead to explicit solutions for the optimal policy in the form of a critical fractile. We characterize conditions under which the myopic heuristics are optimal. We show how the results can be extended to systems with advance demand information and batch ordering. |
| Zahrn, Frederick Craig | Studies of inventory control and capacity planning with multiple sources | Georgia Institute of Technology | 2009 | AAT 3376373 | This dissertation consists of two self-contained studies. The first study, in the domain of stochastic inventory theory, addresses the structure of optimal ordering policies in a periodic review setting. Our main contribution is a proof of the optimality of a finite generalized base stock policy under an average cost criterion. The second study is in the area of capacity planning. We propose a two-stage stochastic linear programming model with fixed recourse. We present an algorithm that efficiently generates a “definitive” collection of bases of the recourse program, facilitating rapid computation of the expected cost of a prospective fleet and its gradient. The equivalent convex program may then be solved by a standard gradient projection algorithm. The two investigations making up this dissertation are united by a concern with multiple sources within their respective contexts. The first study posits multiple sources of a single product (for example, multiple suppliers or production technologies) within an inventory control context. The second study considers multiple sources of transportation capacity, in the form of vehicles of differing sizes and the alternative of fleet versus spot capacity. For each of the two investigations, our focus on multiple sources entails a richer analysis than that arising from a single-source setting. |
| Zhang, Huiju | Three essays on stochastic optimization applied in financial engineering andinventory management | University of Maryland, College Park | 2007 | AAT 3260321 | This dissertation includes three essays on applying stochastic optimization methods to solve problems in inventory managementand financial engineering. Essay one addresses the problem of simultaneous price determination and inventory management. Numerical results for several optimization examples via different stochastic algorithms are presented, and consistency proofs for the estimators are provided. Essay two considers the application of stochastic optimization methods to American-style option pricing. Numerical results are provided for pricing American-style call and put options written on underlying assets following geometric Brownian motion and Merton jump-diffusion processes. We also price American-style Asian options written on underlying assets following geometric Brownian motion. The results from the Model Reference Adaptive Search (MRAS) algorithm are compared with the cross-entropy (CE) method, and MRAS is found to be an efficient method. Essay three addresses the problem of finding the optimal importance sampling measure when simulating portfolios of credit risky assets. We apply a gradient-based stochastic approximation method to find the parameters in the minimum variance problem when importance sampling is used. The gradient estimator is obtained under the original measure. We also employ the CE method to solve the same variance minimization problem. Numerical results illustrating the variance reduction are presented for the estimation of the portfolios’ expected loss, unexpected loss and quantiles. |
| Zhang, Jian | Vendor-managed inventory and information sharing along the supply chain | Arizona State University | 2005 | AAT 3178283 | The purpose of this dissertation is to examine the factors associated with vendor-managed-inventory (VMI) and information sharing practice along the supply chain and to evaluate the related performance effects. The empirical tests are conducted using cross-sectional survey data collected by Industry Week’s 1999 value chain survey. The results indicate that firms’ decisions of VMI adoption are consistent with the predictions of transaction cost theory. Specifically, when compared with firms that do not invest in VMI, those that do invest are larger and involved in more transaction specific investment. Robustness analyses indicate that firms are more likely to implement VMI with trading partners that have complementary resources. Second, on overall basis, both suppliers and customers of VMI practice improve on operational efficiency and service level performance. The results also indicate that firms engage in sharing sales forecast information with suppliers are more likely to have “build to forecast” as their order fulfillment practice, to use Just-In-Time (JIT) practice with their suppliers, to deal with a fewer number of customers and to have a declining number of suppliers as compared with firms not engaged in sharing sales forecast information. Similarly, firms that engage in sharing operational information with customers are more likely to have JIT practice with their customers and have a fewer number of customers. Second, regarding the perceived benefits of information sharing, firms that share both sales forecast information with suppliers and operational information with customers are more likely to have a better integrated and coordinated supply chain and to report greater perceived benefit from information sharing. |
| Zhou, Bin | On optimal pricing and ordering in supply chain management | Rutgers The State University of New Jersey, Newark | 2007 | AAT 3280411 | The dissertation consists of three essays, in which the first essay studies a dynamic pricing and revenue management model, and the last two essays explore inventory management problems with minimum order quantity (MOQ) and minimum free shipping (MFS) option, respectively. In the first essay, we study a new dynamic pricing/production model in which a product is produced and sold over an infinite cyclic horizon. In the second essay, we consider a retailer who operates a single-product, periodic-review inventory system in an infinite time horizon. We study and propose a heuristic policy of simple structure, namely the (*s,t*) policy. We demonstrate that the (*s,t*) policy has close-to-optimal performance under reasonable conditions, and it constantly and significantly outperforms the (*s,S* ) policies that are currently used in practice. In the third essay, we study the problem of stochastic inventory systems with free shipping option. In particular, we consider a periodic-review inventory model in which the ordering cost is a linear function of the ordering quantity, and the shipping cost is a fixed constant *K*, whenever the order size is less than a given quantity of the minimum free shipping (MFS) quantity, and it is zero whenever the order size is equal to or greater than the MFS quantity. Demands in different time periods are independent random variables. We present the optimal inventory control policy and characterize its structural properties for the model in single period. For the multiple-period case, we propose a heuristic policy that has a simple structure. In addition, we conduct numerical studies to gauge the effectiveness of the heuristic policy and provide managerial insights. |
| Zhou, Sean Xiang | Joint optimization in supply chain | North Carolina State University | 2006 | AAT 3249687 | In this dissertation, we study inventory management for both single-stage and multi-echelon systems. Two main streams of research work are summarized. The first is the joint optimization of pricing and inventory control for continuous/periodic review single-stage inventory/production systems. We characterize the optimal policies and further develop efficient computational algorithms to find the optimal control parameters. We also provide insights on the pricing and inventory relationship. The second is the analysis of multi-echelon inventory systems, in which we derive the optimal inventory control policies for several different systems that have not yet been studied in the current literature. Moreover, simple bounds and heuristics for the optimal policies are developed for the serial systems with and without expedited shipping so that the implementability of the optimal policies is improved. |

Code 12: Purchasing, Procurement, and Materials Management

| **Author** | **Title** | **Institution** | **Year** | **Number** | **Abstract** |
| --- | --- | --- | --- | --- | --- |
| Anker, Ashley E. | Difficult communication: Compliance-gaining strategies of organ procurementcoordinators | State University of New York at Buffalo | 2009 | AAT 3356008 | This study addresses the less-than-optimal consent rates by interviewing organ procurement coordinators (OPCs) - the individuals responsible for obtaining familial consent for donation - about the communication strategies utilized in the request process. Seventy-nine interviews were conducted with OPCs from a national sample of 11 organ procurementorganizations [OPOs] (19% of OPOs). Results describe the strategies utilized by OPCs in attempting to gain credibility with a potential donor family, barriers to donation, messages utilized in requesting donation from families, factors relevant to the timing and setting of the donation request, and familial factors that may change the donation request process. Results identify positive associations between conversion rates and attending workshops/conferences (β = 0.25), describing additional roles to the family (β = 0.25), gaining early intervention (β = 0.34), and approaching a family with additional support (β = 0.34). In addition, negative associations are noted between engaging in role play activities (β = -0.40), discussing donation as life-saving (β = -0.27), asking about a patient's character (β = -0.24), and approaching away from bedside (β = -0.26) and conversion rates. Recommendations are offered for the applicability of this research to those involved with facilitating the organ procurementprocess surrounding cadaveric donation, as well as to communication scholars. |
| Canbolat, Yavuz Burak | Multiple perspective models of manufacturer-supplier risk | Wayne State University | 2005 | AAT 3196196 | In this dissertation, we study this complex, dynamic, risky supply chain environment from both an Original Equipment Manufacturer (OEM) and a supplier perspective. We first explore global sourcing risks from an OEM's point of view and develop models to analyze and manage risk. We then study the impact of long-term relations between a supplier and OEM on bidding decisions and develop sequential bidding models. We develop an emerging market sourcing risk analysis and management model for a global automotive company to support its global sourcing decisions. We use simulation to analyze risk and evaluate risk mitigation plans. The model not only helps decision makers assess risk, it also guides them in developing risk mitigation plans. We define a number of sourcing risk management strategies and then use optimization to find an optimal portfolio of the risk management plans by reflecting the decision maker's risk attitude. The model has been verified and validated through the real world case studies. We also develop models of sequential bidding on product design and manufacture for a tier one supplier. The initial contract and its successful implementation impact the organizational relationship between the supplier and the buyer which directly affects pricing, profit margins, and the probability of winning a subsequent contract. We examine the sequential bidding problems for finite and infinite time horizons. We use backward dynamic programming to derive optimum bid prices for finite time horizon models. Infinite time horizon models relaxed some of the assumptions we made to derive analytical solution for finite time horizon bidding models. We use Markov Decision Process to derive the optimum bidding strategy for each state. |
| Cole, Mia | A critical assessment of professional skills and knowledge in supplier diversity: A Delphi study | Antioch University, Ohio | 2008 | AAT 3332192 | Today, many US corporations have made great strides to embrace supplier diversity as a social consideration, and most importantly, as a strategic business enabler. From the earlier years of mandating minority inclusion to the realization that diversifying the supply chain creates value by capitalizing on the diverse background and experiences of minority businesses, supplier diversity has emerged as a major business initiative. It is one of the initiatives that contribute to the welfare of the country by building minority communities and strengthening our society. By developing business coalitions and partnerships with minority suppliers there is tremendous opportunity to impact the economic development of minorities and make significant contributions to the growth and development of our nation. The goal of this research is to apply the Delphi methodology to a research study that identifies the skills and knowledge that marks a professional in supplier diversity in the private sector. Additionally, this study is intended to help shape the future of supplier diversity as a professional entity in the business environment. This research is honoring and advancing the cause and status of supplier diversity professionals who possess the drive and commitment to elevate supplier diversity to a profession. |
| Farahvash, Pooya | Analysis of inventory systems with auction type procurements | Rutgers the State University of New Jersey, New Brunswick | 2007 | AAT 3252988 | Application of the auction mechanism as a procurement tool introduces improvement opportunities in the area of supply chain management. Incorporation of the procurement auction in inventory modeling techniques, on the other hand, leads to challenges in evaluation of the material flow decision variables. This study is aimed to provide a method to incorporate the auction mechanism into inventory management. This research consists of two major topics and we employed different approaches to integrate the reverse auction into the inventory theory in each case. In the first scenario, we study continuous-review inventory models, with both deterministic and stochastic characteristics and when the bids are single-dimensional. The second scenario involves the case where the issued bids are multi-dimensional. This type of reverse auction is integrated into a single-period inventory model. This model later is extended into a multi-period one by using the stochastic dynamic programming method. The methodology introduced here would have potential applications in supply chain management and manufacturing resource planning. |
| Ghanbari, Abdolhamid | Model-based integrated total project management systems, with an emphasis on materials management | The University of British Columbia (Canada) | 2006 | AAT NR 19981 | This dissertation investigates how among architecture, engineering, construction, and facility management (AEC/FM) product and process information could be integrated into a unified AEC/IFM project model that could support a wide range of construction project management (PM) functions, with an emphasis on materials management (MM). This was done through a coupling of top-down analytical activities and bottom-up activities. The bottom-up investigations, which were critical in informing, providing the research criteria, and validating the models produced in the top-down activities, include a review of current project and construction management software applications, software prototyping, field data-and-process analyses, and a Process Modeling Practice Workshop. This dissertation includes a comprehensive, critical literature review and a description of the research activities and deliverables. The primary research deliverables presented are: (1) a conceptual AEC/IFM Project Core Model (APCM), (2) a Conceptual PM Functions Framework (CPMF) for classifying PM functions, (3) a classification of PM/MM functions, (4) a model for the integration of AEC/IFM business and software system models, called the Integrated Total Project Management Systems (ITPMS) model, (5) an implementation of the ITPMS model in a CASE (Computer-Aided Software Engineering) tool, and (6) a set of MM domain object models and process models. A special emphasis is placed on the “modeling process” and derivation of information through business process modeling (i.e., explicit linkage of the two types of models) for a better model management. The proposed solutions collectively represent both a proof-of-concept and the means of realization of model-based integrated total PM systems. It is envisioned that they will be informing and will contribute to the CIC initiatives. |
| Hawkins, Timothy Glenn | Explaining buyer opportunism in business-to-business relationships | University of North Texas | 2007 | AAT 3276442 | Understanding why opportunism occurs will reveal how to deter it, and this remains a gap in the literature. Based on theories in economics, marketing channels, supply chain management, decision science, and psychology, a comprehensive model tested a set of factors hypothesized to drive the use of opportunistic tactics. Factors include buyer-supplier relationship-specific factors, environmental factors, individual personality-related factors, and situational factors. Data was collected via internet survey of sourcing professionals from private industry and government agencies. Common to many studies of ethics, respondents made choices based on two hypothetical vignettes. Two logistic regression models were used to test the hypotheses. Factors found to affect buyer opportunism included buyer power, corporate ethical values, pressure to perform, leadership opportunism, business sector, honesty/integrity, and subjective expected utility. This research contributes to theory by combining several disparate theories to best explain opportunism. A comprehensive evaluation should determine which theory explains the most variance in decision making. The study contributes to practice by identifying those important factors contributing to a sourcing professional’s decision to use opportunistic tactics. The ability to manage these factors should improve the probability of relationship success. Additionally, the identification of these factors should help leaders to make more accurate estimates of transaction costs - key knowledge required to make an informed make or buy governance decision. |
| Kayis, Enis | Essays on procurement contracting | Stanford University | 2009 | AAT 3343642 | In this dissertation, we are interested in the design of procurementcontracts as well as the best contracting structure in supply chains when there is uncertainty about the suppliers’ costs. In Chapter 2, we search for simple yet efficient procurementcontracts. We examine the tradeoff between simplicity and profitability of a procurement contract. Our results show that incremental quantity discount contracts, which are asymptotically optimal, can be highly efficient for the manufacturer. In Chapter 3, we study the impact of these two instruments on procurement: A manufacturer must choose to delegate component procurementto its tier-1 supplier, or to control component procurement by contracting with both the tier-1 supplier and the tier-2 component supplier. Both suppliers have private cost information and the manufacturer has an alternative source of supply with cost that may be known or unknown to the suppliers. A numerical study shows that over a wide range of conditions, if the manufacturer chooses delegation versus control correctly, then she achieves nearly as much expected profit with price-only contracts as with the complex optimal contracts. The efficiency of price-only contracts, however, is contingent on the manufacturer making the right decision to delegate or control component procurement*.* In Chapter 4, we extend our base model in the previous chapter to show that there are additional factors that also play a critical role in determining the best contracting structure in component procurement*:* correlation in suppliers' costs, the quality of tier-1 supplier's information about tier-2 supplier’s cost, and the existence of multiple tier-2 suppliers each with its own private cost information. |
| Kuyzu, Gultekin | Procurement in truckload transportation | Georgia Institute of Technology | 2007 | AAT 3261674 | In this thesis, we address a number of operational challenges encountered in two emerging types of practices in the procurement of truckload transportation services: collaboration and auctions. The first part of the thesis concerns the solution of optimization problems arising in collaborative transportation procurement networks where a group of shippers comes together and jointly negotiates with carriers for the procurement of transportation services. We discuss optimization technology that can be used to assist in the identification of repeatable, dedicated truckload continuous move tours with little truck repositioning. We demonstrate the effectiveness of the algorithms developed on various randomly generated instances as well as on instances derived from data obtained from a strategic sourcing consortium for a $14 billion dollar sized US industry. The second part of the thesis concerns the pricing of transportation services offered by the trucking companies (carriers). We look at the bid determination problem faced by carriers in transportation procurement auctions where a shipper requests quotes from the carriers and purchases the services of the lowest bidder. We model the problem as a stochastic optimization problem and propose a coordinate search algorithm for solving this problem. Then, we conduct a simulation study to demonstrate the positive impact of the approach on carrier profits. In both problems considered in the thesis, the central issue is identifying and exploiting synergies between the lanes of a carrier’s network. |
| Li, Wentao | An agent-based negotiation model for the sourcing of construction suppliers | University of Hong Kong (Hong Kong) | 2008 | AAT 0820983 | This thesis describes the work of design of an agent-based negotiation model for the sourcing of construction suppliers. In this study, a literature review was first carried out to investigate the existing tools in supplier selection as well as selection criteria adopted by decision makers in construction industry. Then based on the design of a new parallel bargaining protocol, a conceptual negotiation model is designed while thoroughly studying the characteristics and problems existing in the sourcing of construction suppliers. The Zeuthen’s concession strategy was adopted as the risk evaluation strategy in the negotiation model. Bayesian learning model has been integrated into the whole negotiation model to improve the efficiency. A prototype was built using JADE agent building toolkit based on Java. Finally the model is assessed using the prototype and Face validation to evaluate the quality of the designed model. Results of the assessment show that this model can improve the efficiency of the negotiation to reach the win-win goal, as well as it can significantly improve the transparency. Furthermore, the results have showed that this model can also be utilized in the multi-attribute decision problem in a distributed environment such as supply chain scheduling, concurrent engineering and so on. This study has also proved the importance of a comprehensive study of negotiation model for the construction supplier sourcing. |
| Ma, Zhong | Combinatorial auctions for truckload transportation procurement | University of Toronto (Canada) | 2008 | AAT NR57896 | The goal of this dissertation is to understand the market-based mechanisms that enable shippers to allocate lanes in an efficient way for truckload (TL) transportation procurement despite the self-interest of carriers. Our approach to gaining the understanding consists of three parts: 1. We develop a carrier optimal bid generation model for carriers (bidders) to discover the best sets of lanes to bid for at a given round. The optimal bid generation model simultaneously generates alternative tours and selects the most profitable package bid for the carrier under a myopic strategy, which has never been considered before. The simultaneous tour generation and selection significantly lessen the computational complexities of a carrier's optimization problem since it is unnecessary for the carrier to calculate the values for all possible packages. 2. We present an iterative combinatorial auction design that integrates the optimization problems for both the shipper and the bidders where the approximate dual prices derived from the result of a winner determination solution are used by the bidders in identifying profitable lanes. The auctions also allow the bidders to submit exclusive-OR (XOR) bids and are able to deal with some common business considerations. The extension of the concept of active bids enables this mechanism to effectively mitigate the exposure problem, the threshold problem, and the free-riding problem. Furthermore, both the shippers and the carriers are better off compared to multi-round auctions that do not integrate the shippers’ and carriers' optimizations. 3. We extend a deterministic winner determination model to a two-stage stochastic winner determination model for TL transportation procurement under shipment volume uncertainty. We demonstrate that the value of the stochastic solution is always at least as good as one obtained by a deterministic model based on using expected shipment volumes. The sWDP model is to the best of our knowledge the first winner determination formulation of any kind that explicitly incorporates demand uncertainty. |
| Mendoza, Abraham | Effective methodologies for supplier selection and order quantity allocation | The Pennsylvania State University | 2007 | AAT 3299026 | A well-selected set of suppliers makes a strategic difference to an organization’s ability to reduce costs and improve the quality of its end products. This realization drives the search for new and better ways to evaluate and select suppliers. First, this research presents a three-phase methodology that integrates the various steps of the supplier selection process. This helps decision makers reduce a base of potential suppliers to a manageable number and make the final selection and order quantity allocation by means of multi-criteria techniques, such as the ideal solution approach, analytical hierarchy process (AHP), and goal programming. Second, this research considers the importance of inventory management in determining the optimal order quantity from selected suppliers. Two mixed integer nonlinear programming models are proposed to obtain optimal inventory policies that simultaneously determine how much, how often, and from which suppliers to order. In the numerical example illustrated, the total cost per time unit obtained using the power function to estimate actual freight rates was only 1.4% greater than the optimal total cost per time unit. Finally, given the prevalence of both supplier selection and inventory control problems in supply chain management, this research addresses these problems simultaneously by developing a mathematical model for an *N* -stage serial system. The model determines an optimal inventory policy that coordinates the different stages of the system while allocating orders to selected suppliers in Stage 1. A lower bound on the optimal total cost per time unit is obtained and a 98% effective power-of-two inventory policy is derived. |
| Min, Yeonjoo | Dynamic strategy choice behavior under competitive environment: Application to electronic freight auction marketplaces | University of Maryland, College Park | 2007 | AAT 3260429 | This paper focuses on how to model a player's dynamic strategy choice behavior under the pressure of competition. A dynamic strategy choice model structure for two type of cognitive learning process is formulated, with alternative specifications corresponding to different levels of cognition capacity. Furthermore, the dynamic strategy choice model structure for mixed learning is developed, which combines both elements of two different learning processes. The model is intended to describe how a player or agent in a non-cooperative game with no perfect information and bounded rationality chooses a bidding strategy. We propose a general dynamic strategy choice model framework using the dynamic mixed logit model structure and estimate the model parametrically, using two sets of experimental data. The paper also presents econometric issues that arise in estimating such models given a time series of auction bids and outcomes, and formulates error structures appropriate to the highly interactive dynamic nature of competitive auction-based marketplaces. |
| Nakabayashi, Jun | Empirical and theoretical analysis of public procurementauctions | The Ohio State University | 2009 | AAT 3375830 | Spending approximately 10 percent of the gross domestic product (GDP), governments are the biggest buyer of goods and services for many countries. Sound public procurement policies and practices are essential not only to good governance, but also to a strong and stable economy. On the other hand, due to the fact that more than 99 percent of all businesses are small in most of the countries, the involvement of small businesses are vital for the governments seeking to establish competition, innovation and value for money in the delivery of public goods and services. In fact, small businesses are likely to be disadvantage in production costs and lack in knowledge of available contract opportunities. Moreover, since it naturally would fit better to the small businesses, many of them serve to government contracts as subcontractor. In this thesis, I analyze public procurementauctions both empirically and theoretically, focusing on the role and impact of small businesses in government procurementmarket. To level the playing field for businesses seeking to bid for public sector contracts, many governments adopt small business programs and provide contract opportunities for businesses operated by members of disadvantaged groups. The federal government, for instance, has its goal of awarding 23 percent of its contracting dollars to small businesses. The redistribution arising from such programs, however, can introduce significant added costs to government procurement budgets. In my first essay “Small Business Set-asides in ProcurementAuctions: An Empirical Analysis,” I examine to what extent small business set-asides increase government procurementcosts, and how set-asides promote access of the beneficiaries to procurementmarkets. The estimates employ data on Japanese public construction projects, where approximately 50 percent of the procurementbudget is set-aside for small and medium enterprises (SMEs). Using nonparametric estimation of asymmetric first-price auctions with affiliated private values, I find that, in each auction, smaller firms are likely to have higher production costs and obtain less expected profits than larger firms. Applying such a quantitative relationship between profitability and firm size into the static entry model, I then conduct a counterfactual simulation to indicate that approximately 40 percent of SMEs would exit from the procurement market were set-asides to be removed. Surprisingly, the resulting lack of competition would increase government procurement costs (0.4 percent), more than offsetting the resulting production cost inefficiency. The second essay “Procurement auctions with pre-award subcontracting” addresses issues in pre-award subcontract competition. To be the lowest bidder in procurementauctions, prime contractors commonly solicit bids from subcontractors at the bid preparation stage. A remarkable feature of the subcontract competition is that winning is not everything; the awarded subcontractor gets a job conditional on his prime contractor's successful bid. I model a simple two-stage game. Each prime contractor solicits irrevocable price quotes from subcontractors and chooses one in the first stage, assuming that the subcontractors' costs are private information. Relying on the selected price quote, the prime contractor computes the project cost and bids in the auction at the second stage. I find that, in response to increasing competition in the downstream competition, prime contractors have a stronger bargaining power against subcontractors. The behavior results in an endogenous downward shift in the distribution of bidders' costs as the number of rivals increases, or the reservation price drops, unlike the case in the standard mechanism design model where the distribution of bidder's private information is independent from such competitive environment variables. As a result of the theory, I demonstrate that the revenue maximizing reservation price is decreasing in the number of bidders. Furthermore, if the prime contractors' endogenous participation in the procurement auction is taken into account, it is shown that subsidizing the potential bidders' entry is a remedy to solve the double marginalization problem, allowing the auctioneer to extract more rents from subcontractors. The final essay “Equilibria in Asymmetric Auctions with Entry” discusses an affiliated private value auction with entry. The contribution of this paper is to relax the symmetric assumption (i.e., the potential bidders may not be ex ante the same). The main findings are threefold. First, auction is optimal (revenue maximizing) if and only if the mechanism is ex post efficient. Second, without any participation control, a coordination problem in which only the lower value bidders participate and the higher value bidders stay out is likely, which makes the auctioneer worse off. Finally, there is an entry fee/subsidization scheme which, together with an ex post efficient mechanism, implements the optimal outcome as a unique equilibrium. Contrary to the existing theorem which claims that in asymmetric auctions well-designed ex post inefficient mechanisms are optimal (e.g., Myerson (1981), McAfee and McMillan (1987)), our results show that, even in an asymmetric auction, the mechanisms with free entry and no distortion are optimal taking into account the potential bidders endogenous participation. |
| Nandiraju, Srinivas | Strategic freight transportation contract procurement | University of California, at Irvine | 2006 | AAT 3209306 | Auction based market clearing mechanisms are widely accepted for conducting business-to-business transactions. This dissertation focuses on the development of auction mechanism decision tools for freight transportation contract procurement. The dissertation categorizes the problems in freight procurement auctions arising in both spot markets and long term markets. Spot markets are widely employed over the Internet using standard classic auctions. For long-term markets, large shippers (typically manufacturing companies or retailers) have begun to use combinatorial auctions to procure services from trucking companies and logistics services providers. Combinatorial auctions involve very difficult optimization problems both for shippers and carriers. In the US truckload market few carriers have the technical sophistication to develop bids for combinatorial auctions. To address this problem we look at a different auction scheme termed a unit auction, where the shipper can exploit the economies of scope in the network and give the carriers the chance to bid on pre-defined packages similar to 'lotting' in supply chain procurement. The problems in developing contract allocations, called the winner determination problem, are computationally complex and large-scale. Hence the development of good heuristics is of utmost importance. Shippers have non-price business constraints, which must be included in the winner determination problems to closely match shipper business objectives. We develop winner determination problem formulations incorporating the non-price business constraints and develop Lagrangian based optimization methods and greedy approximation algorithms for both unit auctions and combinatorial auctions. Extensive empirical results are provided to test the performance of the heuristics against a standard integer-programming solver. Bidding in auctions from the carrier's perspective is complicated as it involves taking into account the competitive behavior of other carriers and a carrier's difficult network optimization problems. We develop bidding strategies for carriers in spot markets using concepts from economic auction theory. For long-term market bidding, we study the effects of demand uncertainty, competitive behavior, carrier network synergies and strategic pricing, and shipper's winner determination problems on carrier bidding using optimization-based simulation analysis. |
| Pan, Xiajun | Optimization of material sourcing and delivery operations, and assortment planning for vertically differentiated products and bundles | The University of Texas at Austin | 2009 | AAT 3389988 | Optimization of materials supply and inbound logistic operations has become increasingly important as firms have continued to pursue outsourcing options. Further, the proliferation of products and advances in information technology has greatly impacted retailers' marketing strategies in the past decade. In this dissertation, we address how to optimally develop integrated sourcing and delivery planning, and how to optimally offer vertically differentiated products and bundles. In the first essay, we address a combined sourcing and delivery planning optimization problem, which is motivated by a practical problem facing materials and supply planners for construction projects in a leading corporation. We develop a decision support model and an effective solution approach for integrated sourcing and delivery planning for bulk materials. This approach, implemented and currently in use at the company to support material delivery planning for track maintenance projects, has yielded significant savings of millions of dollars annually. In the second essay, we study the problem of a retailer managing a category of vertically differentiated products. We consider two settings: the exogenous prices case and the endogenous prices case. In the former case, the selling prices are exogenously determined and the retailer's only decision is to determine the set of products to offer. In the latter case, the retailer also determines the selling prices. We develop efficient methods to identify the optimal solutions for both cases and provide valuable insights and guidelines for practitioners. In the third essay, we study how to choose the optimal bundling strategy for a retailer offering vertically differentiated information goods. We characterize conditions under which pure bundling and mixed bundling strategies are optimal respectively. We provide efficient methods to identify which individual components to offer, whether or not to offer a bundle containing all the components and how to price the offered individual components and the bundle in order to maximize the retailer's profit. |
| Saini, Viplav | Endogenous asymmetries in dynamic procurementauctions | The John Hopkins University | 2009 | AAT 3392427 | This dissertation analyzes the behavior of forward-looking firms that compete with each other repeatedly in government procurementauctions. This dissertation brings together auction theory, the theory of dynamic games, and numerical methods to analyze the dynamic bidding and investment behavior of such firms. We begin by analyzing a model where two firms of similar sizes compete repeatedly for procurementcontracts. As they win auctions, they stochastically accumulate a backlog of projects, and endogenouslybecome asymmetric when their backlogs are different. We solve for the equilibrium of this dynamic game, and explore the efficacy of different procurementpolicies for the procurer. We find that it is most efficient and cost-minimizing for the procurer to give out small contracts frequently. We also find that the bidders perceive themselves to be less asymmetric the more forward-looking they are. Next, we consider situations like affirmative action programs where the firms may be exogenously asymmetric to start with. We find that affirmative action is more effective the less farsighted the bidders are. We also solve a two-period *n* -bidder model that allows for reserve prices set by the procurer. Finally, we endogenize firm size by allowing firms to repeatedly invest in capacity. We discover an increasing dominance force in this auction whereby even if the initial firm sizes are symmetric, the industry tends to gravitate towards asymmetric market shares in the long run. |
| Tsai, Mei-Ting | Real option-based procurement for transportation services | University of California at Irvine | 2008 | AAT 3364978 | This dissertation develops a method to create value through more flexible procurement contracts, which could benefit the trucking industry as a whole--particularly in an uncertain business environment. Truckload rates and options prices are rigorously investigated and modeled. In addition, parameter estimation for a continuous stochastic model is explored using discrete statistics. Finally, numerical examples are illustrated and a picture of truckload option trading is presented. Results suggest that truckload options have the potential of significantly benefiting the trucking and logistics industries. |
| Wadhwa, Vijay | Multi-objective decision support system for global supplier selection | The Pennsylvania State University | 2008 | AAT 3441117 | Supply segmentation technique provides a mechanism for distinguishing among different items and services that are purchased by a firm with the goal of developing specific strategies to meet the needs of the organization. In this dissertation we segregate the purchasing process into a 2x2 matrix (4 quadrants) with the cost of products on x-axis (Low/High) and supply risk on y-axis (Low/High). The objective is to develop supplier selection methods for each quadrant of the matrix. For each quadrant, we formulate a different optimization model and solve it using multi-objective optimization methods. For the Tactical products (quadrant 1, low cost, low risk) we consider a multi-period planning horizon problem. The buyer forecasts the demand of each product for. Leverage items (quadrant 2) have a high price but low supply risk. Hence, the primary objective for supplier selection in this category is to reduce the price of the purchased products. Critical items represent quadrant 3 (low cost, high risk). In this quadrant we suggest the organizations seek supplier base globally. Hence, along with cost we incorporate risk factors in the supplier selection process. Quadrant 4 represents strategic items (high cost, high risk) that require long-term partnership with the suppliers. Multi-criteria decision making methods with multiple decision makers are most suitable for this quadrant. We use Analytic Hierarchical Process (AHP) and Total Cost of ownership (TCO) to measure qualitative and cost criteria. A pairwise comparison method is used to combine AHP and TCO objectives to determine the best suppliers. Finally we introduce the use of Radio Frequency Identification (RFID) in Supply Chain Management and present the benefits of implementing RFID through a real-life case study. |
| Wan, Zhixi | Simultaneously managing procurement costs and risks | University of Michigan | 2009 | AAT 3392945 | The dissertation consists of three essays. The first essay adopts an optimal mechanism analysis to study how a buyer can best use a reverse auction in combination with supplier qualification screening processes to determine which qualified new supplier to contract with. The main takeaway for practitioners is that the standard industrial practice of fully qualifying all suppliers before the auction can be improved upon by judiciously delaying all or part of the qualification screening process until after the auction. The second essay extends the insights of the first essay to a setting where a buyer conducts an auction with her qualified incumbent supplier and a possibly unqualified entrant, and shows that the incumbent will strategically drop out of the auction early to forestall a bidding war if the buyer delays the entrant's qualification screening until after the auction. The third essay examines how a buyer can choose suppliers from different geographic regions to mitigate region-specific cost shocks to “non-price costs” covering logistics, tariffs, shipping insurance and commissions. It shows that the buyer's optimal diversification decision depends on her degree of bargaining clout, i.e., her ability to impose auction mechanisms to curtail suppliers' windfall profit-taking. The more bargaining power the buyer has, the more she prefers a diversified supply base. |
| Xu, Zhou | Transportation procurement planning with side constraints | Hong Kong University of Science and Technology (Hong Kong) | 2007 | AAT 3285730 | This thesis studies transportation procurement planning problems for the shipper with three different side constraints. To solve the problem practically, we provide a mixed-integer programming model defined by a number of strong facets, which is shown to be strongly *NP* -hard even for a single-route network. We develop a solution approach which builds on the solution of the subproblem when only one transportation company is available to construct heuristic algorithms, including a linear programming relaxation-based method. Worst-case analysis is given and the effectiveness of the algorithms is tested in numerical experimentation. By examining parameter sensitivity, insight is provided on how the algorithms can be used by the shipper for making procurement decisions. The practical usefulness of the model and the solution approaches is substantiated by its deployment with a multinational shipper for its sea freight procurement. Since most global shippers are large manufacturers, they have various business units all over the world. When purchasing transportation service from carriers, the central decision maker of the shipper needs to satisfy the preferences of different business units. We therefore study a service provider allocation problem for global shippers to procure transportation service with various preferences constrained by their business units all over the world. The problem has been formulated by a constraint programming model, and its hardness has been discussed extensively. In order to resolve the intractability, we propose a decomposition approach to structure the preference constraints, so that the model can be solved optimally under some conditions. We also illustrate how such conditions can be satisfied in practice. The model and solution approaches have been integrated into a decision support system for a multinational shipper to purchase its express courier service. |
| Yu, Seunghee | IT assimilation and business performance improvement: Theory and empirical investigation in the context of E-procurement applications | Carnegie Mellon University | 2005 | AAT 3248500 | This dissertation examines two important IT management issues: IT assimilation and Business Value of IT. First, this dissertation examines the factors that influence the assimilation of e-procurement within organizations. Second, this dissertation investigates the relationship between the assimilation and the performance improvement. Combined together, the answers to these questions are expected to provide valuable management implications for facilitating a successful assimilation and, in turn, achieving intended business performance improvement through the assimilation efforts by organizations. This study attempts to fill this gap and enhance our understanding of factors that affect IT impact on performance by examining the link between the determinants of IT implementation success and organizational performance and the mediating role of IT usage in the link especially in the context of e-procurement assimilation. In specific, the key research questions that motivate this study include: (1) Does e-procurement applications have positive impacts on purchasing performance? (2) What are the factors that contribute to the positive impacts? In an effort to address these research issues, this study first probes the link between the usage of e-procurement applications and intermediate purchasing performance measures, and examines the impact of the determinants of e-procurement implementation success on the purchasing performance improvement, mediated through e-procurement usage. The empirical investigation of this study is conducted using survey data of e-procurement assimilation by organizations in service industries that are collected through a series of web-based surveys. The results support the positive and significant link between the determinants of the implementation success and performance and demonstrate the mediating role of usage in the link. |
| Zhang, Zhuoxiu | Analysis of multi-attribute multi-unit procurementauctions and capacity-constrained sequential auctions | Mississippi State University | 2009 | AAT 3366257 | This dissertation examines an iterative multi-attribute auction for multi-unit procurement in the first part. A multi-unit allocation problem that allows order split among suppliers is formulated to improve the market efficiency. Suppliers are allowed to provide discriminative prices over units based on their marginal costs. A mechanism called Iterative Multiple-attribute Multiple-unit Reverse Auction (IMMRA) is proposed based on the assumption of the modified myopic best-response strategies. Numerical experiment results show that the IMMRA achieves market efficiency in most instances. The inefficiency occurs occasionally on the special cases when cost structures are significantly different among suppliers. Numerical results also show that the IMMRA results in lower buyer payments than the Vickrey-Clarke-Grove (VCG) payments in most cases. In the second part, two sequential auctions with the Vickrey-Clarke-Grove (VCG) mechanism are proposed for two buyers to purchase multiple units of an identical item. The invited suppliers are assumed to have capacity constraints of providing the required demands. Three research problems are raised for the analysis of the sequential auctions: the suppliers’ expected payoff functions, the suppliers’ bidding strategies in the first auction, and the buyers’ procurement costs. Because of the intrinsic complexity of the problems, we limit our study to a duopoly market environment with two suppliers. Both suppliers’ dominant bidding strategies are theoretically derived. With numerical experiments, suppliers’ expected profits and buyers’ expected procurementcosts are empirically analyzed. |

Code 13: Order Processing & Information Systems

| **Author** | **Title** | **Institution** | **Year** | **Number** | **Abstract** |
| --- | --- | --- | --- | --- | --- |
| Holmqvist, Magnus | Developing and implementing IS/IT in aftermarket logistics | Goteborgs Universitet (Sweden) | 2007 | AAT C829436 | The objective of this dissertation is to improve the understanding of how to develop and implement IS/IT in aftermarket logistics. Collaborative practice research and interpretive case studies, coupled with in-depth access at Volvo, have resulted in several contributions. First, this research shows that using scenario development facilitates strategic awareness. It also shows that gradual development and continuous implementation nurture learning and even innovation. Agile capabilities are needed to achieve sustainable progress in both systems development and business implementation. Further, the findings indicate that process integration takes time--often longer than the involved actors expect. Finally, organizations can align business and IS/IT through a joint formation that executes comprehendible projects according to a clear direction. This research contributes to existing questions on actual usage and delivered business value. The contributions of this thesis have resulted in considerable business value in terms of industrial effects. These include high return on investment and a user-driven development with direct adjustment capabilities that result from rapid implementations. Beyond these business values is the priceless potential for sustainable learning and innovation. Nevertheless, developing and implementing IS/IT in aftermarket logistics remains challenging. This research implies that using scenario development-along with gradual development and continuous implementation-contributes to aligning business and IS/IT. |
| Kachornvitaya-Wan, Valika | Complex integrated order fulfillment technology: A holonic approach | Dartmouth College | 2009 | AAT 3342807 | This research integrates holonic concepts into a hierarchical control framework of a complex automated order fulfillment technology. Simulation of an actual full-scale order fulfillment system is used as a test environment. The degree of difficulty in concept implementation, or retro-fitting of the control technology is also assessed. The goal is to demonstrate the performance improvements of a “goods-to-man” logistics system by altering its controls to incorporate more flexibility and fault tolerance. The introduction of holonic concepts results in the creation of a more decentralized and more flexible system. Most functions and stages of decision-making in the control system show improved system performance under normal operating conditions. Improvements are clearly visible in average order processing time, order stream completion time, crane utilization, and average workstation performance. More notably, performance when disturbances are present, are consistent with expectations that holonic based systems possess higher fault tolerant capabilities. While the existing control system continued to operate with significant decline in performance in the face of disturbances, the results from the holonic-based system indicates faster recovery and continued robust performance even in the presence of disturbances. Experimental results are documented and analyzed to draw conclusions from the work. Guidelines for control system retrofit in such environments are also provided. |

Code 14: Decision Support Systems

| **Author** | **Title** | **Institution** | **Year** | **Number** | **Abstract** |
| --- | --- | --- | --- | --- | --- |
| Al-Nory,  Malak Talal | Service composition framework to unify simulation and optimization in supply chains | George Mason University,  Virginia | 2009 | AAT 3364561 | Decision-making for supply chains requires the implementation of simulation and/or optimization techniques. Object-oriented simulation provides many advantages in ease of model development, testing, and extensibility, yet it is mainly based on trial-and-error, and thus, lacks systematic optimization. Mathematical programming (MP), on the other hand, allows supply chain problems to be solved efficiently using solvers with well-established optimization algorithms. Proposed in this dissertation is a framework and language that unify the simulation and optimization of supply chains by providing modelers with the advantages of simulation-like model development, testing, and reuse, and at the same time, the efficiency of MP. The proposed Service Composition (SC) model represents a business transaction as a Service; consequently, the supply chain can be modeled as a Service with interrelated composite or atomic sub-services. The constructor may involve decision-choice constructs for one or more decision variables and assert statements. While the procedural language provides the "simulation-like" semantics, the optimization semantics is achieved by automatic compilation of the simulation model into a MP model and solving it using an external solver. This dissertation also studies modeling of the supply chain services that involve uncertainty factors. The proposed two-stage recourse stochastic programming extension provides an environment to model services for decision-making with future corrective response. The decision variables are represented by means of a special structure to capture the random parameters. The effectiveness of our proposed framework is assessed with experiments that compare the performance of automatically compiled supply chain models with expertly crafted ones. |
| Aytac, Berrin | Characterizing demand uncertainty in high-tech environments: Models, analysis, and case studies | Lehigh University, Pennsylvania | 2009 | AAT 3354761 | First we describe a demand characterization methodology that combines information provided by life-cycle growth models and demand leading indicators. Using a Bayesian framework, we propose a method to improve forecast accuracy while reducing the variation in model projections. We present two field studies conducted at the semiconductor industry. The first case study focuses on the leading-indicator analysis and its implications in different planning functions. The second case study describes full implementation of the integrated approach at a major semiconductor firm and illustrates its performance in reducing forecast variation. As a separate theoretical study, we analyze the effect of demand uncertainty on capacity procurement decisions using a game-theoretic model. We discuss the trading firms' incentives and procurement decisions under different market characteristics and decision-making structures, and investigate coordination mechanisms that improve the efficiency of the supply chain. We show that the buyer behaves opportunistically in communicating the demand forecast information, and does not have incentive to choose the optimal forecast-improving activities. This dissertation contributes to the theory and practice of operational planning by proposing a demand characterization methodology that focuses on improving the variability in demand as well as its accuracy, and by analyzing the impact of demand uncertainty on the operational decision-making activities of the supply chain. |
| Baghdasaryan, Lusine | Information updates and inventory decisions for supply chain management | University of Illinois at Chicago | 2009 | AAT 3380676 | First, we have investigated the effect of accuracy of lead-time information on supply chain costs. We have utilized two types of models for this purpose: two-station and two-time decision inventory models to study the effects of different levels of information accuracy on total costs. We have studied the expected total cost function in terms of update decisions, order size and minimum accepted demand amount. For the sequential two-station inventory model, we have provided convexity conditions of the expected total cost function under various inventory policies. When the convexity conditions are met, one can minimize the cost through derivatives. When the convexity conditions are not met, we suggest that direct search be conducted to find the minimum cost solution. For the two-time decision inventory model we found that the expected total cost function is too complex to be solved analytically. We have utilized computational methods, in particular a genetic algorithm, to study the behavior of the total cost for this case. The example problems for both types of models showed that accuracy of information is important for minimizing costs in inventory decision making. Lastly, we have illustrated a framework for a new modeling and optimization management tool (MOMT) for large-scale supply chain networks. A graph-based method is used to automatically generate and update optimization models for large-scale supply chain networks. MOMT increases accuracy and flexibility of modeling and information processing in large-scale SC models. The tool applications, advantages and disadvantages are described by real world examples from Motorola Inc. SC. |
| Balcik, Burcu | Relief chain planning and management: Modeling and analyzing humanitarian logistic problems | University of Washington | 2008 | AAT 3318156 | Despite the stakes and size of the relief industry, the study of humanitarian relief (supply) chains has received little attention and hence quantitative methods and principles that consider the unique characteristics of this domain have not been widely developed. This study is motivated by the needs of relief organizations to develop and implement systematic tools that will enable them to manage their relief chain and logistics operations. We address three critical areas in humanitarian relief chain management: performance measurement, facility location, and last mile distribution. First, we focus on performance measurement and develop performance metrics and a performance measurement framework, which can be used as a basis for a performance measurement system in the relief sector. Secondly, we consider a strategic network design problem, in which facility location and stock pre-positioning decisions are addressed. We develop a variant of maximal covering location model that integrates facility location and inventory decisions and considers various aspects related to strategic relief supply pre-positioning. We present a computational analysis that demonstrates the effects of pre- and post-disaster relief funding on relief system performance, in terms of response time and the proportion of demand satisfied. Finally, we consider the last mile distribution problem in humanitarian relief and develop an analytical approach that will support relief practitioners in making local distribution decisions. In particular, we propose a modeling approach that determines cost-efficient delivery schedules and routings for vehicles while achieving equitable aid distribution. To solve the model in reasonable times, we develop a heuristic based on Simulated Annealing for the last mile distribution problem. We show that the Simulated Annealing algorithm provides good solutions to large problems. |
| Baramichai, Manisra | Supplier partnership establishment under uncertainties for agile organizations | Lehigh University, Pennsylvania | 2007 | AAT 3285754 | The objective of this dissertation is to develop the decision support system to help companies improve their supply agility by focusing on the purchasing decisions and processes. Under today’s volatile business environment, companies are reaching the point where they need to be more agile--intelligent, fast, flexible, and responsive to changes. Leveraging supplier-buyer relationships to create agile supply chains is one of the strategies that can help companies make a successful transition to an agile enterprise. The increasing reliance on suppliers to deliver the values to customers has transformed a purchasing function to become a revenue driver and a vital determinant to ensure the profitability and the survival of businesses. The focus on change response abilities has affected the purchasing strategy and practices taken by companies to master and respond to changes as well as created the needs for a new set of tools to support the purchasing-related decisions. In this dissertation, we propose a comprehensive, modular decision support system, which includes tools, models, and framework to assist companies in making three key purchasing decisions, the supplier-buyer relationship establishment, the supplier performance evaluation, and the supplier selection and order allocation. Our developments and analysis relies on the Quality Function Deployment (QFD), the Analytic Hierarchy Process (AHP), and the stochastic programming technique. The final deliverables include: (1) The new QFD-based model, Agile Supply Chain Transformation Matrix (ASCTM), for determining appropriate strategy and approaches for supply chain configuration and supplier-buyer relationship establishment; (2) The comprehensive framework consisting of tools, metrics, and model structures for evaluating supplier's agile performance; and (3) The Stochastic Supplier and Order Allocation Portfolio model (S-SOAP) for determining the purchasing decision related to supplier selection, contract establishment, and order allocation assignment under uncertainty. |
| Bassil, Sarita | Workflow technology for complex socio-technical systems | Universite de Montreal (Canada) | 2005 | AAT NR05142 | Workflows are a major enabling technology for areas such as supply chains, logistics and production. Hence, a clarified and a refined set of concepts and functionality for workflow management systems (WfMSs) is gathered, and appropriate solutions are proposed to deal with this set. In this context, the Workflow Reference Model is also reviewed, and an extension thereof is suggested to accommodate these concepts and functionality. In this thesis, we study an e-negotiation support system (CONSENSUS) based on a WfMS. CONSENSUS was developed to help the user model and enact a specific kind of e-negotiation using workflows. This system requires, however, support for dynamic modification induced by unexpected events that can occur during negotiation. Current WfMSs (e.g., IBM MQ Series Workflow, BEA's WLPI) support this kind of dynamism in a limited way only, thus reducing the benefits of the CONSENSUS approach to e-negotiations. Another complex socio-technical application, the multi-transfer container transportation (MTCT) application, exhibits inherently dynamic requirements for workflow modeling. We devise a workflow-oriented system for the processing of customer requests for container transportation. This processing is achieved by specific sequences of interdependent activities that need to be created just-in-time and then adapted to deal with unexpected events that may occur. The creation and the adaptation of activity sequences are based on an optimized resource management and activity scheduling. In the first system, we integrate a WfMS prototype (ADEPT) that supports some of the required dynamic modifications at the workflow instance level. On one hand, this integration increases the benefits of the CONSENSUS approach. On the other hand, it sheds the light on several workflow requirements not yet fully supported by current WfMSs. In the second system, the ADEPT prototype is also used. Its API is enriched with useful functionality, and workaround solutions are required to properly cope with the definition of a workflow model and with the (dynamic) management of instances. The realization of these two applications reaches far beyond the CONSENSUS and the MTCT projects. Particularly, we analyze best effort solutions (proper use of WfMS features, workarounds, etc.) applying three state-of-the-art WfMSs. We also work on a formal extension of a workflow meta-model to propose a correctness criterion for safely interrupting running workflow activities. This is a functionality of utmost importance. As research perspectives, the identified "wish list" and the problems expressed while experimenting with current WfMSs may define an agenda for further research in the workflow technology domain. |
| Boushell, Thomas G. | Class-constrained  lot-to-order matching | Arizona State University | 2005 | AAT 3178227 | World semiconductor sales reached an all-time high in 2004, exceeding $213 billion, according to the Semiconductor Industry Association. With the demand for integrated circuits continuing to grow, semiconductor manufacturers look for any improvements in efficiency that could potentially yield huge savings. These potential savings come from a variety of places within the industry, ranging from the manufacturing process to the supply chain. This dissertation will focus on an issue in the manufacturing process called the class-constrained lot-to-order matching problem (CLOMP), where individual lots of integrated circuits are matched to specific customer orders, while seeking to optimize multiple objectives. Our inclusion of multiple classes causes the problem's complexity to significantly increase when compared to the single-class version. We first formulate the problem as an integer program, and then decompose it into two stages. The first stage is a knapsack problem that loads the factory, while the second stage is a modified bin-covering problem that fills the selected orders. By effectively matching supply to demand using our proposed heuristics, we can reduce the costs associated with delivering the product to the customer. Based on solutions to the decomposed model, this dissertation makes recommendations regarding the most appropriate initial inventory level, first stage sorting algorithm and second stage matching heuristic under a variety of operating conditions. Overall, the apparent tardiness cost indexing function and the first-in, first-out with improved endgame matching algorithm produce the best results under most circumstances. |
| Bucci, Michael James | Solution procedures for logistic network design models with economies of scale | North Carolina State University | 2009 | AAT 3425955 | This research uses of heuristic approaches to solve large-scale facility location problems that reflect economies of scale in the per-unit costs of processing goods and/or holding safety stock of those goods to protect against uncertainty in demand. Such non-linear economies of scale are well known in practice, but are often excluded or overly simplified in location models due to their non-linear nature. Combining and extending existing heuristic approaches, we develop and analyze several meta-heuristics to solve a location problem with a non-linear, concave cost function, which is used as a surrogate for more computationally complex cost functions. These meta-heuristics are then applied to a focused study on the use of approximations to represent safety stock inventory costs in location models. This research evaluates the commonly used "Square Root Law" and a more general concave cost function against the explicit safety stock inventory calculation in models with and without inter-customer demand correlation. The results highlight the conditions for which these functions accurately approximate actual inventory costs and/or when they generate location solutions that are close to those generated by the explicit computation of inventory levels. The meta-heuristics are then applied to a reverse logistics location problem for the carpet industry. This application requires us to recommend locations for processing used carpet in a setting where the recycling facilities to be located exhibit economies of scale in processing. We use our modeling approach to analyze an existing, smaller-scale used carpet collection network and also evaluate a larger hypothetical national collection network, providing insight into the number of recycling facilities that should be located and their respective size. We compare the results of formulating and solving models with and without economies of scale, highlighting the value of their inclusion on the results. |
| Cao, Min | Models for delivery and price equilibrium and statistical quality control in supply chains | University of Hong Kong (Hong Kong) | 2007 | AAT 0820635 | This dissertation study the nature of delivery and price competition in a buyer-supplier supply chain network, and then study statistical quality control which can be applied to many stages in a supply chain. This dissertation consists of two parts. In Part I, we present equilibrium models for delivery and price competition under the assumption of cooperative JIT purchasing and small-lot delivery, in which the buyers request products in small-lot frequent deliveries, while the suppliers compete for order shares by supplying products to the buyers at attractive prices and with good delivery arrangements. We also consider two scenarios about the transportation of products, in which Model 1 assumes that the buyers are responsible for transportation of the products purchased, and Model 2 assumes that the suppliers are responsible for delivering the products to the buyers. We investigate how cost affects delivery and price competition, and how delivery competition changes demand allocation. In order to enhance the profitability of buyers who face volatile demand, an information entropy approach is used to minimize the increase in information entropy in Model 3. Numerical examples are given to illustrate these models. In Part II, we develop and study a new statistical distribution called negative binomial group distribution (NBGD), which is derived from a group by group inspection procedure called negative binomial group inspection (NBGI). Based on the NBGI, we propose a new control chart called the cumulative group count control chart (CGCC r chart) and a new sequential acceptance sampling plan. Numerical examples are given to show how the CGCC r chart and the NBGD acceptance sampling plan work as tools in statistical quality control. The proposed CGCC r chart and the NBGD acceptance sampling plan provide examples for the construction of two-dimensional control charts and acceptance sampling plans. |
| Capar, Ismail | Coordination of inventory and transportation decisions in a two-stage supply chain | Mississippi State University | 2007 | AAT 3296195 | In this research, we focus on a two-stage supply chain with alternative supply sources. We deal with a problem in which the buyers do not trust sellers and ask for timely shipments. In the problem, buyers are located in two regions and each region consists of a single distribution center (DC) and multiple retailers. Retailers place orders to DCs whereas DCs replenish their inventory from outside suppliers. As retailers place orders to DCs, DCs do not send items immediately to retailers. We approach to the problem from two different perspectives; retailers' perspective and supply chain perspective. When a retailer is ready to replenish its inventory, that retailer must decide whether it should replenish from the first or second DC. We develop a decision rule that minimizes the expected cost for the retailer that is about to replenish its inventory; then retailers repeatedly use this decision rule as a heuristic. The decision rule forms the basis of our proposed ordering policy. A simulation study, which compares the proposed policy to three traditional ordering policies illustrates how the proposed policy performs under different conditions. Overall, the numerical analysis shows, over a large set of scenarios, that the proposed policy performs better than the other three policies. When we approach the problem from the supply chain perspective, we focus on a shipment consolidation problem together with the alternative sourcing problem. To develop two models, we introduce a "promised latest delivery time" concept that is as follows: The promised latest delivery time is the end of shipment consolidation time that the DC provides to retailers at the time of order placement. Numerical experiments suggest that a shipment consolidation policy is more beneficial when cost of transportation high and backlog cost is per unit time is relatively low. In addition, using an alternative supply source is especially beneficial for the supply chain when the cost of serving to both regions is not very high compared to serving to a single region. |
| Carlo, Hector J. | Door assignment and sequencing problems in crossdocks and container terminals | University of Michigan | 2007 | AAT 3253226 | This dissertation is concerned with improving the efficiency of two types of terminals commonly found as key facilities in transportation and supply chain networks: crossdocks and container terminals. Chapter 2 presents a simulated annealing-based heuristic procedure (SA) to determine both inbound and outbound trailer-to-door assignments in order to minimize the overall material handling effort. Two heuristics and optimal solutions are presented to evaluate the SA on internally generated data sets for rectangular crossdocks with 12, 16, 20, and 32 doors and various shapes defined by flatness. Lastly, a new linear MIP formulation for the general Rectilinear-QAP is presented. In Chapter 3, under certain assumptions, a mathematical derivation for the optimal shape (square versus flat) of a rectangular crossdock and the best door locations are presented. In Chapter 4, the SA is used to obtain an outbound door assignment for a 118-door crossdock operated by Con-way. The outbound door assignment obtained with SA outperformed the current door assignment by approximately 35% on several data sets provided by Con-way. Also, the SA procedure is modified to solve a dynamic door assignment problem. In Chapter 5 we shift our focus to container terminals and address the problem of minimizing the total travel and setup time needed for a Rail-Mounted Gantry Crane (RMGC) to retrieve a pre-specified sequence of containers from the storage area in the process of loading vessels. A previously-published heuristic for routing general yard-side equipment is modified for routing RMGCs. Numerical experiments indicate that the modified heuristic outperforms the existing heuristic by an average of approximately 8% in solution quality while reducing the runtime by approximately 80%. Two initialization procedures for the heuristic are proposed, further improving the solution quality of the modified heuristic by approximately 5% while reducing the runtime by more than 452%. |
| Chen, Si | A study of four network problems in transportation, telecommunications, and supply chain management | University of Maryland, College Park | 2007 | AAT 3277426 | The increasing material costs and the rapid advances in computing technology have both motivated and promoted the study of network problems that arise in several different application domains. This dissertation consists of four chapters on network applications in transportation, telecommunications, and supply chain management. The core of our research is to apply heuristic search procedures and combinatorial optimization techniques to various practical problems. In the second chapter we investigate the split delivery vehicle routing problem (SDVRP), where a customer's demand can be split among several vehicles. The third chapter deals with the regenerator location problem (RLP) that arises in optical networks. The fourth chapter solves the parametric uncapacitated network design problems on series-parallel graphs, which have potential application in supply chain management. In the fifth chapter we study the arc routing problem that arises in the small package delivery industry. The last chapter summarizes the dissertation.The results in this dissertation indicate that the methodologies developed to solve the network problems in the four different applications are quite efficient. Consequently, when applied in practice, they have the potential to significantly improve the operational efficiency of organizations in the relevant application domains. |
[truncated: 660,633 more chars]
